# Supplementary material for: Effects of grazing strategy on facultative grassland bird nesting on native grassland pastures of the Mid-South USA
Source: PeerJ. 2022 Sep 28;10:e13968. doi: 10.7717/peerj.13968 (PMC9526412; doi:10.7717/peerj.13968)
Supplement: Data S1 — Nesting data and vegetation measurements collected for nest survival. [file peerj-10-13968-s002.xlsx]

## Sheet: Column ID
SubHgt	NHgt	Y1P	YR2	YR3	TRT	PBG	ROT	CON	Grass	Forb	Lit	BG	VOR	CV
Nesting Substrate height	Nest height	2014	2015	2016	Treatment	Patch-burn grazed	Rotational Grazing	Control	%grass cover	% forb cover	% litter	% bare ground	visual obstruction	coefficient of variation

## Sheet: FISP
FirstFound	LastPresent	LastChecked	Fate	Freq	Y1P	YR2	YR3	TRT	PBG	ROT	CON	QUICK	DREC	BGAD	SubHgt	NHgt	Grass	Forb	Lit	BG	VOR	CV
15	40	40	0	1	1	0	0	0	0	0	1	0	0	1	139	34	92.5	6.25	1.25	0	86.25	38.51
7	7	10	1	1	1	0	0	0	0	0	1	0	0	1	130	50	95	5	0	0	42.5	38.51
7	19	22	1	1	1	0	0	0	0	0	1	0	0	1	105	26	100	0	0	0	57.5	38.51
34	37	40	1	1	1	0	0	0	0	0	1	0	0	1	95	22	100	0	0	0	96.25	38.51
49	54	54	0	1	1	0	0	0	0	0	1	0	0	1	129	48	83.75	13.75	1.25	0	82.5	38.51
63	72	75	1	1	1	0	0	0	0	0	1	0	0	1	123	73	95	1.25	0	0	115	38.51
35	37	40	1	1	1	0	0	0	0	0	1	0	0	1	60	5	95	5	0	0	50	38.51
77	80	84	1	1	1	0	0	0	0	0	1	0	0	1	119	30	65	26	0	0	95	38.51
61	82	82	0	1	1	0	0	0	0	0	1	0	0	1	128	27	66.25	33.75	0	0	63.75	38.51
62	68	68	0	1	1	0	0	0	0	0	1	0	0	1	165	61	48.75	23.75	0	2.5	138.75	38.51
26	26	29	1	1	1	0	0	0	0	0	1	0	0	1	140	35	88.75	6.25	0	0	63.75	38.51
69	71	71	0	1	1	0	0	0	0	0	1	0	0	1	60	35	86.25	13.75	0	0	65	38.51
57	64	64	0	1	1	0	0	0	0	0	1	0	0	1	120	50	77.5	18.75	0	0	83.75	38.51
7	7	11	1	1	0	1	0	1	1	0	0	0	0	1	40	10	30	48.75	10	0	35	67.02
11	32	35	1	1	0	1	0	0	0	1	0	0	0	1	10	40	56.25	10	33.75	0	2.5	66.47
14	14	18	1	1	0	1	0	0	0	1	0	0	0	1	40	15	77.5	0	22.5	0	26.25	66.47
20	27	33	1	1	0	1	0	0	0	1	0	0	0	1	90	40	27.5	62.5	2.5	0	72.5	66.47
22	28	32	1	1	0	1	0	1	1	0	0	0	0	1	130	5	27.5	45	27.5	0	60	67.02
26	35	39	1	1	0	1	0	1	1	0	0	0	0	1	80	20	32.5	22.5	15	20	55	67.02
32	42	46	1	1	0	1	0	0	0	1	0	0	0	1	100	20	16.25	73.75	2.5	7.5	40	66.47
32	35	39	1	1	0	1	0	1	1	0	0	0	0	1	80	20	57.5	21.25	8.75	3.75	57.5	67.02
33	36	36	0	1	0	1	0	0	0	1	0	0	0	1	70	20	55	25	20	0	50	66.47
35	39	42	1	1	0	1	0	0	0	1	0	0	0	1	80	20	42.5	37.5	5	7.5	65	66.47
36	49	53	1	1	0	1	0	1	1	0	0	0	0	1	80	40	26.25	23.75	27.5	3.75	25	67.02
47	56	57	1	1	0	1	0	1	1	0	0	0	0	1	50	20	52.5	35	15	0	30	67.02
56	70	75	1	1	0	1	0	0	0	1	0	0	0	1	65	20	20	42.5	0	0	80	66.47
57	60	63	1	1	0	1	0	1	1	0	0	0	0	1	70	30	42.5	10	27.5	0	57.5	67.02
61	64	64	0	1	0	1	0	0	0	1	0	0	0	1	70	10	42.5	2.5	55	0	35	66.47
4	9	9	0	1	0	0	1	1	1	0	0	0	0	1	50	10	81.25	5	2.5	11.25	47.5	40.13
4	12	12	0	1	0	0	1	1	1	0	0	0	0	1	80	20	45	37.5	17.5	0	72.5	40.13
5	11	11	0	1	0	0	1	0	0	1	0	0	0	1	50	10	86.25	1.25	0	12.5	57.5	41.14
20	26	30	1	1	0	0	1	1	1	0	0	0	0	1	100	20	23.75	76.25	0	0	127.5	40.13
24	49	49	0	1	0	0	1	1	1	0	0	0	0	1	40	20	66.25	12.5	20	1.25	45	40.13
26	51	51	0	1	0	0	1	0	0	1	0	0	0	1	70	20	30	65	5	0	70	41.14
38	44	46	1	1	0	0	1	0	0	1	0	0	0	1	130	70	18.75	81.25	0	0	110	41.14
55	61	62	1	1	0	0	1	1	1	0	0	0	0	1	140	50	23.75	68.75	5	2.5	110	40.13
12	14	14	0	1	1	0	0	0	0	0	1	0	1	0	161	30	52.5	2.5	38.75	6.25	39.5	60.01
13	28	30	1	1	1	0	0	0	0	0	1	0	1	0	180	0	0	85	15	0	96.25	60.01
14	16	28	1	1	1	0	0	0	0	0	1	0	1	0	85	20	38.75	18.75	41.25	1.25	50	60.01
18	33	33	0	1	1	0	0	0	0	0	1	0	1	0	105	40	80	3.75	13.75	2.5	66.25	60.01
16	21	28	1	1	1	0	0	0	0	0	1	0	1	0	95	70	50	30	20	0	58.75	60.01
18	40	40	0	1	1	0	0	0	0	0	1	0	1	0	90	30	85	0	15	0	85	60.01
18	23	30	1	1	1	0	0	0	0	0	1	0	1	0	105	25	55	10	5	0	78.75	60.01
18	23	26	1	1	1	0	0	0	0	0	1	0	1	0	0	0	2.5	40	17.5	40	60	60.01
30	30	33	1	1	1	0	0	0	0	0	1	0	1	0	60	30	95	0	5	0	55	60.01
32	36	36	0	1	1	0	0	0	0	0	1	0	1	0	90	0	90	1.25	8.75	0	76.25	60.01
35	35	37	1	1	1	0	0	0	0	0	1	0	1	0	97	30	1.25	18.75	17.5	0	61.25	60.01
41	68	68	0	1	1	0	0	0	0	0	1	0	1	0	190	35	21.25	66.25	7.5	5	172.5	60.01
43	49	54	1	1	1	0	0	0	0	0	1	0	1	0	190	20	80	0	20	0	97.5	60.01
43	51	60	1	1	1	0	0	0	0	0	1	0	1	0	80	40	37.5	23.75	38.75	0	45	60.01
43	56	56	0	1	1	0	0	0	0	0	1	0	1	0	170	10	70	3.75	26.25	0	90	60.01
48	70	70	0	1	1	0	0	0	0	0	1	0	1	0	250	25	100	0	0	0	80	60.01
48	54	56	1	1	1	0	0	0	0	0	1	0	1	0	170	35	75	0	25	0	90	60.01
48	68	68	0	1	1	0	0	0	0	0	1	0	1	0	175	30	72.5	0	2.5	0	122.5	60.01
49	51	51	0	1	1	0	0	0	0	0	1	0	1	0	80	20	87.5	0	12.5	0	63.75	60.01
51	54	56	1	1	1	0	0	0	0	0	1	0	1	0	170	30	95	0	5	0	111.25	60.01
57	77	77	0	1	1	0	0	0	0	0	1	0	1	0	240	35	96.25	3.75	0	0	110	60.01
62	84	84	0	1	1	0	0	0	0	0	1	0	1	0	175	20	17.5	77.5	5	0	145	60.01
44	62	64	1	1	1	0	0	0	0	0	1	0	1	0	190	35	10	51.25	33.75	5	91.25	60.01
64	68	68	0	1	1	0	0	0	0	0	1	0	1	0	210	20	70	0	22.5	7.5	80	60.01
64	75	75	0	1	1	0	0	0	0	0	1	0	1	0	140	40	92.5	2.5	2.5	2.5	120	60.01
68	84	84	0	1	1	0	0	0	0	0	1	0	1	0	225	25	97.5	0	2.5	0	100	60.01
1	7	7	0	1	0	1	0	0	0	1	0	0	1	0	80	30	27.5	0	72.5	0	27.5	29.68
1	10	15	1	1	0	1	0	0	0	1	0	0	1	0	40	10	28.75	0	71.25	0	43.75	29.68
1	4	4	0	1	0	1	0	0	0	1	0	0	1	0	120	25	47.5	0	52.5	0	35	29.68
4	11	11	0	1	0	1	0	0	0	1	0	0	1	0	110	35	51.25	0	48.75	0	57.5	29.68
4	11	11	0	1	0	1	0	0	0	1	0	0	1	0	80	25	43.75	0	55	1.25	25	29.68
4	7	7	0	1	0	1	0	1	1	0	0	0	1	0	100	20	17.5	0	80	2.5	32.5	40.3
6	19	25	1	1	0	1	0	1	1	0	0	0	1	0	100	28	87.5	5	7.5	0	50	40.3
6	12	12	0	1	0	1	0	1	1	0	0	0	1	0	80	15	68.75	0	31.25	0	30	40.3
6	12	12	0	1	0	1	0	0	0	1	0	0	1	0	60	25	81.25	0	18.75	0	30	29.68
7	11	13	1	1	0	1	0	1	1	0	0	0	1	0	110	25	30	0	70	0	15	40.3
7	25	27	1	1	0	1	0	1	1	0	0	0	1	0	60	20	37.5	0	62.5	0	42.5	40.3
7	11	11	0	1	0	1	0	1	1	0	0	0	1	0	100	0	60	40	0	0	31.25	40.3
7	11	11	0	1	0	1	0	1	1	0	0	0	1	0	100	20	53.75	0	43.75	2.5	42.5	40.3
12	20	20	0	1	0	1	0	1	1	0	0	0	1	0	105	28	45	2.5	52.5	0	72.5	40.3
13	20	25	1	1	0	1	0	0	0	1	0	0	1	0	90	35	50	0	50	0	38.75	29.68
13	36	36	0	1	0	1	0	1	1	0	0	0	1	0	100	10	15	0	83.75	1.25	31.25	40.3
14	32	34	1	1	0	1	0	1	1	0	0	0	1	0	55	15	15	0	85	0	36.25	40.3
17	34	36	1	1	0	1	0	1	1	0	0	0	1	0	85	30	17.5	1.25	68.75	12.5	47.5	40.3
20	28	30	1	1	0	1	0	0	0	1	0	0	1	0	85	35	58.75	0	41.25	0	68.75	29.68
20	34	34	0	1	0	1	0	0	0	1	0	0	1	0	110	30	35	0	65	0	63.75	29.68
22	27	29	1	1	0	1	0	1	1	0	0	0	1	0	150	50	35	0	65	0	70	40.3
28	39	39	0	1	0	1	0	0	0	1	0	0	1	0	170	26.77	80	10	10	0	42.5	29.68
38	48	54	1	1	0	1	0	0	0	1	0	0	1	0	110	25	52.5	0	17.5	30	53.75	29.68
39	60	62	1	1	0	1	0	0	0	1	0	0	1	0	60	30	65	1.25	16.25	17.5	35	29.68
39	39	42	1	1	0	1	0	1	1	0	0	0	1	0	70	27	5	0	95	0	20	40.3
40	42	44	1	1	0	1	0	1	1	0	0	0	1	0	80	35	15	0	81.25	3.75	20	40.3
40	50	50	0	1	0	1	0	1	1	0	0	0	1	0	60	20	55	2.5	42.5	0	40	40.3
41	43	45	1	1	0	1	0	1	1	0	0	0	1	0	160	30	23.75	13.75	62.5	0	92.5	40.3
42	42	44	1	1	0	1	0	0	0	1	0	0	1	0	120	30	15	0	81.25	3.75	17.5	29.68
44	48	53	1	1	0	1	0	1	1	0	0	0	1	0	90	25	70	0	30	0	45	40.3
46	50	53	1	1	0	1	0	1	1	0	0	0	1	0	95	25	47.5	0	50	2.5	43.75	40.3
53	55	62	1	1	0	1	0	1	1	0	0	0	1	0	40	70	51.25	1.25	47.5	0	30	40.3
54	61	61	0	1	0	1	0	1	1	0	0	0	1	0	60	25	5	5	85	5	30	40.3
54	61	65	1	1	0	1	0	0	0	1	0	0	1	0	80	30	68.75	0	31.25	0	40	29.68
55	73	75	1	1	0	1	0	1	1	0	0	0	1	0	100	30	22.5	0	77.5	0	30	40.3
58	61	65	1	1	0	1	0	1	1	0	0	0	1	0	90	22.5	56.875	0	43.125	0	41.875	40.3
61	74	81	1	1	0	1	0	1	1	0	0	0	1	0	115	40	85	0	15	0	68.75	40.3
79	82	82	0	1	0	1	0	1	1	0	0	0	1	0	55	15	37.5	0	0	62.5	8.75	40.3
9	18	18	0	1	0	0	1	1	1	0	0	0	1	0	70	15	0.425	0.0625	0.475	0.0375	57.5	45.69
9	9	11	1	1	0	0	1	1	1	0	0	0	1	0	15	15	0.25	0.275	0.475	0	40	45.69
9	16	16	0	1	0	0	1	1	1	0	0	0	1	0	60	30	0.65	0.1	0.25	0	67.5	45.69
11	11	13	1	1	0	0	1	1	1	0	0	0	1	0	55	10	0.525	0	0.2375	0.2375	42.5	45.69
12	12	18	1	1	0	0	1	1	1	0	0	0	1	0	75	30	0.9125	0	0.0875	0	72.5	45.69
13	37	37	0	1	0	0	1	0	0	1	0	0	1	0	80	30	0.875	0	0.125	0	62.5	39.42
13	30	32	1	1	0	0	1	1	1	0	0	0	1	0	80	40	0.9	0.0125	0.05	0.0375	65	45.69
14	18	20	1	1	0	0	1	1	1	0	0	0	1	0	80	30	0.8125	0.0625	0.1125	0.0125	77.5	45.69
16	16	20	1	1	0	0	1	1	1	0	0	0	1	0	60	30	0.7875	0.0125	0.1875	0.0125	67.5	45.69
17	20	23	1	1	0	0	1	1	1	0	0	0	1	0	80	40	0.5125	0.0375	0.4125	0.0375	92.5	45.69
19	32	34	1	1	0	0	1	0	0	1	0	0	1	0	80	30	0.8	0	0.2	0	70	39.42
20	37	39	1	1	0	0	1	1	1	0	0	0	1	0	50	20	0.6875	0.0125	0.275	0.025	57.5	45.69
20	37	39	1	1	0	0	1	1	1	0	0	0	1	0	60	20	0.725	0.025	0.225	0.025	60	45.69
23	25	25	0	1	0	0	1	0	0	1	0	0	1	0	90	40	0.825	0.0125	0.1625	0	67.5	39.42
23	34	34	0	1	0	0	1	0	0	1	0	0	1	0	70	30	0.65	0.0125	0.3375	0	55	39.42
25	39	41	1	1	0	0	1	1	1	0	0	0	1	0	40	15	0.6	0	0.3375	0.0625	50	45.69
25	32	32	0	1	0	0	1	1	1	0	0	0	1	0	80	30	0.7	0	0.2	0.1	65	45.69
26	26	29	1	1	0	0	1	1	1	0	0	0	1	0	40	25	0.6625	0	0.3375	0	50	45.69
30	51	51	0	1	0	0	1	0	0	1	0	0	1	0	70	15	0.725	0	0.275	0	42.5	39.42
30	39	41	1	1	0	0	1	0	0	1	0	0	1	0	80	40	0.65	0	0.35	0	70	39.42
31	37	37	0	1	0	0	1	1	1	0	0	0	1	0	80	40	0.75	0	0.25	0	65	45.69
31	34	37	1	1	0	0	1	1	1	0	0	0	1	0	80	30	0.85	0.0125	0.125	0.0125	70	45.69
34	46	48	1	1	0	0	1	0	0	1	0	0	1	0	80	20	0.8625	0	0.1375	0	65	39.42
34	59	59	0	1	0	0	1	1	1	0	0	0	1	0	60	25	0.85	0	0.15	0	50	45.69
40	65	67	1	1	0	0	1	1	1	0	0	0	1	0	50	20	0.8	0	0.2	0	45	45.69
41	44	46	1	1	0	0	1	1	1	0	0	0	1	0	70	25	0.85	0	0.15	0	57.5	45.69
44	53	56	1	1	0	0	1	1	1	0	0	0	1	0	90	40	0.65	0	0.35	0	72.5	45.69
44	51	51	0	1	0	0	1	0	0	1	0	0	1	0	80	40	0.825	0	0.175	0	75	39.42
46	48	51	1	1	0	0	1	1	1	0	0	0	1	0	70	30	0.8125	0	0.1875	0	57.5	45.69
47	56	59	1	1	0	0	1	1	1	0	0	0	1	0	70	30	0.7375	0	0.2625	0	52.5	45.69
51	53	56	1	1	0	0	1	1	1	0	0	0	1	0	60	25	0.875	0	0.125	0	55	45.69
54	56	59	1	1	0	0	1	1	1	0	0	0	1	0	90	30	0.8625	0	0.1375	0	60	45.69
56	78	78	0	1	0	0	1	0	0	1	0	0	1	0	120	20	0.85	0	0.15	0	62.5	39.42
59	78	80	1	1	0	0	1	1	1	0	0	0	1	0	80	30	0.8625	0	0.1375	0	67.5	45.69
61	69	69	0	1	0	0	1	1	1	0	0	0	1	0	100	20	0.8375	0	0.1625	0	67.5	45.69
66	72	76	1	1	0	0	1	1	1	0	0	0	1	0	90	40	0.8375	0	0.1625	0	62.5	45.69
68	68	71	1	1	0	0	1	0	0	1	0	0	1	0	70	30	0.8375	0	0.1625	0	57.5	39.42
69	72	74	1	1	0	0	1	1	1	0	0	0	1	0	230	110	0	0.1625	0.7375	0	0	45.69
5	7	11	1	1	0	1	0	0	0	1	0	1	0	0	75	15	71.25	1.25	27.5	0	42.5	68.16
6	11	11	0	1	0	1	0	1	1	0	0	1	0	0	40	15	46.25	6.25	46.25	1.25	18.75	76.71
7	12	12	0	1	0	1	0	1	1	0	0	1	0	0	80	35	62.5	20	16.25	0	53.75	76.71
13	15	18	1	1	0	1	0	0	0	1	0	1	0	0	130	25	53.75	31.25	6.25	0	58	68.16
18	34	36	1	1	0	1	0	0	0	1	0	1	0	0	100	30	58.75	0	41.25	0	77.5	68.16
19	25	25	0	1	0	1	0	0	0	1	0	1	0	0	160	160	6.25	53.75	7.5	0	110	68.16
20	25	26	1	1	0	1	0	1	1	0	0	1	0	0	123	32	36.25	43.75	5	3.75	70	76.71
33	36	39	1	1	0	1	0	0	0	1	0	1	0	0	103	35	26.25	42.5	10	0	56.25	68.16
41	55	55	0	1	0	1	0	1	1	0	0	1	0	0	130	21	91.25	0	2.5	5	45	76.71
42	53	55	1	1	0	1	0	0	0	1	0	1	0	0	130	30	62.5	0	17.5	5	48.75	68.16
42	57	57	0	1	0	1	0	1	1	0	0	1	0	0	152	59	46.25	0	7.5	7.5	26	76.71
48	50	53	1	1	0	1	0	1	1	0	0	1	0	0	245	42	21.25	11.25	1.25	2.5	70.75	76.71
62	67	70	1	1	0	1	0	1	1	0	0	1	0	0	92	23	83.75	0	0	0	37.5	76.71
13	23	29	1	1	0	1	0	1	1	0	0	1	0	0	36	5	5	7.5	0	62.5	9.62	76.71

## Sheet: INBU
FirstFound	LastPresent	LastChecked	Fate	Freq	SubHgt	NHgt	Y1P	YR2	YR3	TRT	PBG	ROT	CON	QUICK	BGAD	DREC	Grass	Forb	Lit	BG	VOR	CV
1	8	12	1	1	80	50	0	1	0	0	0	1	0	0	1	0	42.5	55	0	0	57.5	66.47
7	9	13	1	1	100	60	0	1	0	0	0	1	0	0	1	0	0	88.75	2.5	7.5	62.5	66.47
9	15	19	1	1	72	60	0	1	0	1	1	0	0	0	1	0	41.25	57.5	0	0	45	67.02
13	19	22	1	1	100	50	0	1	0	0	0	1	0	0	1	0	16.25	76.25	0	0	77.5	66.47
16	22	26	1	1	100	60	0	1	0	0	0	1	0	0	1	0	0	68.75	0	0	70	66.47
20	20	22	1	1	90	20	0	1	0	1	1	0	0	0	1	0	0	87.5	0	0	77.5	67.02
22	22	26	1	1	80	50	0	1	0	1	1	0	0	0	1	0	20	73.75	0	0	60	67.02
26	32	35	1	1	110	70	0	1	0	1	1	0	0	0	1	0	7.5	55	0	0	92.5	67.02
29	57	57	0	1	80	50	0	1	0	1	1	0	0	0	1	0	10	27.5	5	0	70	67.02
33	36	40	1	1	80	50	0	1	0	1	1	0	0	0	1	0	0	20	41.25	0	32.5	67.02
37	47	47	0	1	190	80	0	1	0	1	1	0	0	0	1	0	2.5	97.5	0	0	110	67.02
44	50	54	1	1	100	30	0	1	0	1	1	0	0	0	1	0	12.5	47.5	35	0	80	67.02
48	51	55	1	1	230	90	0	1	0	1	1	0	0	0	1	0	0	0	0	0	110	67.02
21	31	33	1	1	120	60	0	0	1	0	0	1	0	0	1	0	0	100	0	0	120	41.14
24	24	27	1	1	130	40	0	0	1	1	1	0	0	0	1	0	35	65	0	0	127.5	40.13
39	66	66	0	1	90	60	0	0	1	0	0	1	0	0	1	0	21.25	73.75	5	0	105	41.14
46	49	52	1	1	120	60	0	0	1	1	1	0	0	0	1	0	0	100	0	0	137.5	40.13
46	49	52	1	1	120	60	0	0	1	1	1	0	0	0	1	0	1.25	72.5	11.25	0	140	40.13
5	9	13	1	1	180	0	1	0	0	0	0	0	1	0	0	1	3.75	52.5	36.25	7.5	89.375	60.01
8	17	20	1	1	115	35	1	0	0	0	0	0	1	0	0	1	0	11.25	28.75	0	88.75	60.01
22	22	24	1	1	90	30	1	0	0	0	0	0	1	0	0	1	0	0	52.5	0	56.25	60.01
35	41	47	1	1	90	20	1	0	0	0	0	0	1	0	0	1	65	20	15	0	55	60.01
38	43	49	1	1	90	40	1	0	0	0	0	0	1	0	0	1	7.5	30	20	0	57.5	60.01
38	57	59	1	1	170	40	1	0	0	0	0	0	1	0	0	1	5	30	17.5	0	85	60.01
43	62	62	0	1	120	40	1	0	0	0	0	0	1	0	0	1	0	1.25	48.75	0	111.25	60.01
43	62	62	0	1	130	35	1	0	0	0	0	0	1	0	0	1	0	32.5	5	0	78.75	60.01
47	49	55	1	1	0	30	1	0	0	0	0	0	1	0	0	1	13.75	12.5	17.5	25	130	60.01
57	59	59	0	1	115	35	1	0	0	0	0	0	1	0	0	1	78.75	13.75	7.5	0	128.75	60.01
64	66	69	1	1	155	30	1	0	0	0	0	0	1	0	0	1	45	16.25	38.75	0	102.5	60.01
65	71	71	0	1	175	25	1	0	0	0	0	0	1	0	0	1	71.25	25	2.5	1.25	89.375	60.01
65	69	71	1	1	180	35	1	0	0	0	0	0	1	0	0	1	75	25	0	0	89.375	60.01
15	26	26	0	1	160	50	0	1	0	1	1	0	0	0	0	1	80	17.5	0	2.5	45	76.71
26	34	38	1	1	120	80	0	1	0	1	1	0	0	0	0	1	46.67	26.67	13.33	0	65	76.71
40	56	58	1	1	160	70	0	1	0	1	1	0	0	0	0	1	68.75	0	31.25	0	110	76.71
18	23	26	1	1	93	75	0	0	1	1	1	0	0	1	0	0	43.75	17.5	5	1.25	68.75	69.15
20	26	26	0	1	155	75	0	0	1	0	0	1	0	1	0	0	51.25	2.5	26.25	7.5	55	64.64
22	49	49	0	1	165	77	0	0	1	1	1	0	0	1	0	0	21.25	53.75	25	0	120	69.15
29	47	49	1	1	182	119	0	0	1	1	1	0	0	1	0	0	37.5	0	1.25	2.5	114.25	69.15
30	35	35	0	1	210	117	0	0	1	1	1	0	0	1	0	0	0	50	8.75	5	112	69.15
31	31	33	1	1	170	80	0	0	1	1	1	0	0	1	0	0	12.5	48.75	38.75	0	55	69.15
37	40	40	0	1	128	77	0	0	1	1	1	0	0	1	0	0	86.25	7.5	1.25	0	69.25	69.15

## Sheet: RWBL
FirstFound	LastPresent	LastChecked	Fate	Freq	SubHgt	NHgt	Y1P	YR2	YR3	TRT	PBG	ROT	CON	QUICK	DREC	BGAD	Grass	Forb	Lit	BG	VOR	CV
1	25	25	0	1	130	55	1	0	0	0	0	0	1	0	0	1	92.5	2.5	0	0	98.75	38.51
4	25	25	0	1	100	65	1	0	0	0	0	0	1	0	0	1	76.25	20	0	0	87.5	38.51
11	21	21	0	1	200	75	1	0	0	0	0	0	1	0	0	1	91.25	8.75	0	0	81.25	38.51
11	14	18	1	1	100	45	1	0	0	0	0	0	1	0	0	1	68.75	31.25	0	0	85	38.51
14	14	18	1	1	130	85	1	0	0	0	0	0	1	0	0	1	60	36.25	0	0	117.5	38.51
21	25	28	1	1	80	65	1	0	0	0	0	0	1	0	0	1	50	50	0	0	60	38.51
47	53	53	0	1	144	83	1	0	0	0	0	0	1	0	0	1	20	57	0	0	105	38.51
54	67	67	0	1	100	67	1	0	0	0	0	0	1	0	0	1	86	14	0	0	76	38.51
3	14	17	1	1	60	20	0	1	0	1	0	1	0	0	0	1	15	78.75	6.25	0	40	66.47
14	27	27	0	1	70	20	0	1	0	1	0	1	0	0	0	1	0	30	0	70	20	66.47
46	55	58	1	1	120	50	0	1	0	1	0	1	0	0	0	1	32.5	50	12.5	0	82.5	66.47
48	62	62	0	1	80	35	0	1	0	1	0	1	0	0	0	1	78.75	0	21.25	0	53.75	66.47
22	22	25	1	1	130	40	0	0	1	1	0	1	0	0	0	1	0	25	0	0	117.5	41.14
22	22	25	1	1	130	50	0	0	1	1	0	1	0	0	0	1	0	41.25	0	0	55	41.14
22	25	25	0	1	130	30	0	0	1	1	0	1	0	0	0	1	0	35	0	0	116.667	41.14
22	25	25	0	1	130	60	0	0	1	1	0	1	0	0	0	1	0	40	0	0	117.5	41.14
22	36	36	0	1	210	90	0	0	1	1	1	0	0	0	0	1	0	51.25	0	0	0	40.13
27	52	52	0	1	105	45	1	0	0	0	0	0	1	0	1	0	91.25	3.75	3.75	1.25	95	60.01
33	60	60	0	1	160	55	1	0	0	0	0	0	1	0	1	0	30	67.5	0	2.5	148.75	60.01
39	46	48	1	1	150	40	1	0	0	0	0	0	1	0	1	0	97.5	0	2.5	0	106.25	60.01
42	52	54	1	1	135	45	1	0	0	0	0	0	1	0	1	0	78.75	18.75	0	2.5	100	60.01
47	67	67	0	1	200	50	1	0	0	0	0	0	1	0	1	0	98.75	1.25	0	0	85	60.01
47	74	74	0	1	180	45	1	0	0	0	0	0	1	0	1	0	77.5	22.5	0	0	118.75	60.01
47	74	74	0	1	180	40	1	0	0	0	0	0	1	0	1	0	21.25	78.75	0	0	168.75	60.01
53	62	69	1	1	220	40	1	0	0	0	0	0	1	0	1	0	95	0	5	0	102.5	60.01
55	62	62	0	1	160	30	1	0	0	0	0	0	1	0	1	0	37.5	62.5	0	0	121.25	60.01
55	71	71	0	1	210	50	1	0	0	0	0	0	1	0	1	0	75	16.25	8.75	0	100	60.01
3	7	10	1	1	200	103	0	1	0	1	0	1	0	1	0	0	10	5	0	0	122.5	68.71
5	7	10	1	1	230	98	0	1	0	1	0	1	0	1	0	0	17.5	2.5	12.5	0	173	68.71
14	31	33	1	1	300	150	0	1	0	1	0	1	0	1	0	0	61.25	1.25	15	3.75	130	68.71
23	45	45	0	1	245	142	0	1	0	1	1	0	0	1	0	0	21.25	5	11.25	0	104.5	76.71
24	52	52	0	1	320	113	0	1	0	1	0	1	0	1	0	0	35	0	1.25	0	120.5	68.16
49	56	56	0	1	250	122	0	1	0	1	0	1	0	1	0	0	11.25	1.25	3.75	0	113.75	68.16
