# Supplementary material for: Effects of grazing strategy on facultative grassland bird nesting on native grassland pastures of the Mid-South USA
Source: PeerJ. 2022 Sep 28;10:e13968. doi: 10.7717/peerj.13968 (PMC9526412; doi:10.7717/peerj.13968)
Supplement: Supplemental Information 1 [file peerj-10-13968-s001.xlsx]

## Sheet: INBU2014
ID	Pasture	Year	use	TRT	Grass	Forb	Lit	BG	SubHgt
/*INBU01(2014_DREC)*/	DREC2A1	2014	1	CON	3.75	52.5	36.25	7.5	180
/*INBU02*/	DREC2A1	2014	1	CON	0	11.25	28.75	0	115
/*INBU03*/	DREC2B1	2014	1	CON	0	0	52.5	0	90
/*INBU04*/	DREC2B1	2014	1	CON	65	20	15	0	90
/*INBU05*/	DREC2B1	2014	1	CON	7.5	30	20	0	90
/*INBU06*/	DREC3B1	2014	1	CON	5	30	17.5	0	170
/*INBU07*/	DREC2C1	2014	1	CON	0	1.25	48.75	0	120
/*INBU08*/	DREC2C1	2014	1	CON	0	32.5	5	0	130
/*INBU09*/	DREC5C1	2014	1	CON	13.75	12.5	17.5	25	0
/*INBU10*/	DREC4C1	2014	1	CON	78.75	13.75	7.5	0	115
/*INBU12*/	DREC1C1	2014	1	CON	45	16.25	38.75	0	155
/*INBU14*/	DREC5C1	2014	1	CON	71.25	25	2.5	1.25	175
/*INBU15*/	DREC5C1	2014	1	CON	75	25	0	0	180
Pasture2A1	DREC2A1	2014	0	CON	15	5	5	5	30
Pasture2A1	DREC2A1	2014	0	CON	70	0	25	5	90
Pasture2A1	DREC2A1	2014	0	CON	95	0	5	0	70
Pasture2A1	DREC2A1	2014	0	CON	80	0	20	0	60
Pasture2A1	DREC2A1	2014	0	CON	30	0	45	20	55
Pasture2A1	DREC2A1	2014	0	CON	35	5	50	10	60
Pasture2A1	DREC2A1	2014	0	CON	25	5	70	0	35
Pasture2A1	DREC2A1	2014	0	CON	25	0	75	0	70
Pasture2A1	DREC2A1	2014	0	CON	30	5	65	0	70
Pasture2A1	DREC2A1	2014	0	CON	15	0	75	5	20
Pasture2A1	DREC2A1	2014	0	CON	80	0	20	0	85
Pasture2A1	DREC2A1	2014	0	CON	30	20	50	0	30
Pasture2A1	DREC2A1	2014	0	CON	50	0	45	5	25
Pasture2A1	DREC2A1	2014	0	CON	35	0	65	0	60
Pasture2A1	DREC2A1	2014	0	CON	10	0	70	20	25
Pasture2A1	DREC2A1	2014	0	CON	20	0	10	70	40
Pasture2A1	DREC2A1	2014	0	CON	20	5	65	10	40
Pasture2A1	DREC2A1	2014	0	CON	15	5	80	0	40
Pasture2A1	DREC2A1	2014	0	CON	20	0	75	5	40
Pasture2A1	DREC2A1	2014	0	CON	40	5	55	0	70
Pasture2A1	DREC2A1	2014	0	CON	10	5	85	0	70
Pasture2A1	DREC2A1	2014	0	CON	40	0	60	0	65
Pasture2A1	DREC2A1	2014	0	CON	40	5	55	0	25
Pasture2A1	DREC2A1	2014	0	CON	70	5	25	0	55
Pasture2B1	DREC2B1	2014	0	CON	90	0	10	0	20
Pasture2B1	DREC2B1	2014	0	CON	85	0	15	0	70
Pasture2B1	DREC2B1	2014	0	CON	50	0	50	0	80
Pasture2B1	DREC2B1	2014	0	CON	80	0	20	0	80
Pasture2B1	DREC2B1	2014	0	CON	25	0	70	5	15
Pasture2B1	DREC2B1	2014	0	CON	5	0	20	75	40
Pasture2B1	DREC2B1	2014	0	CON	50	0	50	0	70
Pasture2B1	DREC2B1	2014	0	CON	80	0	20	0	110
Pasture2B1	DREC2B1	2014	0	CON	80	0	20	0	80
Pasture2B1	DREC2B1	2014	0	CON	85	5	10	0	100
Pasture2B1	DREC2B1	2014	0	CON	95	0	5	0	80
Pasture2B1	DREC2B1	2014	0	CON	70	0	10	0	70
Pasture2B1	DREC2B1	2014	0	CON	65	0	20	15	45
Pasture2B1	DREC2B1	2014	0	CON	70	0	30	0	50
Pasture2B1	DREC2B1	2014	0	CON	85	0	15	0	55
Pasture2B1	DREC2B1	2014	0	CON	70	0	30	0	200
Pasture2B1	DREC2B1	2014	0	CON	85	0	15	0	90
Pasture2B1	DREC2B1	2014	0	CON	80	0	20	0	120
Pasture2B1	DREC2B1	2014	0	CON	70	0	25	5	50
Pasture2B1	DREC2B1	2014	0	CON	85	0	15	0	75
Pasture2B1	DREC2B1	2014	0	CON	15	0	25	60	60
Pasture2B1	DREC2B1	2014	0	CON	100	0	0	0	80
Pasture2B1	DREC2B1	2014	0	CON	60	0	40	0	75
Pasture2B1	DREC2B1	2014	0	CON	60	0	40	0	80
Pasture3B1	DREC3B1	2014	0	CON	75	5	20	0	65
Pasture3B1	DREC3B1	2014	0	CON	100	0	0	0	90
Pasture3B1	DREC3B1	2014	0	CON	40	5	55	0	50
Pasture3B1	DREC3B1	2014	0	CON	0	35	55	10	25
Pasture3B1	DREC3B1	2014	0	CON	20	10	70	0	70
Pasture3B1	DREC3B1	2014	0	CON	5	30	15	50	5
Pasture3B1	DREC3B1	2014	0	CON	60	40	0	0	90
Pasture3B1	DREC3B1	2014	0	CON	100	0	0	0	115
Pasture3B1	DREC3B1	2014	0	CON	70	15	15	0	65
Pasture3B1	DREC3B1	2014	0	CON	100	0	0	0	95
Pasture3B1	DREC3B1	2014	0	CON	100	0	0	0	105
Pasture3B1	DREC3B1	2014	0	CON	60	0	40	0	115
Pasture3B1	DREC3B1	2014	0	CON	5	0	10	0	30
Pasture3B1	DREC3B1	2014	0	CON	100	85	0	0	110
Pasture3B1	DREC3B1	2014	0	CON	100	0	0	0	85
Pasture3B1	DREC3B1	2014	0	CON	100	0	0	0	100
Pasture3B1	DREC3B1	2014	0	CON	100	0	0	0	100
Pasture3B1	DREC3B1	2014	0	CON	35	0	45	20	90
Pasture3B1	DREC3B1	2014	0	CON	75	0	20	5	70
Pasture3B1	DREC3B1	2014	0	CON	40	10	50	0	80
Pasture3B1	DREC3B1	2014	0	CON	60	0	40	0	80
Pasture3B1	DREC3B1	2014	0	CON	60	0	35	5	80
Pasture3B1	DREC3B1	2014	0	CON	40	0	55	5	80
Pasture3B1	DREC3B1	2014	0	CON	90	0	10	0	85
Pasture1C1	DREC1C1	2014	0	CON	50	0	0	50	70
Pasture1C1	DREC1C1	2014	0	CON	5	95	0	0	140
Pasture1C1	DREC1C1	2014	0	CON	100	0	0	0	115
Pasture1C1	DREC1C1	2014	0	CON	25	75	0	0	145
Pasture1C1	DREC1C1	2014	0	CON	100	0	0	0	100
Pasture1C1	DREC1C1	2014	0	CON	100	0	0	0	125
Pasture1C1	DREC1C1	2014	0	CON	60	0	30	10	35
Pasture1C1	DREC1C1	2014	0	CON	35	0	60	5	80
Pasture1C1	DREC1C1	2014	0	CON	45	0	50	5	70
Pasture1C1	DREC1C1	2014	0	CON	15	0	65	20	100
Pasture1C1	DREC1C1	2014	0	CON	15	5	80	0	225
Pasture1C1	DREC1C1	2014	0	CON	20	0	5	75	80
Pasture1C1	DREC1C1	2014	0	CON	30	5	65	0	10
Pasture1C1	DREC1C1	2014	0	CON	25	0	65	10	70
Pasture1C1	DREC1C1	2014	0	CON	45	0	55	0	80
Pasture1C1	DREC1C1	2014	0	CON	65	0	35	0	80
Pasture1C1	DREC1C1	2014	0	CON	80	0	20	0	90
Pasture1C1	DREC1C1	2014	0	CON	60	0	40	0	90
Pasture1C1	DREC1C1	2014	0	CON	10	40	25	15	70
Pasture1C1	DREC1C1	2014	0	CON	20	0	80	0	40
Pasture1C1	DREC1C1	2014	0	CON	50	0	25	25	115
Pasture1C1	DREC1C1	2014	0	CON	100	0	0	0	150
Pasture1C1	DREC1C1	2014	0	CON	100	0	0	0	155
Pasture1C1	DREC1C1	2014	0	CON	100	0	0	0	150
Pasture2C1	DREC2C1	2014	0	CON	50	0	25	25	120
Pasture2C1	DREC2C1	2014	0	CON	70	0	30	0	95
Pasture2C1	DREC2C1	2014	0	CON	100	0	0	0	120
Pasture2C1	DREC2C1	2014	0	CON	100	0	0	0	125
Pasture2C1	DREC2C1	2014	0	CON	100	0	0	0	200
Pasture2C1	DREC2C1	2014	0	CON	100	0	0	0	95
Pasture2C1	DREC2C1	2014	0	CON	90	0	10	0	70
Pasture2C1	DREC2C1	2014	0	CON	100	0	0	0	130
Pasture2C1	DREC2C1	2014	0	CON	100	0	0	0	65
Pasture2C1	DREC2C1	2014	0	CON	90	0	0	10	85
Pasture2C1	DREC2C1	2014	0	CON	100	0	0	0	120
Pasture2C1	DREC2C1	2014	0	CON	100	0	0	0	125
Pasture2C1	DREC2C1	2014	0	CON	80	0	15	5	110
Pasture2C1	DREC2C1	2014	0	CON	30	0	65	5	220
Pasture2C1	DREC2C1	2014	0	CON	100	0	0	0	140
Pasture2C1	DREC2C1	2014	0	CON	100	0	0	0	165
Pasture2C1	DREC2C1	2014	0	CON	100	0	0	0	130
Pasture2C1	DREC2C1	2014	0	CON	100	0	0	0	130
Pasture2C1	DREC2C1	2014	0	CON	90	0	10	0	70
Pasture2C1	DREC2C1	2014	0	CON	60	0	40	0	115
Pasture2C1	DREC2C1	2014	0	CON	70	0	30	0	120
Pasture2C1	DREC2C1	2014	0	CON	85	0	15	0	115
Pasture2C1	DREC2C1	2014	0	CON	80	20	0	0	130
Pasture2C1	DREC2C1	2014	0	CON	40	0	60	0	140
Pasture2C1	DREC2C1	2014	0	CON	100	0	0	0	120
Pasture2C1	DREC2C1	2014	0	CON	70	0	30	0	160
Pasture2C1	DREC2C1	2014	0	CON	100	0	0	0	110
Pasture2C1	DREC2C1	2014	0	CON	80	0	20	0	90
Pasture2C1	DREC2C1	2014	0	CON	80	0	20	0	115
Pasture2C1	DREC2C1	2014	0	CON	100	0	0	0	145
Pasture2C1	DREC2C1	2014	0	CON	75	0	10	15	90
Pasture2C1	DREC2C1	2014	0	CON	100	0	0	0	100
Pasture2C1	DREC2C1	2014	0	CON	100	0	0	0	155
Pasture2C1	DREC2C1	2014	0	CON	100	0	0	0	120
Pasture2C1	DREC2C1	2014	0	CON	60	0	40	0	155
Pasture2C1	DREC2C1	2014	0	CON	70	0	20	10	110
Pasture4C1	DREC4C1	2014	0	CON	100	0	0	0	80
Pasture4C1	DREC4C1	2014	0	CON	70	0	0	30	0
Pasture4C1	DREC4C1	2014	0	CON	80	0	20	0	95
Pasture4C1	DREC4C1	2014	0	CON	80	0	10	10	75
Pasture4C1	DREC4C1	2014	0	CON	70	20	10	0	60
Pasture4C1	DREC4C1	2014	0	CON	85	0	10	5	120
Pasture4C1	DREC4C1	2014	0	CON	50	0	50	0	30
Pasture4C1	DREC4C1	2014	0	CON	100	0	0	0	90
Pasture4C1	DREC4C1	2014	0	CON	100	0	0	0	80
Pasture4C1	DREC4C1	2014	0	CON	90	0	10	0	90
Pasture4C1	DREC4C1	2014	0	CON	90	0	10	0	90
Pasture4C1	DREC4C1	2014	0	CON	100	0	0	0	110
Pasture4C1	DREC4C1	2014	0	CON	70	0	30	0	50
Pasture4C1	DREC4C1	2014	0	CON	60	0	40	0	95
Pasture4C1	DREC4C1	2014	0	CON	90	0	10	0	85
Pasture4C1	DREC4C1	2014	0	CON	80	0	20	0	55
Pasture4C1	DREC4C1	2014	0	CON	95	5	0	0	85
Pasture4C1	DREC4C1	2014	0	CON	80	0	20	0	70
Pasture4C1	DREC4C1	2014	0	CON	80	0	15	5	50
Pasture4C1	DREC4C1	2014	0	CON	95	0	5	0	70
Pasture4C1	DREC4C1	2014	0	CON	50	0	50	0	50
Pasture4C1	DREC4C1	2014	0	CON	55	0	40	5	55
Pasture4C1	DREC4C1	2014	0	CON	70	0	10	20	90
Pasture4C1	DREC4C1	2014	0	CON	50	0	50	0	50
Pasture5C1	DREC5C1	2014	0	CON	50	0	0	50	0
Pasture5C1	DREC5C1	2014	0	CON	95	5	0	0	110
Pasture5C1	DREC5C1	2014	0	CON	95	5	0	0	90
Pasture5C1	DREC5C1	2014	0	CON	100	0	0	0	120
Pasture5C1	DREC5C1	2014	0	CON	90	10	0	0	90
Pasture5C1	DREC5C1	2014	0	CON	85	5	0	10	50
Pasture5C1	DREC5C1	2014	0	CON	40	0	50	10	80
Pasture5C1	DREC5C1	2014	0	CON	100	0	0	0	100
Pasture5C1	DREC5C1	2014	0	CON	80	0	10	10	90
Pasture5C1	DREC5C1	2014	0	CON	85	0	0	15	110
Pasture5C1	DREC5C1	2014	0	CON	80	0	10	10	90
Pasture5C1	DREC5C1	2014	0	CON	90	0	10	0	75
Pasture5C1	DREC5C1	2014	0	CON	80	0	20	0	80
Pasture5C1	DREC5C1	2014	0	CON	100	0	0	0	100
Pasture5C1	DREC5C1	2014	0	CON	100	0	0	0	90
Pasture5C1	DREC5C1	2014	0	CON	100	0	0	0	85
Pasture5C1	DREC5C1	2014	0	CON	100	0	0	0	95
Pasture5C1	DREC5C1	2014	0	CON	95	0	0	5	110
Pasture5C1	DREC5C1	2014	0	CON	25	15	0	60	70
Pasture5C1	DREC5C1	2014	0	CON	100	0	0	0	100
Pasture5C1	DREC5C1	2014	0	CON	70	5	0	25	130
Pasture5C1	DREC5C1	2014	0	CON	10	40	5	45	155
Pasture5C1	DREC5C1	2014	0	CON	5	20	10	65	110
Pasture5C1	DREC5C1	2014	0	CON	10	45	30	15	130
Pasture5C1	DREC5C1	2014	0	CON	10	0	0	90	90
Pasture5C1	DREC5C1	2014	0	CON	50	0	25	25	120
Pasture5C1	DREC5C1	2014	0	CON	100	0	0	0	105
Pasture5C1	DREC5C1	2014	0	CON	100	0	0	0	120
Pasture5C1	DREC5C1	2014	0	CON	10	45	0	45	110
Pasture5C1	DREC5C1	2014	0	CON	0	10	90	0	35

## Sheet: INBU2015
ID	Pasture	Year	use	TRT	Grass	Forb	Lit	BG	SubHgt
/*INBU01(2015_BGAD)*/	BGAD4A2	2015	1	ROT	42.5	55	0	0	80
/*INBU02*/	BGAD4A2	2015	1	ROT	0	88.75	2.5	7.5	100
/*INBU03*/	BGAD3A2	2015	1	PBG	41.25	57.5	0	0	72
/*INBU04*/	BGAD5A2	2015	1	ROT	16.25	76.25	0	0	100
/*INBU05*/	BGAD4B2	2015	1	ROT	0	68.75	0	0	100
/*INBU06*/	BGAD6A2	2015	1	PBG	0	87.5	0	0	90
/*INBU07*/	BGAD6A2	2015	1	PBG	20	73.75	0	0	80
/*INBU09*/	BGAD3B2	2015	1	PBG	7.5	55	0	0	110
/*INBU10*/	BGAD6B2	2015	1	PBG	10	27.5	5	0	80
/*INBU11*/	BGAD3B2	2015	1	PBG	0	20	41.25	0	80
/*INBU13*/	BGAD6B2	2015	1	PBG	2.5	97.5	0	0	190
/*INBU14*/	BGAD3B2	2015	1	PBG	12.5	47.5	35	0	100
/*INBU16*/	BGAD3C2	2015	1	PBG	0	0	0	0	230
/*INBU01(2015_DREC)*/	DREC3A2	2015	1	PBG	80	17.5	0	2.5	160
/*INBU03*/	DREC3A2	2015	1	PBG	46.67	26.67	13.33	0	120
/*INBU04*/	DREC4B2	2015	1	PBG	68.75	0	31.25	0	160
Pasture4A2	BGAD4A2	2015	0	ROT	85	20	15	0	10
Pasture4A2	BGAD4A2	2015	0	ROT	10	0	90	0	30
Pasture4A2	BGAD4A2	2015	0	ROT	75	10	15	0	30
Pasture4A2	BGAD4A2	2015	0	ROT	25	0	70	0	10
Pasture4A2	BGAD4A2	2015	0	ROT	50	0	50	0	0
Pasture4A2	BGAD4A2	2015	0	ROT	35	25	30	0	20
Pasture4A2	BGAD4A2	2015	0	ROT	0	0	95	5	0
Pasture4A2	BGAD4A2	2015	0	ROT	50	45	0	5	30
Pasture4A2	BGAD4A2	2015	0	ROT	5	25	20	0	30
Pasture4A2	BGAD4A2	2015	0	ROT	10	30	60	0	50
Pasture4A2	BGAD4A2	2015	0	ROT	0	65	35	0	10
Pasture4A2	BGAD4A2	2015	0	ROT	25	15	60	0	40
Pasture4A2	BGAD4A2	2015	0	ROT	30	0	70	0	20
Pasture4A2	BGAD4A2	2015	0	ROT	90	5	5	0	30
Pasture4A2	BGAD4A2	2015	0	ROT	55	45	0	0	30
Pasture4A2	BGAD4A2	2015	0	ROT	15	80	5	0	40
Pasture4A2	BGAD4A2	2015	0	ROT	100	0	0	0	50
Pasture4A2	BGAD4A2	2015	0	ROT	30	30	40	0	20
Pasture4A2	BGAD4A2	2015	0	ROT	0	25	75	0	0
Pasture4A2	BGAD4A2	2015	0	ROT	35	20	35	0	20
Pasture4A2	BGAD4A2	2015	0	ROT	20	50	30	0	20
Pasture4A2	BGAD4A2	2015	0	ROT	40	50	10	0	30
Pasture4A2	BGAD4A2	2015	0	ROT	15	5	80	0	40
Pasture4A2	BGAD4A2	2015	0	ROT	70	0	30	0	30
Pasture4A2	BGAD4A2	2015	0	ROT	100	0	0	0	90
Pasture4A2	BGAD4A2	2015	0	ROT	55	40	5	0	30
Pasture4A2	BGAD4A2	2015	0	ROT	10	30	60	0	40
Pasture4A2	BGAD4A2	2015	0	ROT	80	0	20	0	50
Pasture4A2	BGAD4A2	2015	0	ROT	15	5	80	0	60
Pasture4A2	BGAD4A2	2015	0	ROT	70	0	30	0	30
Pasture4A2	BGAD4A2	2015	0	ROT	60	20	15	5	30
Pasture4A2	BGAD4A2	2015	0	ROT	65	20	15	0	20
Pasture4A2	BGAD4A2	2015	0	ROT	60	10	30	0	50
Pasture4A2	BGAD4A2	2015	0	ROT	50	0	50	0	50
Pasture4A2	BGAD4A2	2015	0	ROT	60	40	0	0	30
Pasture4A2	BGAD4A2	2015	0	ROT	25	15	60	0	100
Pasture3A2	BGAD3A2	2015	0	PB	20	5	75	0	0
Pasture3A2	BGAD3A2	2015	0	PB	60	0	40	0	40
Pasture3A2	BGAD3A2	2015	0	PB	60	5	40	0	30
Pasture3A2	BGAD3A2	2015	0	PB	70	5	30	0	40
Pasture3A2	BGAD3A2	2015	0	PB	80	0	40	0	30
Pasture3A2	BGAD3A2	2015	0	PB	50	5	40	5	0
Pasture3A2	BGAD3A2	2015	0	PB	10	40	50	0	10
Pasture3A2	BGAD3A2	2015	0	PB	5	30	65	0	30
Pasture3A2	BGAD3A2	2015	0	PB	70	0	30	0	30
Pasture3A2	BGAD3A2	2015	0	PB	85	0	15	0	30
Pasture3A2	BGAD3A2	2015	0	PB	95	0	5	0	40
Pasture3A2	BGAD3A2	2015	0	PB	85	10	5	0	50
Pasture3A2	BGAD3A2	2015	0	PB	50	0	50	0	5
Pasture3A2	BGAD3A2	2015	0	PB	55	30	15	0	60
Pasture3A2	BGAD3A2	2015	0	PB	15	15	70	0	20
Pasture3A2	BGAD3A2	2015	0	PB	50	10	40	0	40
Pasture3A2	BGAD3A2	2015	0	PB	60	30	10	0	60
Pasture3A2	BGAD3A2	2015	0	PB	100	0	0	0	40
Pasture3A2	BGAD3A2	2015	0	PB	50	30	20	0	40
Pasture3A2	BGAD3A2	2015	0	PB	35	30	35	0	40
Pasture3A2	BGAD3A2	2015	0	PB	60	10	30	0	30
Pasture3A2	BGAD3A2	2015	0	PB	70	20	10	0	60
Pasture3A2	BGAD3A2	2015	0	PB	85	10	5	0	60
Pasture3A2	BGAD3A2	2015	0	PB	25	75	0	0	20
Pasture3A2	BGAD3A2	2015	0	PB	10	20	70	0	40
Pasture3A2	BGAD3A2	2015	0	PB	10	15	75	0	30
Pasture3A2	BGAD3A2	2015	0	PB	5	65	30	0	50
Pasture3A2	BGAD3A2	2015	0	PB	45	40	15	0	50
Pasture3A2	BGAD3A2	2015	0	PB	35	40	25	0	50
Pasture3A2	BGAD3A2	2015	0	PB	50	5	45	0	50
Pasture3A2	BGAD3A2	2015	0	PB	95	5	0	0	80
Pasture3A2	BGAD3A2	2015	0	PB	75	20	5	0	50
Pasture3A2	BGAD3A2	2015	0	PB	5	80	15	0	50
Pasture3A2	BGAD3A2	2015	0	PB	15	45	40	0	70
Pasture3A2	BGAD3A2	2015	0	PB	85	15	0	0	50
Pasture3A2	BGAD3A2	2015	0	PB	80	0	20	0	50
Pasture5A2	BGAD5A2	2015	0	ROT	90	0	10	0	20
Pasture5A2	BGAD5A2	2015	0	ROT	60	10	30	0	20
Pasture5A2	BGAD5A2	2015	0	ROT	30	5	65	0	20
Pasture5A2	BGAD5A2	2015	0	ROT	45	15	40	0	40
Pasture5A2	BGAD5A2	2015	0	ROT	80	0	20	0	40
Pasture5A2	BGAD5A2	2015	0	ROT	100	0	0	0	60
Pasture5A2	BGAD5A2	2015	0	ROT	70	10	20	0	20
Pasture5A2	BGAD5A2	2015	0	ROT	70	20	10	0	40
Pasture5A2	BGAD5A2	2015	0	ROT	5	70	20	0	30
Pasture5A2	BGAD5A2	2015	0	ROT	70	20	10	0	30
Pasture5A2	BGAD5A2	2015	0	ROT	70	20	10	0	30
Pasture5A2	BGAD5A2	2015	0	ROT	5	80	15	0	40
Pasture5A2	BGAD5A2	2015	0	ROT	0	0	0	100	0
Pasture5A2	BGAD5A2	2015	0	ROT	50	40	10	0	30
Pasture5A2	BGAD5A2	2015	0	ROT	20	0	80	0	10
Pasture5A2	BGAD5A2	2015	0	ROT	60	5	35	0	20
Pasture5A2	BGAD5A2	2015	0	ROT	60	20	20	0	20
Pasture5A2	BGAD5A2	2015	0	ROT	50	30	20	0	20
Pasture5A2	BGAD5A2	2015	0	ROT	50	0	50	0	40
Pasture5A2	BGAD5A2	2015	0	ROT	10	20	70	0	20
Pasture5A2	BGAD5A2	2015	0	ROT	35	50	15	0	30
Pasture5A2	BGAD5A2	2015	0	ROT	35	15	50	0	40
Pasture5A2	BGAD5A2	2015	0	ROT	10	60	20	0	0
Pasture5A2	BGAD5A2	2015	0	ROT	10	80	10	0	30
Pasture6A2	BGAD6A2	2015	0	PB	30	0	0	70	40
Pasture6A2	BGAD6A2	2015	0	PB	25	5	0	70	0
Pasture6A2	BGAD6A2	2015	0	PB	20	20	0	60	30
Pasture6A2	BGAD6A2	2015	0	PB	20	20	0	60	30
Pasture6A2	BGAD6A2	2015	0	PB	45	5	0	50	20
Pasture6A2	BGAD6A2	2015	0	PB	50	20	0	30	10
Pasture6A2	BGAD6A2	2015	0	PB	70	15	15	0	20
Pasture6A2	BGAD6A2	2015	0	PB	15	55	10	20	30
Pasture6A2	BGAD6A2	2015	0	PB	20	20	60	0	20
Pasture6A2	BGAD6A2	2015	0	PB	35	15	35	15	40
Pasture6A2	BGAD6A2	2015	0	PB	20	10	70	0	30
Pasture6A2	BGAD6A2	2015	0	PB	5	5	95	0	20
Pasture6A2	BGAD6A2	2015	0	PB	100	0	0	0	50
Pasture6A2	BGAD6A2	2015	0	PB	60	0	40	0	50
Pasture6A2	BGAD6A2	2015	0	PB	80	5	15	0	40
Pasture6A2	BGAD6A2	2015	0	PB	10	15	75	0	40
Pasture6A2	BGAD6A2	2015	0	PB	90	0	10	0	40
Pasture6A2	BGAD6A2	2015	0	PB	25	25	50	0	30
Pasture6A2	BGAD6A2	2015	0	PB	50	0	0	50	20
Pasture6A2	BGAD6A2	2015	0	PB	50	0	0	50	20
Pasture6A2	BGAD6A2	2015	0	PB	50	0	30	20	30
Pasture6A2	BGAD6A2	2015	0	PB	45	5	10	40	40
Pasture6A2	BGAD6A2	2015	0	PB	30	0	70	0	10
Pasture6A2	BGAD6A2	2015	0	PB	60	0	20	20	10
Pasture6B2	BGAD6B2	2015	0	PB	60	10	30	0	30
Pasture6B2	BGAD6B2	2015	0	PB	50	15	35	0	50
Pasture6B2	BGAD6B2	2015	0	PB	50	5	45	0	20
Pasture6B2	BGAD6B2	2015	0	PB	15	5	80	0	0
Pasture6B2	BGAD6B2	2015	0	PB	60	0	40	0	10
Pasture6B2	BGAD6B2	2015	0	PB	25	50	25	0	40
Pasture6B2	BGAD6B2	2015	0	PB	50	0	10	40	0
Pasture6B2	BGAD6B2	2015	0	PB	65	5	0	30	20
Pasture6B2	BGAD6B2	2015	0	PB	60	10	0	30	30
Pasture6B2	BGAD6B2	2015	0	PB	40	0	0	60	10
Pasture6B2	BGAD6B2	2015	0	PB	25	25	0	50	30
Pasture6B2	BGAD6B2	2015	0	PB	20	5	0	75	10
Pasture6B2	BGAD6B2	2015	0	PB	45	50	5	0	40
Pasture6B2	BGAD6B2	2015	0	PB	20	50	30	0	50
Pasture6B2	BGAD6B2	2015	0	PB	50	25	25	0	50
Pasture6B2	BGAD6B2	2015	0	PB	30	30	40	0	40
Pasture6B2	BGAD6B2	2015	0	PB	25	35	40	0	20
Pasture6B2	BGAD6B2	2015	0	PB	30	40	30	0	60
Pasture6B2	BGAD6B2	2015	0	PB	90	0	10	0	40
Pasture6B2	BGAD6B2	2015	0	PB	65	25	10	0	50
Pasture6B2	BGAD6B2	2015	0	PB	50	50	50	0	40
Pasture6B2	BGAD6B2	2015	0	PB	40	30	30	0	40
Pasture6B2	BGAD6B2	2015	0	PB	60	40	0	0	30
Pasture6B2	BGAD6B2	2015	0	PB	40	20	40	0	20
Pasture6B2	BGAD6B2	2015	0	PB	60	30	0	10	30
Pasture6B2	BGAD6B2	2015	0	PB	65	5	0	30	20
Pasture6B2	BGAD6B2	2015	0	PB	0	40	0	60	40
Pasture6B2	BGAD6B2	2015	0	PB	15	50	0	35	50
Pasture6B2	BGAD6B2	2015	0	PB	0	25	75	0	10
Pasture6B2	BGAD6B2	2015	0	PB	5	15	80	0	0
Pasture3B2	BGAD3B2	2015	0	PB	35	0	65	0	10
Pasture3B2	BGAD3B2	2015	0	PB	75	0	25	0	10
Pasture3B2	BGAD3B2	2015	0	PB	75	5	20	0	20
Pasture3B2	BGAD3B2	2015	0	PB	40	0	60	0	20
Pasture3B2	BGAD3B2	2015	0	PB	65	15	20	0	30
Pasture3B2	BGAD3B2	2015	0	PB	80	5	15	0	20
Pasture3B2	BGAD3B2	2015	0	PB	15	0	85	0	0
Pasture3B2	BGAD3B2	2015	0	PB	20	20	60	0	20
Pasture3B2	BGAD3B2	2015	0	PB	80	0	20	0	10
Pasture3B2	BGAD3B2	2015	0	PB	65	15	25	0	10
Pasture3B2	BGAD3B2	2015	0	PB	40	5	50	0	20
Pasture3B2	BGAD3B2	2015	0	PB	70	0	30	0	70
Pasture3B2	BGAD3B2	2015	0	PB	25	5	70	0	0
Pasture3B2	BGAD3B2	2015	0	PB	15	15	70	0	0
Pasture3B2	BGAD3B2	2015	0	PB	60	20	20	0	50
Pasture3B2	BGAD3B2	2015	0	PB	85	5	10	0	30
Pasture3B2	BGAD3B2	2015	0	PB	15	5	80	0	10
Pasture3B2	BGAD3B2	2015	0	PB	10	90	0	0	10
Pasture3B2	BGAD3B2	2015	0	PB	20	20	60	0	10
Pasture3B2	BGAD3B2	2015	0	PB	40	60	10	0	80
Pasture3B2	BGAD3B2	2015	0	PB	30	60	10	0	70
Pasture3B2	BGAD3B2	2015	0	PB	0	0	100	0	40
Pasture3B2	BGAD3B2	2015	0	PB	40	10	50	0	10
Pasture3B2	BGAD3B2	2015	0	PB	50	40	10	0	30
Pasture3B2	BGAD3B2	2015	0	PB	25	5	60	0	20
Pasture3B2	BGAD3B2	2015	0	PB	30	10	60	0	10
Pasture3B2	BGAD3B2	2015	0	PB	50	0	40	0	10
Pasture3B2	BGAD3B2	2015	0	PB	60	0	40	0	30
Pasture3B2	BGAD3B2	2015	0	PB	35	5	60	0	30
Pasture3B2	BGAD3B2	2015	0	PB	60	20	20	0	20
Pasture3B2	BGAD3B2	2015	0	PB	70	30	0	0	60
Pasture3B2	BGAD3B2	2015	0	PB	10	70	15	0	140
Pasture3B2	BGAD3B2	2015	0	PB	35	25	30	0	20
Pasture3B2	BGAD3B2	2015	0	PB	60	40	0	0	50
Pasture3B2	BGAD3B2	2015	0	PB	25	65	10	0	20
Pasture3C2	BGAD3C2	2015	0	PB	85	0	15	0	10
Pasture3C2	BGAD3C2	2015	0	PB	80	0	20	0	15
Pasture3C2	BGAD3C2	2015	0	PB	80	20	0	0	5
Pasture3C2	BGAD3C2	2015	0	PB	90	10	0	0	20
Pasture3C2	BGAD3C2	2015	0	PB	50	20	0	0	20
Pasture3C2	BGAD3C2	2015	0	PB	60	40	0	0	30
Pasture3C2	BGAD3C2	2015	0	PB	60	10	0	30	30
Pasture3C2	BGAD3C2	2015	0	PB	30	10	60	0	35
Pasture3C2	BGAD3C2	2015	0	PB	70	20	5	5	10
Pasture3C2	BGAD3C2	2015	0	PB	20	40	40	0	30
Pasture3C2	BGAD3C2	2015	0	PB	30	20	40	10	20
Pasture3C2	BGAD3C2	2015	0	PB	35	5	60	0	25
Pasture3C2	BGAD3C2	2015	0	PB	45	55	0	0	30
Pasture3C2	BGAD3C2	2015	0	PB	50	0	50	0	15
Pasture3C2	BGAD3C2	2015	0	PB	50	0	50	0	15
Pasture3C2	BGAD3C2	2015	0	PB	55	5	40	0	10
Pasture3C2	BGAD3C2	2015	0	PB	40	10	40	10	10
Pasture3C2	BGAD3C2	2015	0	PB	20	10	40	30	40
Pasture3C2	BGAD3C2	2015	0	PB	60	0	40	0	40
Pasture3C2	BGAD3C2	2015	0	PB	60	0	40	0	20
Pasture3C2	BGAD3C2	2015	0	PB	40	0	60	0	20
Pasture3C2	BGAD3C2	2015	0	PB	5	0	0	95	5
Pasture3C2	BGAD3C2	2015	0	PB	40	40	20	0	30
Pasture3C2	BGAD3C2	2015	0	PB	50	0	0	50	10
Pasture3C2	BGAD3C2	2015	0	PB	10	0	20	70	10
Pasture3C2	BGAD3C2	2015	0	PB	80	0	20	0	15
Pasture3C2	BGAD3C2	2015	0	PB	70	0	30	0	20
Pasture3C2	BGAD3C2	2015	0	PB	10	0	0	90	10
Pasture3C2	BGAD3C2	2015	0	PB	85	5	0	10	15
Pasture3C2	BGAD3C2	2015	0	PB	50	20	10	20	35
Pasture3C2	BGAD3C2	2015	0	PB	20	20	20	40	15
Pasture3C2	BGAD3C2	2015	0	PB	20	0	80	0	40
Pasture3C2	BGAD3C2	2015	0	PB	60	0	30	10	20
Pasture3C2	BGAD3C2	2015	0	PB	70	0	20	10	15
Pasture3C2	BGAD3C2	2015	0	PB	20	0	80	0	50
Pasture3C2	BGAD3C2	2015	0	PB	80	0	20	0	20
Pasture3C2	BGAD3C2	2015	0	PB	70	0	25	5	20
Pasture3A2	DREC3A2	2015	0	PBG	0	20	0	80	0
Pasture3A2	DREC3A2	2015	0	PBG	5	20	0	75	0
Pasture3A2	DREC3A2	2015	0	PBG	20	10	0	70	20
Pasture3A2	DREC3A2	2015	0	PBG	30	0	10	60	20
Pasture3A2	DREC3A2	2015	0	PBG	20	0	0	80	20
Pasture3A2	DREC3A2	2015	0	PBG	20	10	0	70	25
Pasture3A2	DREC3A2	2015	0	PBG	95	0	0	5	40
Pasture3A2	DREC3A2	2015	0	PBG	40	0	0	60	30
Pasture3A2	DREC3A2	2015	0	PBG	45	5	0	50	30
Pasture3A2	DREC3A2	2015	0	PBG	80	0	0	20	45
Pasture3A2	DREC3A2	2015	0	PBG	60	10	0	30	25
Pasture3A2	DREC3A2	2015	0	PBG	90	0	0	10	40
Pasture3A2	DREC3A2	2015	0	PBG	40	0	60	0	40
Pasture3A2	DREC3A2	2015	0	PBG	20	0	80	0	30
Pasture3A2	DREC3A2	2015	0	PBG	10	0	90	0	20
Pasture3A2	DREC3A2	2015	0	PBG	90	0	10	0	55
Pasture3A2	DREC3A2	2015	0	PBG	80	0	40	0	40
Pasture3A2	DREC3A2	2015	0	PBG	60	0	40	0	50
Pasture3A2	DREC3A2	2015	0	PBG	50	0	50	0	40
Pasture3A2	DREC3A2	2015	0	PBG	0	5	95	0	0
Pasture3A2	DREC3A2	2015	0	PBG	60	0	40	0	30
Pasture3A2	DREC3A2	2015	0	PBG	90	0	10	0	60
Pasture3A2	DREC3A2	2015	0	PBG	80	0	20	0	25
Pasture3A2	DREC3A2	2015	0	PBG	5	0	95	0	20
Pasture4B2	DREC4B2	2015	0	PBG	60	5	0	35	15
Pasture4B2	DREC4B2	2015	0	PBG	75	0	25	0	20
Pasture4B2	DREC4B2	2015	0	PBG	70	15	5	10	5
Pasture4B2	DREC4B2	2015	0	PBG	65	5	5	25	10
Pasture4B2	DREC4B2	2015	0	PBG	30	0	0	70	5
Pasture4B2	DREC4B2	2015	0	PBG	45	0	0	55	25
Pasture4B2	DREC4B2	2015	0	PBG	70	0	30	0	50
Pasture4B2	DREC4B2	2015	0	PBG	80	0	20	0	55
Pasture4B2	DREC4B2	2015	0	PBG	0	0	85	15	0
Pasture4B2	DREC4B2	2015	0	PBG	50	0	50	0	40
Pasture4B2	DREC4B2	2015	0	PBG	65	0	35	0	80
Pasture4B2	DREC4B2	2015	0	PBG	35	0	65	0	40
Pasture4B2	DREC4B2	2015	0	PBG	80	0	20	0	40
Pasture4B2	DREC4B2	2015	0	PBG	60	0	40	0	85
Pasture4B2	DREC4B2	2015	0	PBG	40	0	60	0	75
Pasture4B2	DREC4B2	2015	0	PBG	30	0	70	0	20
Pasture4B2	DREC4B2	2015	0	PBG	20	0	80	0	80
Pasture4B2	DREC4B2	2015	0	PBG	80	0	20	0	75
Pasture4B2	DREC4B2	2015	0	PBG	55	0	45	0	40
Pasture4B2	DREC4B2	2015	0	PBG	30	5	65	0	60
Pasture4B2	DREC4B2	2015	0	PBG	30	0	70	0	70
Pasture4B2	DREC4B2	2015	0	PBG	40	0	60	0	20
Pasture4B2	DREC4B2	2015	0	PBG	50	0	50	0	100
Pasture4B2	DREC4B2	2015	0	PBG	70	0	30	0	60

## Sheet: INBU2016
ID	Pasture	Year	TRT	Grass	Forb	Lit	BG	SubHgt	use
/*INBU01(2016_BGAD)*/	BGAD4B3	2016	ROT	0	100	0	0	120	1
/*INBU02*/	BGAD3B3	2016	PBG	35	65	0	0	130	1
/*INBU03*/	BGAD4B3	2016	ROT	21.25	73.75	5	0	90	1
/*INBU04*/	BGAD6B3	2016	PBG	0	100	0	0	120	1
/*INBU05*/	BGAD6B3	2016	PBG	1.25	72.5	11.25	0	120	1
/*INBU02(2016_QUICK)*/	QUICK3B3	2016	PBG	43.75	17.5	5	1.25	93	1
/*INBU03*/	QUICK4B3	2016	ROT	51.25	2.5	26.25	7.5	155	1
/*INBU04*/	QUICK1B3	2016	PBG	21.25	53.75	25	0	165	1
/*INBU05*/	QUICK3B3	2016	PBG	37.5	0	1.25	2.5	182	1
/*INBU06*/	QUICK3B3	2016	PBG	0	50	8.75	5	210	1
/*INBU07*/	QUICK1B3	2016	PBG	12.5	48.75	38.75	0	170	1
/*INBU08*/	QUICK3B3	2016	PBG	86.25	7.5	1.25	0	128	1
Pasture4B3	BGAD4B3	2016	ROT	80	0	20	0	40	0
Pasture4B3	BGAD4B3	2016	ROT	55	5	40	0	40	0
Pasture4B3	BGAD4B3	2016	ROT	55	0	30	15	30	0
Pasture4B3	BGAD4B3	2016	ROT	70	0	30	0	30	0
Pasture4B3	BGAD4B3	2016	ROT	70	0	30	0	50	0
Pasture4B3	BGAD4B3	2016	ROT	65	5	30	0	50	0
Pasture4B3	BGAD4B3	2016	ROT	100	0	0	0	70	0
Pasture4B3	BGAD4B3	2016	ROT	60	30	10	0	70	0
Pasture4B3	BGAD4B3	2016	ROT	90	0	10	0	70	0
Pasture4B3	BGAD4B3	2016	ROT	70	0	30	0	60	0
Pasture4B3	BGAD4B3	2016	ROT	65	15	20	0	50	0
Pasture4B3	BGAD4B3	2016	ROT	100	0	0	0	60	0
Pasture4B3	BGAD4B3	2016	ROT	85	0	10	5	40	0
Pasture4B3	BGAD4B3	2016	ROT	85	0	5	10	50	0
Pasture4B3	BGAD4B3	2016	ROT	75	5	20	0	60	0
Pasture4B3	BGAD4B3	2016	ROT	100	0	0	0	50	0
Pasture4B3	BGAD4B3	2016	ROT	60	0	20	20	40	0
Pasture4B3	BGAD4B3	2016	ROT	25	0	75	0	30	0
Pasture4B3	BGAD4B3	2016	ROT	50	30	10	20	20	0
Pasture4B3	BGAD4B3	2016	ROT	30	50	20	0	30	0
Pasture4B3	BGAD4B3	2016	ROT	50	50	0	0	60	0
Pasture4B3	BGAD4B3	2016	ROT	30	30	10	30	40	0
Pasture4B3	BGAD4B3	2016	ROT	70	10	0	20	60	0
Pasture4B3	BGAD4B3	2016	ROT	40	60	0	0	30	0
Pasture4B3	BGAD4B3	2016	ROT	80	10	10	0	60	0
Pasture4B3	BGAD4B3	2016	ROT	60	0	40	0	50	0
Pasture4B3	BGAD4B3	2016	ROT	70	0	30	0	40	0
Pasture4B3	BGAD4B3	2016	ROT	70	0	30	0	50	0
Pasture4B3	BGAD4B3	2016	ROT	80	0	20	0	50	0
Pasture4B3	BGAD4B3	2016	ROT	80	0	10	10	50	0
Pasture4B3	BGAD4B3	2016	ROT	70	20	10	0	50	0
Pasture4B3	BGAD4B3	2016	ROT	20	20	80	0	60	0
Pasture4B3	BGAD4B3	2016	ROT	50	0	30	20	50	0
Pasture4B3	BGAD4B3	2016	ROT	100	0	0	0	80	0
Pasture4B3	BGAD4B3	2016	ROT	15	5	80	0	40	0
Pasture4B3	BGAD4B3	2016	ROT	60	10	30	0	50	0
Pasture3B3	BGAD3B3	2016	PBG	50	0	50	0	40	0
Pasture3B3	BGAD3B3	2016	PBG	55	5	40	0	50	0
Pasture3B3	BGAD3B3	2016	PBG	40	10	40	10	40	0
Pasture3B3	BGAD3B3	2016	PBG	70	10	20	0	50	0
Pasture3B3	BGAD3B3	2016	PBG	40	10	40	10	30	0
Pasture3B3	BGAD3B3	2016	PBG	50	10	40	0	40	0
Pasture3B3	BGAD3B3	2016	PBG	65	5	30	0	20	0
Pasture3B3	BGAD3B3	2016	PBG	70	0	20	10	30	0
Pasture3B3	BGAD3B3	2016	PBG	20	50	0	30	40	0
Pasture3B3	BGAD3B3	2016	PBG	40	10	40	10	40	0
Pasture3B3	BGAD3B3	2016	PBG	40	10	10	40	20	0
Pasture3B3	BGAD3B3	2016	PBG	60	10	10	20	40	0
Pasture3B3	BGAD3B3	2016	PBG	60	0	40	0	40	0
Pasture3B3	BGAD3B3	2016	PBG	70	0	20	10	30	0
Pasture3B3	BGAD3B3	2016	PBG	90	0	10	0	50	0
Pasture3B3	BGAD3B3	2016	PBG	85	10	5	0	70	0
Pasture3B3	BGAD3B3	2016	PBG	75	25	0	0	50	0
Pasture3B3	BGAD3B3	2016	PBG	100	0	0	0	60	0
Pasture3B3	BGAD3B3	2016	PBG	60	10	30	0	30	0
Pasture3B3	BGAD3B3	2016	PBG	100	0	0	0	50	0
Pasture3B3	BGAD3B3	2016	PBG	100	0	0	0	70	0
Pasture3B3	BGAD3B3	2016	PBG	70	0	30	0	60	0
Pasture3B3	BGAD3B3	2016	PBG	70	0	30	0	80	0
Pasture3B3	BGAD3B3	2016	PBG	100	0	0	0	70	0
Pasture3B3	BGAD3B3	2016	PBG	85	15	0	0	100	0
Pasture3B3	BGAD3B3	2016	PBG	90	10	0	0	120	0
Pasture3B3	BGAD3B3	2016	PBG	0	0	0	100	0	0
Pasture3B3	BGAD3B3	2016	PBG	90	10	0	0	80	0
Pasture3B3	BGAD3B3	2016	PBG	90	0	10	0	110	0
Pasture3B3	BGAD3B3	2016	PBG	10	80	10	0	70	0
Pasture3B3	BGAD3B3	2016	PBG	30	5	60	5	40	0
Pasture3B3	BGAD3B3	2016	PBG	50	25	25	0	50	0
Pasture3B3	BGAD3B3	2016	PBG	40	30	30	0	40	0
Pasture3B3	BGAD3B3	2016	PBG	80	10	10	0	90	0
Pasture3B3	BGAD3B3	2016	PBG	70	30	0	0	80	0
Pasture3B3	BGAD3B3	2016	PBG	70	20	10	0	60	0
Pasture6B3	BGAD6B3	2016	PBG	5	55	40	0	40	0
Pasture6B3	BGAD6B3	2016	PBG	10	10	80	0	10	0
Pasture6B3	BGAD6B3	2016	PBG	80	10	0	10	30	0
Pasture6B3	BGAD6B3	2016	PBG	0	80	20	0	60	0
Pasture6B3	BGAD6B3	2016	PBG	30	60	10	0	40	0
Pasture6B3	BGAD6B3	2016	PBG	30	40	30	0	50	0
Pasture6B3	BGAD6B3	2016	PBG	70	0	30	0	40	0
Pasture6B3	BGAD6B3	2016	PBG	80	0	20	0	30	0
Pasture6B3	BGAD6B3	2016	PBG	65	15	20	0	30	0
Pasture6B3	BGAD6B3	2016	PBG	40	50	10	0	60	0
Pasture6B3	BGAD6B3	2016	PBG	0	70	30	0	40	0
Pasture6B3	BGAD6B3	2016	PBG	20	80	0	0	60	0
Pasture6B3	BGAD6B3	2016	PBG	80	0	10	10	60	0
Pasture6B3	BGAD6B3	2016	PBG	40	0	10	50	70	0
Pasture6B3	BGAD6B3	2016	PBG	80	0	10	10	60	0
Pasture6B3	BGAD6B3	2016	PBG	80	0	20	0	50	0
Pasture6B3	BGAD6B3	2016	PBG	70	10	10	10	20	0
Pasture6B3	BGAD6B3	2016	PBG	25	5	30	40	30	0
Pasture6B3	BGAD6B3	2016	PBG	55	0	30	15	50	0
Pasture6B3	BGAD6B3	2016	PBG	75	0	0	25	50	0
Pasture6B3	BGAD6B3	2016	PBG	90	0	10	0	40	0
Pasture6B3	BGAD6B3	2016	PBG	90	0	0	10	10	0
Pasture6B3	BGAD6B3	2016	PBG	65	5	10	20	50	0
Pasture6B3	BGAD6B3	2016	PBG	80	0	20	0	40	0
Pasture6B3	BGAD6B3	2016	PBG	50	0	0	50	20	0
Pasture6B3	BGAD6B3	2016	PBG	40	10	50	0	30	0
Pasture6B3	BGAD6B3	2016	PBG	25	5	70	0	30	0
Pasture6B3	BGAD6B3	2016	PBG	20	0	60	20	20	0
Pasture6B3	BGAD6B3	2016	PBG	25	0	75	0	30	0
Pasture6B3	BGAD6B3	2016	PBG	70	0	20	10	30	0
Pasture3B3	QUICK3B3	2016	RG	5	5	85	5	2	0
Pasture3B3	QUICK3B3	2016	RG	15	5	75	5	4	0
Pasture3B3	QUICK3B3	2016	RG	10	5	10	75	0	0
Pasture3B3	QUICK3B3	2016	RG	15	0	5	80	14	0
Pasture3B3	QUICK3B3	2016	RG	10	0	90	0	6	0
Pasture3B3	QUICK3B3	2016	RG	25	0	65	10	9	0
Pasture3B3	QUICK3B3	2016	RG	15	0	80	5	13	0
Pasture3B3	QUICK3B3	2016	RG	5	5	90	0	8	0
Pasture3B3	QUICK3B3	2016	RG	20	0	75	5	21	0
Pasture3B3	QUICK3B3	2016	RG	10	5	70	15	18	0
Pasture3B3	QUICK3B3	2016	RG	5	0	5	90	0	0
Pasture3B3	QUICK3B3	2016	RG	20	0	5	75	5	0
Pasture3B3	QUICK3B3	2016	RG	20	0	80	0	2	0
Pasture3B3	QUICK3B3	2016	RG	25	5	60	10	4	0
Pasture3B3	QUICK3B3	2016	RG	45	5	35	15	4	0
Pasture3B3	QUICK3B3	2016	RG	20	5	70	5	4	0
Pasture3B3	QUICK3B3	2016	RG	10	5	70	15	8	0
Pasture3B3	QUICK3B3	2016	RG	25	0	70	5	12	0
Pasture3B3	QUICK3B3	2016	RG	10	0	10	80	0	0
Pasture3B3	QUICK3B3	2016	RG	10	5	5	80	6	0
Pasture3B3	QUICK3B3	2016	RG	5	5	0	90	4	0
Pasture3B3	QUICK3B3	2016	RG	20	0	10	70	9	0
Pasture3B3	QUICK3B3	2016	RG	20	5	5	70	9	0
Pasture3B3	QUICK3B3	2016	RG	10	5	80	5	6	0
Pasture3B3	QUICK3B3	2016	RG	15	5	55	25	1	0
Pasture3B3	QUICK3B3	2016	RG	5	0	60	35	2	0
Pasture3B3	QUICK3B3	2016	RG	0	5	35	60	7	0
Pasture3B3	QUICK3B3	2016	RG	5	5	25	65	14	0
Pasture3B3	QUICK3B3	2016	RG	5	5	15	75	0	0
Pasture3B3	QUICK3B3	2016	RG	5	80	15	80	3	0
Pasture1B3	QUICK1B3	2016	PBG	15	0	85	0	6	0
Pasture1B3	QUICK1B3	2016	PBG	20	5	70	5	8	0
Pasture1B3	QUICK1B3	2016	PBG	5	15	75	5	8	0
Pasture1B3	QUICK1B3	2016	PBG	50	5	40	5	18	0
Pasture1B3	QUICK1B3	2016	PBG	15	5	60	20	6	0
Pasture1B3	QUICK1B3	2016	PBG	20	5	70	5	3	0
Pasture1B3	QUICK1B3	2016	PBG	20	0	5	75	11	0
Pasture1B3	QUICK1B3	2016	PBG	20	0	10	70	11	0
Pasture1B3	QUICK1B3	2016	PBG	15	0	0	85	8	0
Pasture1B3	QUICK1B3	2016	PBG	10	5	0	85	5	0
Pasture1B3	QUICK1B3	2016	PBG	15	5	5	75	0	0
Pasture1B3	QUICK1B3	2016	PBG	15	5	5	75	9	0
Pasture1B3	QUICK1B3	2016	PBG	15	5	50	30	2	0
Pasture1B3	QUICK1B3	2016	PBG	15	5	50	30	2	0
Pasture1B3	QUICK1B3	2016	PBG	25	5	50	20	6	0
Pasture1B3	QUICK1B3	2016	PBG	5	5	5	85	0	0
Pasture1B3	QUICK1B3	2016	PBG	20	5	35	40	8	0
Pasture1B3	QUICK1B3	2016	PBG	30	0	20	50	6	0
Pasture1B3	QUICK1B3	2016	PBG	5	5	0	90	0	0
Pasture1B3	QUICK1B3	2016	PBG	75	5	15	5	12	0
Pasture1B3	QUICK1B3	2016	PBG	15	10	15	60	3	0
Pasture1B3	QUICK1B3	2016	PBG	10	15	10	65	1	0
Pasture1B3	QUICK1B3	2016	PBG	25	5	55	15	5	0
Pasture1B3	QUICK1B3	2016	PBG	15	0	20	65	5	0
Pasture4B3	QUICK4B3	2016	RG	25	5	60	10	5	0
Pasture4B3	QUICK4B3	2016	RG	25	5	70	0	18	0
Pasture4B3	QUICK4B3	2016	RG	20	5	75	0	13	0
Pasture4B3	QUICK4B3	2016	RG	75	5	75	5	10	0
Pasture4B3	QUICK4B3	2016	RG	25	0	75	0	15	0
Pasture4B3	QUICK4B3	2016	RG	10	5	80	5	10	0
Pasture4B3	QUICK4B3	2016	RG	5	20	75	0	12	0
Pasture4B3	QUICK4B3	2016	RG	55	5	30	5	15	0
Pasture4B3	QUICK4B3	2016	RG	30	5	65	0	11	0
Pasture4B3	QUICK4B3	2016	RG	25	5	55	15	15	0
Pasture4B3	QUICK4B3	2016	RG	10	5	85	0	12	0
Pasture4B3	QUICK4B3	2016	RG	15	5	65	15	11	0
Pasture4B3	QUICK4B3	2016	RG	20	0	80	0	1	0
Pasture4B3	QUICK4B3	2016	RG	35	5	60	0	16	0
Pasture4B3	QUICK4B3	2016	RG	25	0	75	0	1	0
Pasture4B3	QUICK4B3	2016	RG	10	5	85	0	12	0
Pasture4B3	QUICK4B3	2016	RG	30	0	70	0	16	0
Pasture4B3	QUICK4B3	2016	RG	10	10	80	0	2	0
Pasture4B3	QUICK4B3	2016	RG	5	5	5	85	0	0
Pasture4B3	QUICK4B3	2016	RG	5	5	50	40	10	0
Pasture4B3	QUICK4B3	2016	RG	5	5	10	80	2	0
Pasture4B3	QUICK4B3	2016	RG	10	5	45	40	6	0
Pasture4B3	QUICK4B3	2016	RG	5	5	45	45	3	0
Pasture4B3	QUICK4B3	2016	RG	5	5	5	85	1	0
Pasture4B3	QUICK4B3	2016	RG	15	0	80	5	6	0
Pasture4B3	QUICK4B3	2016	RG	70	0	30	0	7	0
Pasture4B3	QUICK4B3	2016	RG	35	5	55	5	10	0
Pasture4B3	QUICK4B3	2016	RG	15	0	85	0	8	0
Pasture4B3	QUICK4B3	2016	RG	20	0	80	0	10	0
Pasture4B3	QUICK4B3	2016	RG	20	5	80	0	4	0

## Sheet: RWBL2014
ID	Pasture	Year	use	TRT	Grass	Forb	Lit	BG	SubHgt
/*RWBL0402(2014_bgad*/	BGAD4A1	2014	1	CON	92.5	2.5	0	0	130
/*RWBL0403*/	BGAD4A1	2014	1	CON	76.25	20	0	0	100
/*RWBL0404*/	BGAD4A1	2014	1	CON	91.25	8.75	0	0	200
/*RWBL0405*/	BGAD4A1	2014	1	CON	68.75	31.25	0	0	100
/*RWBL0406*/	BGAD4A1	2014	1	CON	60	36.25	0	0	130
/*RWBL0407*/	BGAD4B1	2014	1	CON	50	50	0	0	80
/*RWBL0408*/	BGAD4B1	2014	1	CON	20	57	0	0	144
/*RWBL0409*/	BGAD4B1	2014	1	CON	86	14	0	0	100
/*RWBL01(2014_Drec)*/	DREC1B1	2014	1	CON	91.25	3.75	3.75	1.25	105
/*RWBL02*/	DREC1B1	2014	1	CON	30	67.5	0	2.5	160
/*RWBL03*/	DREC5B1	2014	1	CON	97.5	0	2.5	0	150
/*RWBL04*/	DREC1B1	2014	1	CON	78.75	18.75	0	2.5	135
/*RWBL05*/	DREC1C1	2014	1	CON	98.75	1.25	0	0	200
/*RWBL06*/	DREC1C1	2014	1	CON	77.5	22.5	0	0	180
/*RWBL07*/	DREC1C1	2014	1	CON	21.25	78.75	0	0	180
/*RWBL08*/	DREC1C1	2014	1	CON	95	0	5	0	220
/*RWBL09*/	DREC1C1	2014	1	CON	37.5	62.5	0	0	160
/*RWBL10*/	DREC1C1	2014	1	CON	75	16.25	8.75	0	210
Pasture4A1	BGAD4A1	2014	0	PBG	95	5	0	0	55
Pasture4A1	BGAD4A1	2014	0	PBG	95	5	0	0	90
Pasture4A1	BGAD4A1	2014	0	PBG	100	0	0	0	65
Pasture4A1	BGAD4A1	2014	0	PBG	95	5	0	0	60
Pasture4A1	BGAD4A1	2014	0	PBG	100	0	0	0	80
Pasture4A1	BGAD4A1	2014	0	PBG	70	30	0	0	60
Pasture4A1	BGAD4A1	2014	0	PBG	100	0	0	0	37
Pasture4A1	BGAD4A1	2014	0	PBG	95	5	0	0	45
Pasture4A1	BGAD4A1	2014	0	PBG	95	5	0	0	80
Pasture4A1	BGAD4A1	2014	0	PBG	95	5	0	0	50
Pasture4A1	BGAD4A1	2014	0	PBG	95	5	0	0	60
Pasture4A1	BGAD4A1	2014	0	PBG	95	5	0	0	55
Pasture4A1	BGAD4A1	2014	0	PBG	85	15	0	0	32
Pasture4A1	BGAD4A1	2014	0	PBG	100	0	0	0	30
Pasture4A1	BGAD4A1	2014	0	PBG	85	15	0	0	20
Pasture4A1	BGAD4A1	2014	0	PBG	90	10	0	0	45
Pasture4A1	BGAD4A1	2014	0	PBG	70	30	0	0	45
Pasture4A1	BGAD4A1	2014	0	PBG	100	0	0	0	35
Pasture4A1	BGAD4A1	2014	0	PBG	95	5	0	0	35
Pasture4A1	BGAD4A1	2014	0	PBG	90	5	0	0	55
Pasture4A1	BGAD4A1	2014	0	PBG	85	15	0	0	50
Pasture4A1	BGAD4A1	2014	0	PBG	95	5	0	0	35
Pasture4A1	BGAD4A1	2014	0	PBG	75	0	25	0	82
Pasture4A1	BGAD4A1	2014	0	PBG	40	10	50	0	40
Pasture4A1	BGAD4A1	2014	0	PBG	75	25	0	0	105
Pasture4A1	BGAD4A1	2014	0	PBG	100	0	0	0	107
Pasture4A1	BGAD4A1	2014	0	PBG	95	5	0	0	110
Pasture4A1	BGAD4A1	2014	0	PBG	75	25	0	0	100
Pasture4A1	BGAD4A1	2014	0	PBG	75	25	0	0	100
Pasture4A1	BGAD4A1	2014	0	PBG	100	0	0	0	45
Pasture4A1	BGAD4A1	2014	0	PBG	85	15	0	0	80
Pasture4A1	BGAD4A1	2014	0	PBG	85	10	0	0	60
Pasture4A1	BGAD4A1	2014	0	PBG	100	0	0	0	105
Pasture4A1	BGAD4A1	2014	0	PBG	100	0	0	0	100
Pasture4A1	BGAD4A1	2014	0	PBG	85	5	0	0	50
Pasture4A1	BGAD4A1	2014	0	PBG	95	5	0	0	105
Pasture4A1	BGAD4A1	2014	0	PBG	95	5	0	0	60
Pasture4A1	BGAD4A1	2014	0	PBG	55	40	0	0	80
Pasture4A1	BGAD4A1	2014	0	PBG	95	5	0	0	70
Pasture4A1	BGAD4A1	2014	0	PBG	100	0	0	0	55
Pasture4A1	BGAD4A1	2014	0	PBG	100	0	0	0	60
Pasture4A1	BGAD4A1	2014	0	PBG	100	0	0	0	85
Pasture4B1	BGAD4B1	2014	0	PBG	65	35	0	0	79
Pasture4B1	BGAD4B1	2014	0	PBG	80	20	0	0	94
Pasture4B1	BGAD4B1	2014	0	PBG	75	25	0	0	41
Pasture4B1	BGAD4B1	2014	0	PBG	90	10	0	0	80
Pasture4B1	BGAD4B1	2014	0	PBG	30	70	0	0	81
Pasture4B1	BGAD4B1	2014	0	PBG	90	10	0	0	26
Pasture4B1	BGAD4B1	2014	0	PBG	95	5	0	0	54
Pasture4B1	BGAD4B1	2014	0	PBG	85	15	0	0	70
Pasture4B1	BGAD4B1	2014	0	PBG	100	0	0	0	73
Pasture4B1	BGAD4B1	2014	0	PBG	95	5	0	0	82
Pasture4B1	BGAD4B1	2014	0	PBG	90	10	0	0	65
Pasture4B1	BGAD4B1	2014	0	PBG	90	10	0	0	96
Pasture4B1	BGAD4B1	2014	0	PBG	95	5	0	0	96
Pasture4B1	BGAD4B1	2014	0	PBG	70	30	0	0	71
Pasture4B1	BGAD4B1	2014	0	PBG	90	10	0	0	62
Pasture4B1	BGAD4B1	2014	0	PBG	90	10	0	0	77
Pasture4B1	BGAD4B1	2014	0	PBG	95	5	0	0	70
Pasture4B1	BGAD4B1	2014	0	PBG	95	5	0	0	61
Pasture4B1	BGAD4B1	2014	0	PBG	80	20	0	0	66
Pasture4B1	BGAD4B1	2014	0	PBG	70	30	0	0	83
Pasture4B1	BGAD4B1	2014	0	PBG	40	60	0	0	112
Pasture4B1	BGAD4B1	2014	0	PBG	90	10	0	0	26
Pasture4B1	BGAD4B1	2014	0	PBG	55	45	0	0	94
Pasture4B1	BGAD4B1	2014	0	PBG	95	5	0	0	104
Pasture4B1	BGAD4B1	2014	0	PBG	45	55	0	0	87
Pasture4B1	BGAD4B1	2014	0	PBG	95	5	0	0	63
Pasture4B1	BGAD4B1	2014	0	PBG	75	25	0	0	35
Pasture4B1	BGAD4B1	2014	0	PBG	80	20	0	0	106
Pasture4B1	BGAD4B1	2014	0	PBG	85	15	0	0	88
Pasture4B1	BGAD4B1	2014	0	PBG	75	25	0	0	132
Pasture4B1	BGAD4B1	2014	0	PBG	70	30	0	0	86
Pasture4B1	BGAD4B1	2014	0	PBG	55	45	0	0	120
Pasture4B1	BGAD4B1	2014	0	PBG	90	10	0	0	98
Pasture4B1	BGAD4B1	2014	0	PBG	85	15	0	0	62
Pasture4B1	BGAD4B1	2014	0	PBG	75	25	0	0	98
Pasture4B1	BGAD4B1	2014	0	PBG	80	20	0	0	70
Pasture4B1	BGAD4B1	2014	0	PBG	95	5	0	0	66
Pasture4B1	BGAD4B1	2014	0	PBG	95	5	0	0	87
Pasture4B1	BGAD4B1	2014	0	PBG	100	0	0	0	99
Pasture4B1	BGAD4B1	2014	0	PBG	90	10	0	0	77
Pasture4B1	BGAD4B1	2014	0	PBG	95	5	0	0	121
Pasture4B1	BGAD4B1	2014	0	PBG	95	5	0	0	86
Pasture1C1	DREC1C1	2014	0	PBG	50	0	0	50	70
Pasture1C1	DREC1C1	2014	0	PBG	5	95	0	0	140
Pasture1C1	DREC1C1	2014	0	PBG	100	0	0	0	115
Pasture1C1	DREC1C1	2014	0	PBG	25	75	0	0	145
Pasture1C1	DREC1C1	2014	0	PBG	100	0	0	0	100
Pasture1C1	DREC1C1	2014	0	PBG	100	0	0	0	125
Pasture1C1	DREC1C1	2014	0	PBG	60	0	30	10	35
Pasture1C1	DREC1C1	2014	0	PBG	35	0	60	5	80
Pasture1C1	DREC1C1	2014	0	PBG	45	0	50	5	70
Pasture1C1	DREC1C1	2014	0	PBG	15	0	65	20	100
Pasture1C1	DREC1C1	2014	0	PBG	15	5	80	0	225
Pasture1C1	DREC1C1	2014	0	PBG	20	0	5	75	80
Pasture1C1	DREC1C1	2014	0	PBG	30	5	65	0	10
Pasture1C1	DREC1C1	2014	0	PBG	25	0	65	10	70
Pasture1C1	DREC1C1	2014	0	PBG	45	0	55	0	80
Pasture1C1	DREC1C1	2014	0	PBG	65	0	35	0	80
Pasture1C1	DREC1C1	2014	0	PBG	80	0	20	0	90
Pasture1C1	DREC1C1	2014	0	PBG	60	0	40	0	90
Pasture1C1	DREC1C1	2014	0	PBG	10	40	25	15	70
Pasture1C1	DREC1C1	2014	0	PBG	20	0	80	0	40
Pasture1C1	DREC1C1	2014	0	PBG	50	0	25	25	115
Pasture1C1	DREC1C1	2014	0	PBG	100	0	0	0	150
Pasture1C1	DREC1C1	2014	0	PBG	100	0	0	0	155
Pasture1C1	DREC1C1	2014	0	PBG	100	0	0	0	150
Pasture1B1	DREC1B1	2014	0	PBG	35	0	10	55	55
Pasture1B1	DREC1B1	2014	0	PBG	5	20	5	70	55
Pasture1B1	DREC1B1	2014	0	PBG	35	5	5	55	85
Pasture1B1	DREC1B1	2014	0	PBG	30	5	65	0	65
Pasture1B1	DREC1B1	2014	0	PBG	5	0	95	0	40
Pasture1B1	DREC1B1	2014	0	PBG	90	0	5	5	65
Pasture1B1	DREC1B1	2014	0	PBG	10	0	85	5	30
Pasture1B1	DREC1B1	2014	0	PBG	10	0	40	50	180
Pasture1B1	DREC1B1	2014	0	PBG	40	0	50	10	65
Pasture1B1	DREC1B1	2014	0	PBG	100	0	0	0	100
Pasture1B1	DREC1B1	2014	0	PBG	85	0	15	0	85
Pasture1B1	DREC1B1	2014	0	PBG	50	0	30	20	100
Pasture1B1	DREC1B1	2014	0	PBG	90	0	5	5	50
Pasture1B1	DREC1B1	2014	0	PBG	0	5	95	0	50
Pasture1B1	DREC1B1	2014	0	PBG	0	25	70	5	30
Pasture1B1	DREC1B1	2014	0	PBG	80	10	0	10	35
Pasture1B1	DREC1B1	2014	0	PBG	0	15	10	75	15
Pasture1B1	DREC1B1	2014	0	PBG	10	0	5	85	0
Pasture1B1	DREC1B1	2014	0	PBG	5	5	75	15	35
Pasture1B1	DREC1B1	2014	0	PBG	100	0	0	0	135
Pasture1B1	DREC1B1	2014	0	PBG	100	0	0	0	110
Pasture1B1	DREC1B1	2014	0	PBG	90	5	5	0	95
Pasture1B1	DREC1B1	2014	0	PBG	50	0	25	25	55
Pasture1B1	DREC1B1	2014	0	PBG	100	0	0	0	80
Pasture5B1	DREC5B1	2014	0	PBG	0	15	5	80	60
Pasture5B1	DREC5B1	2014	0	PBG	40	20	10	30	65
Pasture5B1	DREC5B1	2014	0	PBG	90	5	0	0	60
Pasture5B1	DREC5B1	2014	0	PBG	100	0	0	0	85
Pasture5B1	DREC5B1	2014	0	PBG	95	5	0	0	80
Pasture5B1	DREC5B1	2014	0	PBG	80	5	15	0	70
Pasture5B1	DREC5B1	2014	0	PBG	65	0	10	25	55
Pasture5B1	DREC5B1	2014	0	PBG	50	5	15	30	65
Pasture5B1	DREC5B1	2014	0	PBG	60	15	5	20	60
Pasture5B1	DREC5B1	2014	0	PBG	15	0	5	80	30
Pasture5B1	DREC5B1	2014	0	PBG	100	0	0	0	80
Pasture5B1	DREC5B1	2014	0	PBG	90	0	0	10	65
Pasture5B1	DREC5B1	2014	0	PBG	5	15	70	10	25
Pasture5B1	DREC5B1	2014	0	PBG	100	0	0	0	80
Pasture5B1	DREC5B1	2014	0	PBG	50	0	50	0	60
Pasture5B1	DREC5B1	2014	0	PBG	20	30	45	5	35
Pasture5B1	DREC5B1	2014	0	PBG	95	0	0	5	80
Pasture5B1	DREC5B1	2014	0	PBG	70	5	20	5	70
Pasture5B1	DREC5B1	2014	0	PBG	85	5	10	0	50
Pasture5B1	DREC5B1	2014	0	PBG	95	5	0	0	65
Pasture5B1	DREC5B1	2014	0	PBG	90	0	10	0	90
Pasture5B1	DREC5B1	2014	0	PBG	85	5	5	5	70
Pasture5B1	DREC5B1	2014	0	PBG	90	0	10	0	70
Pasture5B1	DREC5B1	2014	0	PBG	90	5	0	5	85
Pasture5B1	DREC5B1	2014	0	PBG	0	0	0	100	0
Pasture5B1	DREC5B1	2014	0	PBG	80	0	20	0	80
Pasture5B1	DREC5B1	2014	0	PBG	100	0	0	0	90
Pasture5B1	DREC5B1	2014	0	PBG	90	0	10	0	90
Pasture5B1	DREC5B1	2014	0	PBG	80	0	20	0	70
Pasture5B1	DREC5B1	2014	0	PBG	70	0	30	0	70

## Sheet: RWBL2015
ID	Pasture	Year	use	TRT	Grass	Forb	Lit	BG	SubHgt
/*RWBL02(2015_Bgad*/	BGAD4A2	2015	1	ROT	15	78.75	6.25	0	60
/*RWBL03*/	BGAD4A2	2015	1	ROT	0	30	0	70	70
/*RWBL04*/	BGAD5B2	2015	1	ROT	32.5	50	12.5	0	120
/*RWBL05*/	BGAD4B2	2015	1	ROT	78.75	0	21.25	0	80
/*RWBL01(2015_QUICK)*/	QUICK2A2	2015	1	ROT	10	5	0	0	200
/*RWBL02*/	QUICK2A2	2015	1	ROT	17.5	2.5	12.5	0	230
/*RWBL03*/	QUICK2A2	2015	1	ROT	61.25	1.25	15	3.75	300
/*RWBL04*/	QUICK2B2	2015	1	PBG	21.25	5	11.25	0	245
/*RWBL05*/	QUICK2B2	2015	1	ROT	35	0	1.25	0	320
/*RWBL06*/	QUICK2B2	2015	1	ROT	11.25	1.25	3.75	0	250
Pasture4A2	BGAD4A2	2015	0	ROT	85	20	15	0	10
Pasture4A2	BGAD4A2	2015	0	ROT	10	0	90	0	30
Pasture4A2	BGAD4A2	2015	0	ROT	75	10	15	0	30
Pasture4A2	BGAD4A2	2015	0	ROT	25	0	70	0	10
Pasture4A2	BGAD4A2	2015	0	ROT	50	0	50	0	0
Pasture4A2	BGAD4A2	2015	0	ROT	35	25	30	0	20
Pasture4A2	BGAD4A2	2015	0	ROT	0	0	95	5	0
Pasture4A2	BGAD4A2	2015	0	ROT	50	45	0	5	30
Pasture4A2	BGAD4A2	2015	0	ROT	5	25	20	0	30
Pasture4A2	BGAD4A2	2015	0	ROT	10	30	60	0	50
Pasture4A2	BGAD4A2	2015	0	ROT	0	65	35	0	10
Pasture4A2	BGAD4A2	2015	0	ROT	25	15	60	0	40
Pasture4A2	BGAD4A2	2015	0	ROT	30	0	70	0	20
Pasture4A2	BGAD4A2	2015	0	ROT	90	5	5	0	30
Pasture4A2	BGAD4A2	2015	0	ROT	55	45	0	0	30
Pasture4A2	BGAD4A2	2015	0	ROT	15	80	5	0	40
Pasture4A2	BGAD4A2	2015	0	ROT	100	0	0	0	50
Pasture4A2	BGAD4A2	2015	0	ROT	30	30	40	0	20
Pasture4A2	BGAD4A2	2015	0	ROT	0	25	75	0	0
Pasture4A2	BGAD4A2	2015	0	ROT	35	20	35	0	20
Pasture4A2	BGAD4A2	2015	0	ROT	20	50	30	0	20
Pasture4A2	BGAD4A2	2015	0	ROT	40	50	10	0	30
Pasture4A2	BGAD4A2	2015	0	ROT	15	5	80	0	40
Pasture4A2	BGAD4A2	2015	0	ROT	70	0	30	0	30
Pasture4A2	BGAD4A2	2015	0	ROT	100	0	0	0	90
Pasture4A2	BGAD4A2	2015	0	ROT	55	40	5	0	30
Pasture4A2	BGAD4A2	2015	0	ROT	10	30	60	0	40
Pasture4A2	BGAD4A2	2015	0	ROT	80	0	20	0	50
Pasture4A2	BGAD4A2	2015	0	ROT	15	5	80	0	60
Pasture4A2	BGAD4A2	2015	0	ROT	70	0	30	0	30
Pasture4A2	BGAD4A2	2015	0	ROT	60	20	15	5	30
Pasture4A2	BGAD4A2	2015	0	ROT	65	20	15	0	20
Pasture4A2	BGAD4A2	2015	0	ROT	60	10	30	0	50
Pasture4A2	BGAD4A2	2015	0	ROT	50	0	50	0	50
Pasture4A2	BGAD4A2	2015	0	ROT	60	40	0	0	30
Pasture4A2	BGAD4A2	2015	0	ROT	25	15	60	0	100
Pasture5B2	BGAD5B2	2015	0	ROT	20	15	65	0	40
Pasture5B2	BGAD5B2	2015	0	ROT	20	20	60	0	40
Pasture5B2	BGAD5B2	2015	0	ROT	50	40	10	0	30
Pasture5B2	BGAD5B2	2015	0	ROT	65	20	15	0	40
Pasture5B2	BGAD5B2	2015	0	ROT	75	5	20	0	40
Pasture5B2	BGAD5B2	2015	0	ROT	50	25	25	0	30
Pasture5B2	BGAD5B2	2015	0	ROT	5	0	95	0	20
Pasture5B2	BGAD5B2	2015	0	ROT	15	0	85	0	10
Pasture5B2	BGAD5B2	2015	0	ROT	20	20	60	0	40
Pasture5B2	BGAD5B2	2015	0	ROT	30	0	50	0	30
Pasture5B2	BGAD5B2	2015	0	ROT	25	25	50	0	40
Pasture5B2	BGAD5B2	2015	0	ROT	25	10	65	0	30
Pasture5B2	BGAD5B2	2015	0	ROT	75	20	15	0	50
Pasture5B2	BGAD5B2	2015	0	ROT	30	30	40	0	20
Pasture5B2	BGAD5B2	2015	0	ROT	55	15	40	0	30
Pasture5B2	BGAD5B2	2015	0	ROT	25	15	60	0	20
Pasture5B2	BGAD5B2	2015	0	ROT	20	0	80	0	10
Pasture5B2	BGAD5B2	2015	0	ROT	25	45	30	0	10
Pasture5B2	BGAD5B2	2015	0	ROT	0	0	100	0	0
Pasture5B2	BGAD5B2	2015	0	ROT	5	5	90	0	10
Pasture5B2	BGAD5B2	2015	0	ROT	60	30	10	0	30
Pasture5B2	BGAD5B2	2015	0	ROT	40	20	40	0	20
Pasture5B2	BGAD5B2	2015	0	ROT	20	30	50	0	30
Pasture5B2	BGAD5B2	2015	0	ROT	40	20	40	0	20
Pasture4B2	BGAD4B2	2015	0	ROT	10	5	85	0	0
Pasture4B2	BGAD4B2	2015	0	ROT	65	20	0	0	50
Pasture4B2	BGAD4B2	2015	0	ROT	10	0	30	0	20
Pasture4B2	BGAD4B2	2015	0	ROT	20	80	0	0	30
Pasture4B2	BGAD4B2	2015	0	ROT	10	20	70	0	30
Pasture4B2	BGAD4B2	2015	0	ROT	0	90	10	0	80
Pasture4B2	BGAD4B2	2015	0	ROT	40	50	10	0	30
Pasture4B2	BGAD4B2	2015	0	ROT	50	10	40	0	20
Pasture4B2	BGAD4B2	2015	0	ROT	35	45	10	0	30
Pasture4B2	BGAD4B2	2015	0	ROT	35	45	10	0	30
Pasture4B2	BGAD4B2	2015	0	ROT	85	5	15	0	10
Pasture4B2	BGAD4B2	2015	0	ROT	45	15	40	0	20
Pasture4B2	BGAD4B2	2015	0	ROT	15	5	85	0	0
Pasture4B2	BGAD4B2	2015	0	ROT	60	10	30	0	10
Pasture4B2	BGAD4B2	2015	0	ROT	60	0	30	0	10
Pasture4B2	BGAD4B2	2015	0	ROT	20	20	60	0	60
Pasture4B2	BGAD4B2	2015	0	ROT	75	5	20	0	20
Pasture4B2	BGAD4B2	2015	0	ROT	25	15	60	0	10
Pasture4B2	BGAD4B2	2015	0	ROT	10	75	15	0	50
Pasture4B2	BGAD4B2	2015	0	ROT	0	50	50	0	60
Pasture4B2	BGAD4B2	2015	0	ROT	15	10	0	75	0
Pasture4B2	BGAD4B2	2015	0	ROT	5	5	90	0	0
Pasture4B2	BGAD4B2	2015	0	ROT	70	0	30	0	0
Pasture4B2	BGAD4B2	2015	0	ROT	90	5	5	0	20
Pasture4B2	BGAD4B2	2015	0	ROT	55	30	15	0	20
Pasture4B2	BGAD4B2	2015	0	ROT	60	25	15	0	40
Pasture4B2	BGAD4B2	2015	0	ROT	75	5	20	0	10
Pasture4B2	BGAD4B2	2015	0	ROT	30	40	30	0	60
Pasture4B2	BGAD4B2	2015	0	ROT	0	40	40	20	20
Pasture4B2	BGAD4B2	2015	0	ROT	20	50	15	15	30
Pasture4B2	BGAD4B2	2015	0	ROT	40	40	0	20	10
Pasture4B2	BGAD4B2	2015	0	ROT	50	50	0	0	40
Pasture4B2	BGAD4B2	2015	0	ROT	30	50	20	0	50
Pasture4B2	BGAD4B2	2015	0	ROT	10	70	20	0	40
Pasture4B2	BGAD4B2	2015	0	ROT	0	60	40	0	30
Pasture4B2	BGAD4B2	2015	0	ROT	30	30	40	0	30
			0
			0
Entry	PastureNumber	Year	0	FieldType	Grass (%)	Forb (%)	Litter (%)	Bare (%)	VegHeight (cm)
Pasture2A2	QUICK2A2	2015	0	RG	20	0	80	0	18
Pasture2A2	QUICK2A2	2015	0	RG	25	0	65	10	13
Pasture2A2	QUICK2A2	2015	0	RG	15	0	85	0	7
Pasture2A2	QUICK2A2	2015	0	RG	40	5	55	0	9
Pasture2A2	QUICK2A2	2015	0	RG	10	5	85	0	8
Pasture2A2	QUICK2A2	2015	0	RG	10	0	90	0	4
Pasture2A2	QUICK2A2	2015	0	RG	0	0	5	95	0
Pasture2A2	QUICK2A2	2015	0	RG	0	0	0	100	0
Pasture2A2	QUICK2A2	2015	0	RG	5	0	0	95	0
Pasture2A2	QUICK2A2	2015	0	RG	5	0	5	90	0
Pasture2A2	QUICK2A2	2015	0	RG	10	0	55	35	13
Pasture2A2	QUICK2A2	2015	0	RG	15	0	85	0	17
Pasture2A2	QUICK2A2	2015	0	RG	5	5	90	0	0
Pasture2A2	QUICK2A2	2015	0	RG	45	0	20	35	10
Pasture2A2	QUICK2A2	2015	0	RG	20	30	50	0	11
Pasture2A2	QUICK2A2	2015	0	RG	15	25	60	0	19
Pasture2A2	QUICK2A2	2015	0	RG	30	25	45	0	9
Pasture2A2	QUICK2A2	2015	0	RG	15	0	80	5	0
Pasture2A2	QUICK2A2	2015	0	RG	65	5	30	0	9
Pasture2A2	QUICK2A2	2015	0	RG	50	10	40	0	46
Pasture2A2	QUICK2A2	2015	0	RG	45	40	10	5	31
Pasture2A2	QUICK2A2	2015	0	RG	5	0	10	85	34
Pasture2A2	QUICK2A2	2015	0	RG	70	0	30	0	41
Pasture2A2	QUICK2A2	2015	0	RG	45	45	10	0	45
Pasture2A2	QUICK2A2	2015	0	RG	15	5	80	0	18
Pasture2A2	QUICK2A2	2015	0	RG	30	30	10	0	44
Pasture2A2	QUICK2A2	2015	0	RG	45	10	45	0	34
Pasture2A2	QUICK2A2	2015	0	RG	10	45	45	0	19
Pasture2A2	QUICK2A2	2015	0	RG	35	15	50	0	36
Pasture2A2	QUICK2A2	2015	0	RG	55	25	20	0	38
Pasture2B2	QUICK2B2	2015	0	RG	45	0	55	0	12
Pasture2B2	QUICK2B2	2015	0	RG	5	0	95	0	15
Pasture2B2	QUICK2B2	2015	0	RG	45	5	50	0	10
Pasture2B2	QUICK2B2	2015	0	RG	25	0	75	0	17
Pasture2B2	QUICK2B2	2015	0	RG	65	0	35	0	9
Pasture2B2	QUICK2B2	2015	0	RG	40	0	60	0	19
Pasture2B2	QUICK2B2	2015	0	RG	20	0	80	0	11
Pasture2B2	QUICK2B2	2015	0	RG	30	0	70	0	0
Pasture2B2	QUICK2B2	2015	0	RG	15	0	85	0	10
Pasture2B2	QUICK2B2	2015	0	RG	45	0	55	0	12
Pasture2B2	QUICK2B2	2015	0	RG	40	0	60	0	0
Pasture2B2	QUICK2B2	2015	0	RG	10	0	85	5	8
Pasture2B2	QUICK2B2	2015	0	RG	45	0	55	0	4
Pasture2B2	QUICK2B2	2015	0	RG	30	0	50	20	16
Pasture2B2	QUICK2B2	2015	0	RG	50	0	50	0	20
Pasture2B2	QUICK2B2	2015	0	RG	65	0	35	0	9
Pasture2B2	QUICK2B2	2015	0	RG	90	0	10	0	21
Pasture2B2	QUICK2B2	2015	0	RG	90	0	10	0	31
Pasture2B2	QUICK2B2	2015	0	RG	65	0	35	0	15
Pasture2B2	QUICK2B2	2015	0	RG	60	0	40	0	28
Pasture2B2	QUICK2B2	2015	0	RG	60	0	30	10	28
Pasture2B2	QUICK2B2	2015	0	RG	30	0	70	0	17
Pasture2B2	QUICK2B2	2015	0	RG	40	5	55	0	28
Pasture2B2	QUICK2B2	2015	0	RG	45	0	50	5	8
Pasture2B2	QUICK2B2	2015	0	RG	90	0	10	0	20
Pasture2B2	QUICK2B2	2015	0	RG	5	0	95	0	0
Pasture2B2	QUICK2B2	2015	0	RG	40	10	50	0	15
Pasture2B2	QUICK2B2	2015	0	RG	80	10	10	0	35
Pasture2B2	QUICK2B2	2015	0	RG	60	0	40	0	22
Pasture2B2	QUICK2B2	2015	0	RG	50	0	50	0	10

## Sheet: RWBL2016
ID	Pasture	Year	use	TRT	Grass	Forb	Lit	BG	SubHgt
/*RWBL01(2016_bgad)*/	BGAD4A3	2016	1	ROT	0	25	0	0	130
/*RWBL02*/	BGAD4A3	2016	1	ROT	0	41.25	0	0	130
/*RWBL03*/	BGAD4A3	2016	1	ROT	0	35	0	0	130
/*RWBL04*/	BGAD4A3	2016	1	ROT	0	40	0	0	130
/*RWBL05*/	BGAD3A3	2016	1	PBG	0	51.25	0	0	210
Pasture3A3	BGAD3A3	2016	0	PBG	55	10	20	5	10
Pasture3A3	BGAD3A3	2016	0	PBG	20	0	25	15	40
Pasture3A3	BGAD3A3	2016	0	PBG	50	0	30	20	40
Pasture3A3	BGAD3A3	2016	0	PBG	30	5	10	35	20
Pasture3A3	BGAD3A3	2016	0	PBG	25	0	5	50	20
Pasture3A3	BGAD3A3	2016	0	PBG	70	0	0	30	40
Pasture3A3	BGAD3A3	2016	0	PBG	80	0	15	5	40
Pasture3A3	BGAD3A3	2016	0	PBG	85	0	10	5	20
Pasture3A3	BGAD3A3	2016	0	PBG	60	25	10	5	10
Pasture3A3	BGAD3A3	2016	0	PBG	20	50	5	25	30
Pasture3A3	BGAD3A3	2016	0	PBG	20	5	0	75	30
Pasture3A3	BGAD3A3	2016	0	PBG	55	0	35	10	30
Pasture3A3	BGAD3A3	2016	0	PBG	70	15	10	5	40
Pasture3A3	BGAD3A3	2016	0	PBG	75	5	20	0	30
Pasture3A3	BGAD3A3	2016	0	PBG	80	0	20	0	50
Pasture3A3	BGAD3A3	2016	0	PBG	95	0	5	0	30
Pasture3A3	BGAD3A3	2016	0	PBG	85	0	15	0	40
Pasture3A3	BGAD3A3	2016	0	PBG	95	5	0	0	40
Pasture3A3	BGAD3A3	2016	0	PBG	100	0	0	0	50
Pasture3A3	BGAD3A3	2016	0	PBG	100	0	0	0	60
Pasture3A3	BGAD3A3	2016	0	PBG	75	10	15	0	40
Pasture3A3	BGAD3A3	2016	0	PBG	100	0	0	0	60
Pasture3A3	BGAD3A3	2016	0	PBG	80	0	20	0	60
Pasture3A3	BGAD3A3	2016	0	PBG	100	0	0	0	50
Pasture3A3	BGAD3A3	2016	0	PBG	20	0	80	0	30
Pasture3A3	BGAD3A3	2016	0	PBG	5	5	70	25	40
Pasture3A3	BGAD3A3	2016	0	PBG	15	5	80	0	50
Pasture3A3	BGAD3A3	2016	0	PBG	25	0	75	0	40
Pasture3A3	BGAD3A3	2016	0	PBG	20	0	80	0	50
Pasture3A3	BGAD3A3	2016	0	PBG	80	0	15	5	30
Pasture3A3	BGAD3A3	2016	0	PBG	100	0	0	0	110
Pasture3A3	BGAD3A3	2016	0	PBG	90	0	10	0	90
Pasture3A3	BGAD3A3	2016	0	PBG	90	0	10	0	100
Pasture3A3	BGAD3A3	2016	0	PBG	90	0	10	0	90
Pasture3A3	BGAD3A3	2016	0	PBG	95	5	0	0	80
Pasture3A3	BGAD3A3	2016	0	PBG	90	0	10	0	70
Pasture4A3	BGAD4A3	2016	0	ROT	70	5	15	10	30
Pasture4A3	BGAD4A3	2016	0	ROT	95	5	0	0	50
Pasture4A3	BGAD4A3	2016	0	ROT	100	0	0	0	20
Pasture4A3	BGAD4A3	2016	0	ROT	100	0	0	0	30
Pasture4A3	BGAD4A3	2016	0	ROT	100	0	0	0	30
Pasture4A3	BGAD4A3	2016	0	ROT	90	0	10	0	30
Pasture4A3	BGAD4A3	2016	0	ROT	95	5	0	0	30
Pasture4A3	BGAD4A3	2016	0	ROT	85	5	10	0	40
Pasture4A3	BGAD4A3	2016	0	ROT	55	40	5	0	30
Pasture4A3	BGAD4A3	2016	0	ROT	70	20	10	0	30
Pasture4A3	BGAD4A3	2016	0	ROT	45	10	40	5	40
Pasture4A3	BGAD4A3	2016	0	ROT	95	5	0	0	40
Pasture4A3	BGAD4A3	2016	0	ROT	95	5	0	0	40
Pasture4A3	BGAD4A3	2016	0	ROT	90	0	10	0	40
Pasture4A3	BGAD4A3	2016	0	ROT	100	0	0	0	40
Pasture4A3	BGAD4A3	2016	0	ROT	100	0	0	0	40
Pasture4A3	BGAD4A3	2016	0	ROT	95	0	5	0	30
Pasture4A3	BGAD4A3	2016	0	ROT	70	0	30	0	40
Pasture4A3	BGAD4A3	2016	0	ROT	95	0	5	0	40
Pasture4A3	BGAD4A3	2016	0	ROT	5	80	10	5	30
Pasture4A3	BGAD4A3	2016	0	ROT	5	95	0	0	0
Pasture4A3	BGAD4A3	2016	0	ROT	0	20	0	80	0
Pasture4A3	BGAD4A3	2016	0	ROT	80	5	0	15	40
Pasture4A3	BGAD4A3	2016	0	ROT	50	0	0	50	90
Pasture4A3	BGAD4A3	2016	0	ROT	80	10	10	0	30
Pasture4A3	BGAD4A3	2016	0	ROT	75	15	10	0	40
Pasture4A3	BGAD4A3	2016	0	ROT	80	5	10	5	30
Pasture4A3	BGAD4A3	2016	0	ROT	80	10	10	0	30
Pasture4A3	BGAD4A3	2016	0	ROT	70	0	30	0	40
Pasture4A3	BGAD4A3	2016	0	ROT	90	0	10	0	30
Pasture4A3	BGAD4A3	2016	0	ROT	50	0	0	50	70
Pasture4A3	BGAD4A3	2016	0	ROT	65	0	20	15	90
Pasture4A3	BGAD4A3	2016	0	ROT	65	5	30	0	50
Pasture4A3	BGAD4A3	2016	0	ROT	40	0	60	0	40
Pasture4A3	BGAD4A3	2016	0	ROT	50	0	20	30	30
Pasture4A3	BGAD4A3	2016	0	ROT	60	0	40	0	30

## Sheet: FISP2014
ID	Pasture	Year	use	TRT	Grass	Forb	Lit	BG	SubHgt
/*FISP0103(2014_BGAD*/	BGAD1A1	2014	1	CON	92.5	6.25	1.25	0	139
/*FISP0201*/	BGAD2A1	2014	1	CON	95	5	0	0	130
/*FISP0202*/	BGAD2A1	2014	1	CON	100	0	0	0	105
/*FISP0206*/	BGAD2B1	2014	1	CON	100	0	0	0	95
/*FISP0209*/	BGAD2B1	2014	1	CON	83.75	13.75	1.25	0	129
/*FISP0213*/	BGAD2B1	2014	1	CON	95	1.25	0	0	123
/*FISP0307*/	BGAD3B1	2014	1	CON	95	5	0	0	60
/*FISP0308*/	BGAD3C1	2014	1	CON	65	26	0	0	119
/*FISP0311*/	BGAD3B1	2014	1	CON	66.25	33.75	0	0	128
/*FISP0312*/	BGAD3B1	2014	1	CON	48.75	23.75	0	2.5	165
/*FISP0404*/	BGAD4B1	2014	1	CON	88.75	6.25	0	0	140
/*FISP0414*/	BGAD4B1	2014	1	CON	86.25	13.75	0	0	60
/*FISP0510*/	BGAD5B1	2014	1	CON	77.5	18.75	0	0	120
/*FISP01(2014_DREC)*/	DREC3A1	2014	1	CON	52.5	2.5	38.75	6.25	161
/*FISP02*/	DREC1A1	2014	1	CON	0	85	15	0	180
/*FISP03*/	DREC3A1	2014	1	CON	38.75	18.75	41.25	1.25	85
/*FISP04*/	DREC3A1	2014	1	CON	80	3.75	13.75	2.5	105
/*FISP05*/	DREC5A1	2014	1	CON	50	30	20	0	95
/*FISP06*/	DREC3A1	2014	1	CON	85	0	15	0	90
/*FISP07*/	DREC3A1	2014	1	CON	55	10	5	0	105
/*FISP08*/	DREC3A1	2014	1	CON	2.5	40	17.5	40	0
/*FISP09*/	DREC3B1	2014	1	CON	95	0	5	0	60
/*FISP10*/	DREC2B1	2014	1	CON	90	1.25	8.75	0	90
/*FISP11*/	DREC2B1	2014	1	CON	1.25	18.75	17.5	0	97
/*FISP12*/	DREC1B1	2014	1	CON	21.25	66.25	7.5	5	190
/*FISP13*/	DREC3B1	2014	1	CON	80	0	20	0	190
/*FISP14*/	DREC3B1	2014	1	CON	37.5	23.75	38.75	0	80
/*FISP15*/	DREC3B1	2014	1	CON	70	3.75	26.25	0	170
/*FISP16*/	DREC2B1	2014	1	CON	100	0	0	0	250
/*FISP17*/	DREC3B1	2014	1	CON	75	0	25	0	170
/*FISP18*/	DREC3B1	2014	1	CON	72.5	0	2.5	0	175
/*FISP19*/	DREC4B1	2014	1	CON	87.5	0	12.5	0	80
/*FISP20*/	DREC3B1	2014	1	CON	95	0	5	0	170
/*FISP21*/	DREC3C1	2014	1	CON	96.25	3.75	0	0	240
/*FISP22*/	DREC4C1	2014	1	CON	17.5	77.5	5	0	175
/*FISP23*/	DREC4B1	2014	1	CON	10	51.25	33.75	5	190
/*FISP24*/	DREC2C1	2014	1	CON	70	0	22.5	7.5	210
/*FISP25*/	DREC3C1	2014	1	CON	92.5	2.5	2.5	2.5	140
/*FISP26*/	DREC3C1	2014	1	CON	97.5	0	2.5	0	225
Pasture1A1	BGAD1A1	2014	0	CON	100	0	0	0	35
Pasture1A1	BGAD1A1	2014	0	CON	100	0	0	0	45
Pasture1A1	BGAD1A1	2014	0	CON	70	0	0	30	65
Pasture1A1	BGAD1A1	2014	0	CON	100	0	0	0	45
Pasture1A1	BGAD1A1	2014	0	CON	100	0	0	0	32
Pasture1A1	BGAD1A1	2014	0	CON	95	5	0	0	22
Pasture1A1	BGAD1A1	2014	0	CON	95	0	5	0	40
Pasture1A1	BGAD1A1	2014	0	CON	100	0	0	0	42
Pasture1A1	BGAD1A1	2014	0	CON	100	0	0	0	45
Pasture1A1	BGAD1A1	2014	0	CON	100	0	0	0	10
Pasture1A1	BGAD1A1	2014	0	CON	100	0	0	0	30
Pasture1A1	BGAD1A1	2014	0	CON	95	5	0	0	25
Pasture1A1	BGAD1A1	2014	0	CON	90	5	0	5	25
Pasture1A1	BGAD1A1	2014	0	CON	100	0	0	0	30
Pasture1A1	BGAD1A1	2014	0	CON	95	0	0	5	15
Pasture1A1	BGAD1A1	2014	0	CON	100	0	0	0	50
Pasture1A1	BGAD1A1	2014	0	CON	90	0	0	10	30
Pasture1A1	BGAD1A1	2014	0	CON	100	0	0	0	30
Pasture1A1	BGAD1A1	2014	0	CON	85	15	0	0	25
Pasture1A1	BGAD1A1	2014	0	CON	75	5	0	20	45
Pasture1A1	BGAD1A1	2014	0	CON	95	5	0	0	35
Pasture1A1	BGAD1A1	2014	0	CON	95	5	0	0	47
Pasture1A1	BGAD1A1	2014	0	CON	90	5	0	5	35
Pasture1A1	BGAD1A1	2014	0	CON	90	10	0	0	32
Pasture1A1	BGAD1A1	2014	0	CON	100	0	0	0	40
Pasture1A1	BGAD1A1	2014	0	CON	100	0	0	0	37
Pasture1A1	BGAD1A1	2014	0	CON	95	0	0	5	40
Pasture1A1	BGAD1A1	2014	0	CON	100	0	0	0	25
Pasture1A1	BGAD1A1	2014	0	CON	100	0	0	0	52
Pasture1A1	BGAD1A1	2014	0	CON	100	0	0	0	50
Pasture2A1	BGAD2A1	2014	0	CON	95	0	5	0	35
Pasture2A1	BGAD2A1	2014	0	CON	90	5	5	0	37
Pasture2A1	BGAD2A1	2014	0	CON	90	0	10	0	40
Pasture2A1	BGAD2A1	2014	0	CON	95	0	5	0	38
Pasture2A1	BGAD2A1	2014	0	CON	95	0	5	0	75
Pasture2A1	BGAD2A1	2014	0	CON	95	0	5	0	25
Pasture2A1	BGAD2A1	2014	0	CON	95	0	5	0	22
Pasture2A1	BGAD2A1	2014	0	CON	100	0	0	0	55
Pasture2A1	BGAD2A1	2014	0	CON	95	0	5	0	40
Pasture2A1	BGAD2A1	2014	0	CON	90	5	5	0	40
Pasture2A1	BGAD2A1	2014	0	CON	95	5	0	0	80
Pasture2A1	BGAD2A1	2014	0	CON	95	0	5	0	45
Pasture2A1	BGAD2A1	2014	0	CON	95	0	5	0	25
Pasture2A1	BGAD2A1	2014	0	CON	100	0	0	0	45
Pasture2A1	BGAD2A1	2014	0	CON	100	0	0	0	52
Pasture2A1	BGAD2A1	2014	0	CON	100	0	0	0	95
Pasture2A1	BGAD2A1	2014	0	CON	100	0	0	0	60
Pasture2A1	BGAD2A1	2014	0	CON	95	0	5	0	60
Pasture2A1	BGAD2A1	2014	0	CON	95	0	5	0	17
Pasture2A1	BGAD2A1	2014	0	CON	85	5	10	0	40
Pasture2A1	BGAD2A1	2014	0	CON	80	15	5	0	25
Pasture2A1	BGAD2A1	2014	0	CON	85	15	0	0	40
Pasture2A1	BGAD2A1	2014	0	CON	95	5	0	0	25
Pasture2A1	BGAD2A1	2014	0	CON	85	10	5	0	40
Pasture2A1	BGAD2A1	2014	0	CON	60	40	0	0	50
Pasture2A1	BGAD2A1	2014	0	CON	55	45	0	0	50
Pasture2A1	BGAD2A1	2014	0	CON	80	20	0	0	35
Pasture2A1	BGAD2A1	2014	0	CON	75	25	0	0	50
Pasture2A1	BGAD2A1	2014	0	CON	85	10	5	0	25
Pasture2A1	BGAD2A1	2014	0	CON	100	0	0	0	55
Pasture2A1	BGAD2A1	2014	0	CON	95	5	0	0	45
Pasture2A1	BGAD2A1	2014	0	CON	75	25	0	0	30
Pasture2A1	BGAD2A1	2014	0	CON	90	10	0	0	80
Pasture2A1	BGAD2A1	2014	0	CON	85	15	0	0	35
Pasture2A1	BGAD2A1	2014	0	CON	95	5	0	0	35
Pasture2A1	BGAD2A1	2014	0	CON	70	25	5	0	45
Pasture2B1	BGAD2B1	2014	0	CON	85	15	0	0	65
Pasture2B1	BGAD2B1	2014	0	CON	50	50	0	0	80
Pasture2B1	BGAD2B1	2014	0	CON	100	0	0	0	75
Pasture2B1	BGAD2B1	2014	0	CON	100	0	0	0	90
Pasture2B1	BGAD2B1	2014	0	CON	100	0	0	0	75
Pasture2B1	BGAD2B1	2014	0	CON	100	0	0	0	75
Pasture2B1	BGAD2B1	2014	0	CON	100	0	0	0	75
Pasture2B1	BGAD2B1	2014	0	CON	95	5	0	0	75
Pasture2B1	BGAD2B1	2014	0	CON	100	0	0	0	90
Pasture2B1	BGAD2B1	2014	0	CON	80	20	0	0	85
Pasture2B1	BGAD2B1	2014	0	CON	100	0	0	0	80
Pasture2B1	BGAD2B1	2014	0	CON	100	0	0	0	65
Pasture2B1	BGAD2B1	2014	0	CON	100	0	0	0	110
Pasture2B1	BGAD2B1	2014	0	CON	100	0	0	0	130
Pasture2B1	BGAD2B1	2014	0	CON	100	0	0	0	95
Pasture2B1	BGAD2B1	2014	0	CON	100	0	0	0	135
Pasture2B1	BGAD2B1	2014	0	CON	100	0	0	0	115
Pasture2B1	BGAD2B1	2014	0	CON	100	0	0	0	55
Pasture2B1	BGAD2B1	2014	0	CON	100	0	0	0	90
Pasture2B1	BGAD2B1	2014	0	CON	100	0	0	0	65
Pasture2B1	BGAD2B1	2014	0	CON	100	0	0	0	60
Pasture2B1	BGAD2B1	2014	0	CON	100	0	0	0	55
Pasture2B1	BGAD2B1	2014	0	CON	70	0	0	30	55
Pasture2B1	BGAD2B1	2014	0	CON	80	0	0	20	40
Pasture2B1	BGAD2B1	2014	0	CON	55	45	0	0	80
Pasture2B1	BGAD2B1	2014	0	CON	80	20	0	0	145
Pasture2B1	BGAD2B1	2014	0	CON	85	15	0	0	85
Pasture2B1	BGAD2B1	2014	0	CON	85	15	0	0	65
Pasture2B1	BGAD2B1	2014	0	CON	20	80	0	0	90
Pasture2B1	BGAD2B1	2014	0	CON	35	65	0	0	95
Pasture2B1	BGAD2B1	2014	0	CON	50	10	0	0	105
Pasture2B1	BGAD2B1	2014	0	CON	25	75	0	0	70
Pasture2B1	BGAD2B1	2014	0	CON	55	45	0	0	100
Pasture2B1	BGAD2B1	2014	0	CON	60	40	0	0	85
Pasture2B1	BGAD2B1	2014	0	CON	25	75	0	0	90
Pasture2B1	BGAD2B1	2014	0	CON	15	85	0	0	75
Pasture3B1	BGAD3B1	2014	0	CON	80	20	0	0	71
Pasture3B1	BGAD3B1	2014	0	CON	100	0	0	0	91
Pasture3B1	BGAD3B1	2014	0	CON	45	55	0	0	65
Pasture3B1	BGAD3B1	2014	0	CON	65	35	0	0	83
Pasture3B1	BGAD3B1	2014	0	CON	90	10	0	0	65
Pasture3B1	BGAD3B1	2014	0	CON	85	15	0	0	70
Pasture3B1	BGAD3B1	2014	0	CON	100	0	0	0	61
Pasture3B1	BGAD3B1	2014	0	CON	90	10	0	0	84
Pasture3B1	BGAD3B1	2014	0	CON	95	5	0	0	72
Pasture3B1	BGAD3B1	2014	0	CON	100	0	0	0	73
Pasture3B1	BGAD3B1	2014	0	CON	95	5	0	0	85
Pasture3B1	BGAD3B1	2014	0	CON	60	40	0	0	89
Pasture3B1	BGAD3B1	2014	0	CON	95	5	0	0	82
Pasture3B1	BGAD3B1	2014	0	CON	100	0	0	0	56
Pasture3B1	BGAD3B1	2014	0	CON	100	0	0	0	70
Pasture3B1	BGAD3B1	2014	0	CON	90	10	0	0	80
Pasture3B1	BGAD3B1	2014	0	CON	40	60	0	0	101
Pasture3B1	BGAD3B1	2014	0	CON	90	10	0	0	67
Pasture3B1	BGAD3B1	2014	0	CON	40	60	0	0	83
Pasture3B1	BGAD3B1	2014	0	CON	85	15	0	0	36
Pasture3B1	BGAD3B1	2014	0	CON	90	10	0	0	50
Pasture3B1	BGAD3B1	2014	0	CON	95	5	0	0	51
Pasture3B1	BGAD3B1	2014	0	CON	60	40	0	0	68
Pasture3B1	BGAD3B1	2014	0	CON	95	5	0	0	90
Pasture3B1	BGAD3B1	2014	0	CON	85	15	0	0	122
Pasture3B1	BGAD3B1	2014	0	CON	100	0	0	0	83
Pasture3B1	BGAD3B1	2014	0	CON	95	5	0	0	101
Pasture3B1	BGAD3B1	2014	0	CON	85	15	0	0	97
Pasture3B1	BGAD3B1	2014	0	CON	0	100	0	0	70
Pasture3B1	BGAD3B1	2014	0	CON	70	30	0	0	76
Pasture3B1	BGAD3B1	2014	0	CON	90	10	0	0	94
Pasture3B1	BGAD3B1	2014	0	CON	100	0	0	0	103
Pasture3B1	BGAD3B1	2014	0	CON	80	20	0	0	100
Pasture3B1	BGAD3B1	2014	0	CON	95	5	0	0	110
Pasture3B1	BGAD3B1	2014	0	CON	95	5	0	0	112
Pasture3B1	BGAD3B1	2014	0	CON	85	15	0	0	101
Pasture3B1	BGAD3B1	2014	0	CON	65	35	0	0	135
Pasture3B1	BGAD3B1	2014	0	CON	95	5	0	0	86
Pasture3B1	BGAD3B1	2014	0	CON	35	65	0	0	96
Pasture3B1	BGAD3B1	2014	0	CON	5	95	0	0	47
Pasture3B1	BGAD3B1	2014	0	CON	0	100	0	0	73
Pasture3B1	BGAD3B1	2014	0	CON	20	80	0	0	75
Pasture4B1	BGAD4B1	2014	0	CON	65	35	0	0	79
Pasture4B1	BGAD4B1	2014	0	CON	80	20	0	0	94
Pasture4B1	BGAD4B1	2014	0	CON	75	25	0	0	41
Pasture4B1	BGAD4B1	2014	0	CON	90	10	0	0	80
Pasture4B1	BGAD4B1	2014	0	CON	30	70	0	0	81
Pasture4B1	BGAD4B1	2014	0	CON	90	10	0	0	26
Pasture4B1	BGAD4B1	2014	0	CON	95	5	0	0	54
Pasture4B1	BGAD4B1	2014	0	CON	85	15	0	0	70
Pasture4B1	BGAD4B1	2014	0	CON	100	0	0	0	73
Pasture4B1	BGAD4B1	2014	0	CON	95	5	0	0	82
Pasture4B1	BGAD4B1	2014	0	CON	90	10	0	0	65
Pasture4B1	BGAD4B1	2014	0	CON	90	10	0	0	96
Pasture4B1	BGAD4B1	2014	0	CON	95	5	0	0	96
Pasture4B1	BGAD4B1	2014	0	CON	70	30	0	0	71
Pasture4B1	BGAD4B1	2014	0	CON	90	10	0	0	62
Pasture4B1	BGAD4B1	2014	0	CON	90	10	0	0	77
Pasture4B1	BGAD4B1	2014	0	CON	95	5	0	0	70
Pasture4B1	BGAD4B1	2014	0	CON	95	5	0	0	61
Pasture4B1	BGAD4B1	2014	0	CON	80	20	0	0	66
Pasture4B1	BGAD4B1	2014	0	CON	70	30	0	0	83
Pasture4B1	BGAD4B1	2014	0	CON	40	60	0	0	112
Pasture4B1	BGAD4B1	2014	0	CON	90	10	0	0	26
Pasture4B1	BGAD4B1	2014	0	CON	55	45	0	0	94
Pasture4B1	BGAD4B1	2014	0	CON	95	5	0	0	104
Pasture4B1	BGAD4B1	2014	0	CON	45	55	0	0	87
Pasture4B1	BGAD4B1	2014	0	CON	95	5	0	0	63
Pasture4B1	BGAD4B1	2014	0	CON	75	25	0	0	35
Pasture4B1	BGAD4B1	2014	0	CON	80	20	0	0	106
Pasture4B1	BGAD4B1	2014	0	CON	85	15	0	0	88
Pasture4B1	BGAD4B1	2014	0	CON	75	25	0	0	132
Pasture4B1	BGAD4B1	2014	0	CON	70	30	0	0	86
Pasture4B1	BGAD4B1	2014	0	CON	55	45	0	0	120
Pasture4B1	BGAD4B1	2014	0	CON	90	10	0	0	98
Pasture4B1	BGAD4B1	2014	0	CON	85	15	0	0	62
Pasture4B1	BGAD4B1	2014	0	CON	75	25	0	0	98
Pasture4B1	BGAD4B1	2014	0	CON	80	20	0	0	70
Pasture4B1	BGAD4B1	2014	0	CON	95	5	0	0	66
Pasture4B1	BGAD4B1	2014	0	CON	95	5	0	0	87
Pasture4B1	BGAD4B1	2014	0	CON	100	0	0	0	99
Pasture4B1	BGAD4B1	2014	0	CON	90	10	0	0	77
Pasture4B1	BGAD4B1	2014	0	CON	95	5	0	0	121
Pasture4B1	BGAD4B1	2014	0	CON	95	5	0	0	86
Pasture5B1	BGAD5B1	2014	0	CON	75	25	0	0	138
Pasture5B1	BGAD5B1	2014	0	CON	70	30	0	0	102
Pasture5B1	BGAD5B1	2014	0	CON	45	55	0	0	90
Pasture5B1	BGAD5B1	2014	0	CON	90	10	0	0	75
Pasture5B1	BGAD5B1	2014	0	CON	85	15	0	0	70
Pasture5B1	BGAD5B1	2014	0	CON	85	15	0	0	68
Pasture5B1	BGAD5B1	2014	0	CON	95	5	0	0	60
Pasture5B1	BGAD5B1	2014	0	CON	40	60	0	0	141
Pasture5B1	BGAD5B1	2014	0	CON	80	20	0	0	124
Pasture5B1	BGAD5B1	2014	0	CON	70	30	0	0	87
Pasture5B1	BGAD5B1	2014	0	CON	95	5	0	0	79
Pasture5B1	BGAD5B1	2014	0	CON	80	20	0	0	93
Pasture3C1	BGAD3C1	2014	0	CON	100	0	0	0	62
Pasture3C1	BGAD3C1	2014	0	CON	90	5	0	5	71
Pasture3C1	BGAD3C1	2014	0	CON	100	0	0	0	89
Pasture3C1	BGAD3C1	2014	0	CON	95	5	0	0	74
Pasture3C1	BGAD3C1	2014	0	CON	100	0	0	0	78
Pasture3C1	BGAD3C1	2014	0	CON	30	60	0	10	80
Pasture3C1	BGAD3C1	2014	0	CON	90	10	0	0	77
Pasture3C1	BGAD3C1	2014	0	CON	90	10	0	0	82
Pasture3C1	BGAD3C1	2014	0	CON	70	30	0	0	71
Pasture3C1	BGAD3C1	2014	0	CON	100	0	0	0	71
Pasture3C1	BGAD3C1	2014	0	CON	80	20	0	0	120
Pasture3C1	BGAD3C1	2014	0	CON	45	55	0	0	66
Pasture3C1	BGAD3C1	2014	0	CON	95	5	0	0	99
Pasture3C1	BGAD3C1	2014	0	CON	95	5	0	0	111
Pasture3C1	BGAD3C1	2014	0	CON	100	0	0	0	65
Pasture3C1	BGAD3C1	2014	0	CON	70	30	0	0	86
Pasture3C1	BGAD3C1	2014	0	CON	90	10	0	0	91
Pasture3C1	BGAD3C1	2014	0	CON	95	10	0	0	114
Pasture3C1	BGAD3C1	2014	0	CON	60	0	0	0	59
Pasture3C1	BGAD3C1	2014	0	CON	5	0	0	0	105
Pasture3C1	BGAD3C1	2014	0	CON	95	0	0	0	74
Pasture3C1	BGAD3C1	2014	0	CON	10	20	0	70	33
Pasture3C1	BGAD3C1	2014	0	CON	95	0	0	0	28
Pasture3C1	BGAD3C1	2014	0	CON	100	0	0	0	49
Pasture3C1	BGAD3C1	2014	0	CON	100	0	0	0	83
Pasture3C1	BGAD3C1	2014	0	CON	90	10	0	0	82
Pasture3C1	BGAD3C1	2014	0	CON	85	15	0	0	103
Pasture3C1	BGAD3C1	2014	0	CON	95	5	0	0	91
Pasture3C1	BGAD3C1	2014	0	CON	95	5	0	0	101
Pasture3C1	BGAD3C1	2014	0	CON	90	10	0	0	99
Pasture3C1	BGAD3C1	2014	0	CON	85	15	0	0	106
Pasture3C1	BGAD3C1	2014	0	CON	10	90	0	0	83
Pasture3C1	BGAD3C1	2014	0	CON	20	80	0	0	104
Pasture3C1	BGAD3C1	2014	0	CON	90	10	0	0	70
Pasture3C1	BGAD3C1	2014	0	CON	5	95	0	0	102
Pasture3C1	BGAD3C1	2014	0	CON	60	40	0	0	135
Pasture3C1	BGAD3C1	2014	0	CON	80	20	0	0	80
Pasture3C1	BGAD3C1	2014	0	CON	90	10	0	0	60
Pasture3C1	BGAD3C1	2014	0	CON	95	5	0	0	82
Pasture3C1	BGAD3C1	2014	0	CON	90	10	0	0	61
Pasture3C1	BGAD3C1	2014	0	CON	90	10	0	0	193
Pasture3C1	BGAD3C1	2014	0	CON	95	5	0	0	64
Pasture1A1	DREC1A1	2014	0	CON	40	5	0	55	55
Pasture1A1	DREC1A1	2014	0	CON	70	0	30	0	65
Pasture1A1	DREC1A1	2014	0	CON	15	20	65	0	45
Pasture1A1	DREC1A1	2014	0	CON	95	0	5	0	75
Pasture1A1	DREC1A1	2014	0	CON	25	5	70	0	45
Pasture1A1	DREC1A1	2014	0	CON	45	5	50	0	70
Pasture1A1	DREC1A1	2014	0	CON	5	0	90	5	0
Pasture1A1	DREC1A1	2014	0	CON	80	5	15	0	45
Pasture1A1	DREC1A1	2014	0	CON	5	5	85	5	5
Pasture1A1	DREC1A1	2014	0	CON	95	0	5	0	50
Pasture1A1	DREC1A1	2014	0	CON	40	0	55	5	75
Pasture1A1	DREC1A1	2014	0	CON	100	0	0	0	80
Pasture1A1	DREC1A1	2014	0	CON	25	0	75	0	30
Pasture1A1	DREC1A1	2014	0	CON	10	0	30	60	0
Pasture1A1	DREC1A1	2014	0	CON	100	0	0	0	140
Pasture1A1	DREC1A1	2014	0	CON	100	0	0	0	80
Pasture1A1	DREC1A1	2014	0	CON	80	0	20	0	50
Pasture1A1	DREC1A1	2014	0	CON	0	0	100	0	0
Pasture1A1	DREC1A1	2014	0	CON	50	0	50	0	10
Pasture1A1	DREC1A1	2014	0	CON	10	5	85	0	45
Pasture1A1	DREC1A1	2014	0	CON	5	0	85	10	105
Pasture1A1	DREC1A1	2014	0	CON	90	5	5	0	50
Pasture1A1	DREC1A1	2014	0	CON	15	5	80	0	80
Pasture1A1	DREC1A1	2014	0	CON	65	30	5	0	100
Pasture2A1	DREC2A1	2014	0	CON	15	5	5	5	30
Pasture2A1	DREC2A1	2014	0	CON	70	0	25	5	90
Pasture2A1	DREC2A1	2014	0	CON	95	0	5	0	70
Pasture2A1	DREC2A1	2014	0	CON	80	0	20	0	60
Pasture2A1	DREC2A1	2014	0	CON	30	0	45	20	55
Pasture2A1	DREC2A1	2014	0	CON	35	5	50	10	60
Pasture2A1	DREC2A1	2014	0	CON	25	5	70	0	35
Pasture2A1	DREC2A1	2014	0	CON	25	0	75	0	70
Pasture2A1	DREC2A1	2014	0	CON	30	5	65	0	70
Pasture2A1	DREC2A1	2014	0	CON	15	0	75	5	20
Pasture2A1	DREC2A1	2014	0	CON	80	0	20	0	85
Pasture2A1	DREC2A1	2014	0	CON	30	20	50	0	30
Pasture2A1	DREC2A1	2014	0	CON	50	0	45	5	25
Pasture2A1	DREC2A1	2014	0	CON	35	0	65	0	60
Pasture2A1	DREC2A1	2014	0	CON	10	0	70	20	25
Pasture2A1	DREC2A1	2014	0	CON	20	0	10	70	40
Pasture2A1	DREC2A1	2014	0	CON	20	5	65	10	40
Pasture2A1	DREC2A1	2014	0	CON	15	5	80	0	40
Pasture2A1	DREC2A1	2014	0	CON	20	0	75	5	40
Pasture2A1	DREC2A1	2014	0	CON	40	5	55	0	70
Pasture2A1	DREC2A1	2014	0	CON	10	5	85	0	70
Pasture2A1	DREC2A1	2014	0	CON	40	0	60	0	65
Pasture2A1	DREC2A1	2014	0	CON	40	5	55	0	25
Pasture2A1	DREC2A1	2014	0	CON	70	5	25	0	55
Pasture3A1	DREC3A1	2014	0	CON	70	0	20	10	0
Pasture3A1	DREC3A2	2014	0	CON	85	0	10	5	50
Pasture3A1	DREC3A3	2014	0	CON	95	0	0	5	55
Pasture3A1	DREC3A4	2014	0	CON	85	0	10	5	70
Pasture3A1	DREC3A5	2014	0	CON	85	0	10	5	60
Pasture3A1	DREC3A6	2014	0	CON	95	0	5	0	50
Pasture3A1	DREC3A7	2014	0	CON	5	5	70	20	0
Pasture3A1	DREC3A8	2014	0	CON	80	0	15	5	50
Pasture3A1	DREC3A9	2014	0	CON	45	0	55	0	60
Pasture3A1	DREC3A10	2014	0	CON	70	0	30	0	40
Pasture3A1	DREC3A11	2014	0	CON	30	5	65	0	70
Pasture3A1	DREC3A12	2014	0	CON	45	0	55	0	60
Pasture3A1	DREC3A13	2014	0	CON	10	10	80	0	25
Pasture3A1	DREC3A14	2014	0	CON	20	5	75	0	60
Pasture3A1	DREC3A15	2014	0	CON	45	5	50	0	55
Pasture3A1	DREC3A16	2014	0	CON	75	0	25	0	35
Pasture3A1	DREC3A17	2014	0	CON	10	0	90	0	35
Pasture3A1	DREC3A18	2014	0	CON	55	0	45	0	30
Pasture3A1	DREC3A19	2014	0	CON	5	60	30	5	5
Pasture3A1	DREC3A20	2014	0	CON	30	20	30	20	0
Pasture3A1	DREC3A21	2014	0	CON	60	5	30	5	60
Pasture3A1	DREC3A22	2014	0	CON	25	5	60	10	30
Pasture3A1	DREC3A23	2014	0	CON	45	5	45	5	60
Pasture3A1	DREC3A24	2014	0	CON	95	0	5	0	50
Pasture5A1	DREC5A1	2014	0	CON	60	0	40	0	65
Pasture5A1	DREC5A1	2014	0	CON	70	5	25	0	55
Pasture5A1	DREC5A1	2014	0	CON	70	0	30	0	55
Pasture5A1	DREC5A1	2014	0	CON	30	5	65	0	30
Pasture5A1	DREC5A1	2014	0	CON	25	5	70	0	60
Pasture5A1	DREC5A1	2014	0	CON	95	0	5	0	75
Pasture5A1	DREC5A1	2014	0	CON	30	5	50	15	30
Pasture5A1	DREC5A1	2014	0	CON	15	10	65	10	55
Pasture5A1	DREC5A1	2014	0	CON	50	0	50	0	50
Pasture5A1	DREC5A1	2014	0	CON	35	0	10	55	20
Pasture5A1	DREC5A1	2014	0	CON	30	0	10	60	65
Pasture5A1	DREC5A1	2014	0	CON	55	0	45	0	30
Pasture5A1	DREC5A1	2014	0	CON	50	5	45	0	40
Pasture5A1	DREC5A1	2014	0	CON	55	0	35	10	50
Pasture5A1	DREC5A1	2014	0	CON	50	45	5	0	60
Pasture5A1	DREC5A1	2014	0	CON	50	5	35	10	60
Pasture5A1	DREC5A1	2014	0	CON	15	0	10	75	30
Pasture5A1	DREC5A1	2014	0	CON	35	5	30	30	35
Pasture5A1	DREC5A1	2014	0	CON	25	5	10	60	50
Pasture5A1	DREC5A1	2014	0	CON	95	0	5	0	65
Pasture5A1	DREC5A1	2014	0	CON	95	0	5	0	70
Pasture5A1	DREC5A1	2014	0	CON	90	5	5	0	65
Pasture5A1	DREC5A1	2014	0	CON	40	25	30	5	40
Pasture5A1	DREC5A1	2014	0	CON	90	0	5	5	50
Pasture5A1	DREC5A1	2014	0	CON	0	5	5	90	0
Pasture5A1	DREC5A1	2014	0	CON	15	0	15	70	25
Pasture5A1	DREC5A1	2014	0	CON	10	0	35	55	25
Pasture5A1	DREC5A1	2014	0	CON	35	5	60	0	55
Pasture5A1	DREC5A1	2014	0	CON	50	0	45	5	60
Pasture5A1	DREC5A1	2014	0	CON	70	0	5	25	50
Pasture1B1	DREC1B1	2014	0	CON	35	0	10	55	55
Pasture1B1	DREC1B1	2014	0	CON	5	20	5	70	55
Pasture1B1	DREC1B1	2014	0	CON	35	5	5	55	85
Pasture1B1	DREC1B1	2014	0	CON	30	5	65	0	65
Pasture1B1	DREC1B1	2014	0	CON	5	0	95	0	40
Pasture1B1	DREC1B1	2014	0	CON	90	0	5	5	65
Pasture1B1	DREC1B1	2014	0	CON	10	0	85	5	30
Pasture1B1	DREC1B1	2014	0	CON	10	0	40	50	180
Pasture1B1	DREC1B1	2014	0	CON	40	0	50	10	65
Pasture1B1	DREC1B1	2014	0	CON	100	0	0	0	100
Pasture1B1	DREC1B1	2014	0	CON	85	0	15	0	85
Pasture1B1	DREC1B1	2014	0	CON	50	0	30	20	100
Pasture1B1	DREC1B1	2014	0	CON	90	0	5	5	50
Pasture1B1	DREC1B1	2014	0	CON	0	5	95	0	50
Pasture1B1	DREC1B1	2014	0	CON	0	25	70	5	30
Pasture1B1	DREC1B1	2014	0	CON	80	10	0	10	35
Pasture1B1	DREC1B1	2014	0	CON	0	15	10	75	15
Pasture1B1	DREC1B1	2014	0	CON	10	0	5	85	0
Pasture1B1	DREC1B1	2014	0	CON	5	5	75	15	35
Pasture1B1	DREC1B1	2014	0	CON	100	0	0	0	135
Pasture1B1	DREC1B1	2014	0	CON	100	0	0	0	110
Pasture1B1	DREC1B1	2014	0	CON	90	5	5	0	95
Pasture1B1	DREC1B1	2014	0	CON	50	0	25	25	55
Pasture1B1	DREC1B1	2014	0	CON	100	0	0	0	80
Pasture2B1	DREC2B1	2014	0	CON	90	0	10	0	20
Pasture2B1	DREC2B1	2014	0	CON	85	0	15	0	70
Pasture2B1	DREC2B1	2014	0	CON	50	0	50	0	80
Pasture2B1	DREC2B1	2014	0	CON	80	0	20	0	80
Pasture2B1	DREC2B1	2014	0	CON	25	0	70	5	15
Pasture2B1	DREC2B1	2014	0	CON	5	0	20	75	40
Pasture2B1	DREC2B1	2014	0	CON	50	0	50	0	70
Pasture2B1	DREC2B1	2014	0	CON	80	0	20	0	110
Pasture2B1	DREC2B1	2014	0	CON	80	0	20	0	80
Pasture2B1	DREC2B1	2014	0	CON	85	5	10	0	100
Pasture2B1	DREC2B1	2014	0	CON	95	0	5	0	80
Pasture2B1	DREC2B1	2014	0	CON	70	0	10	0	70
Pasture2B1	DREC2B1	2014	0	CON	65	0	20	15	45
Pasture2B1	DREC2B1	2014	0	CON	70	0	30	0	50
Pasture2B1	DREC2B1	2014	0	CON	85	0	15	0	55
Pasture2B1	DREC2B1	2014	0	CON	70	0	30	0	200
Pasture2B1	DREC2B1	2014	0	CON	85	0	15	0	90
Pasture2B1	DREC2B1	2014	0	CON	80	0	20	0	120
Pasture2B1	DREC2B1	2014	0	CON	70	0	25	5	50
Pasture2B1	DREC2B1	2014	0	CON	85	0	15	0	75
Pasture2B1	DREC2B1	2014	0	CON	15	0	25	60	60
Pasture2B1	DREC2B1	2014	0	CON	100	0	0	0	80
Pasture2B1	DREC2B1	2014	0	CON	60	0	40	0	75
Pasture2B1	DREC2B1	2014	0	CON	60	0	40	0	80
Pasture3B1	DREC3B1	2014	0	CON	75	5	20	0	65
Pasture3B1	DREC3B1	2014	0	CON	100	0	0	0	90
Pasture3B1	DREC3B1	2014	0	CON	40	5	55	0	50
Pasture3B1	DREC3B1	2014	0	CON	0	35	55	10	25
Pasture3B1	DREC3B1	2014	0	CON	20	10	70	0	70
Pasture3B1	DREC3B1	2014	0	CON	5	30	15	50	5
Pasture3B1	DREC3B1	2014	0	CON	60	40	0	0	90
Pasture3B1	DREC3B1	2014	0	CON	100	0	0	0	115
Pasture3B1	DREC3B1	2014	0	CON	70	15	15	0	65
Pasture3B1	DREC3B1	2014	0	CON	100	0	0	0	95
Pasture3B1	DREC3B1	2014	0	CON	100	0	0	0	105
Pasture3B1	DREC3B1	2014	0	CON	60	0	40	0	115
Pasture3B1	DREC3B1	2014	0	CON	5	0	10	0	30
Pasture3B1	DREC3B1	2014	0	CON	100	85	0	0	110
Pasture3B1	DREC3B1	2014	0	CON	100	0	0	0	85
Pasture3B1	DREC3B1	2014	0	CON	100	0	0	0	100
Pasture3B1	DREC3B1	2014	0	CON	100	0	0	0	100
Pasture3B1	DREC3B1	2014	0	CON	35	0	45	20	90
Pasture3B1	DREC3B1	2014	0	CON	75	0	20	5	70
Pasture3B1	DREC3B1	2014	0	CON	40	10	50	0	80
Pasture3B1	DREC3B1	2014	0	CON	60	0	40	0	80
Pasture3B1	DREC3B1	2014	0	CON	60	0	35	5	80
Pasture3B1	DREC3B1	2014	0	CON	40	0	55	5	80
Pasture3B1	DREC3B1	2014	0	CON	90	0	10	0	85
Pasture4B1	DREC4B1	2014	0	CON	70	0	25	5	55
Pasture4B1	DREC4B1	2014	0	CON	15	0	25	60	40
Pasture4B1	DREC4B1	2014	0	CON	25	0	70	5	40
Pasture4B1	DREC4B1	2014	0	CON	20	0	75	5	50
Pasture4B1	DREC4B1	2014	0	CON	15	0	75	10	45
Pasture4B1	DREC4B1	2014	0	CON	90	0	10	0	85
Pasture4B1	DREC4B1	2014	0	CON	35	0	55	10	50
Pasture4B1	DREC4B1	2014	0	CON	5	0	75	20	10
Pasture4B1	DREC4B1	2014	0	CON	20	0	65	15	65
Pasture4B1	DREC4B1	2014	0	CON	90	0	0	10	55
Pasture4B1	DREC4B1	2014	0	CON	20	0	65	15	50
Pasture4B1	DREC4B1	2014	0	CON	5	0	50	45	5
Pasture4B1	DREC4B1	2014	0	CON	90	0	10	0	60
Pasture4B1	DREC4B1	2014	0	CON	100	0	0	0	70
Pasture4B1	DREC4B1	2014	0	CON	100	0	0	0	90
Pasture4B1	DREC4B1	2014	0	CON	95	0	5	0	95
Pasture4B1	DREC4B1	2014	0	CON	40	0	50	10	100
Pasture4B1	DREC4B1	2014	0	CON	95	0	0	5	70
Pasture4B1	DREC4B1	2014	0	CON	90	0	30	10	40
Pasture4B1	DREC4B1	2014	0	CON	15	5	80	0	50
Pasture4B1	DREC4B1	2014	0	CON	5	0	95	0	35
Pasture4B1	DREC4B1	2014	0	CON	35	0	55	10	75
Pasture4B1	DREC4B1	2014	0	CON	20	5	75	0	55
Pasture4B1	DREC4B1	2014	0	CON	5	5	25	65	45
Pasture2C1	DREC2C1	2014	0	CON	50	0	25	25	120
Pasture2C1	DREC2C1	2014	0	CON	70	0	30	0	95
Pasture2C1	DREC2C1	2014	0	CON	100	0	0	0	120
Pasture2C1	DREC2C1	2014	0	CON	100	0	0	0	125
Pasture2C1	DREC2C1	2014	0	CON	100	0	0	0	200
Pasture2C1	DREC2C1	2014	0	CON	100	0	0	0	95
Pasture2C1	DREC2C1	2014	0	CON	90	0	10	0	70
Pasture2C1	DREC2C1	2014	0	CON	100	0	0	0	130
Pasture2C1	DREC2C1	2014	0	CON	100	0	0	0	65
Pasture2C1	DREC2C1	2014	0	CON	90	0	0	10	85
Pasture2C1	DREC2C1	2014	0	CON	100	0	0	0	120
Pasture2C1	DREC2C1	2014	0	CON	100	0	0	0	125
Pasture2C1	DREC2C1	2014	0	CON	80	0	15	5	110
Pasture2C1	DREC2C1	2014	0	CON	30	0	65	5	220
Pasture2C1	DREC2C1	2014	0	CON	100	0	0	0	140
Pasture2C1	DREC2C1	2014	0	CON	100	0	0	0	165
Pasture2C1	DREC2C1	2014	0	CON	100	0	0	0	130
Pasture2C1	DREC2C1	2014	0	CON	100	0	0	0	130
Pasture2C1	DREC2C1	2014	0	CON	90	0	10	0	70
Pasture2C1	DREC2C1	2014	0	CON	60	0	40	0	115
Pasture2C1	DREC2C1	2014	0	CON	70	0	30	0	120
Pasture2C1	DREC2C1	2014	0	CON	85	0	15	0	115
Pasture2C1	DREC2C1	2014	0	CON	80	20	0	0	130
Pasture2C1	DREC2C1	2014	0	CON	40	0	60	0	140
Pasture2C1	DREC2C1	2014	0	CON	100	0	0	0	120
Pasture2C1	DREC2C1	2014	0	CON	70	0	30	0	160
Pasture2C1	DREC2C1	2014	0	CON	100	0	0	0	110
Pasture2C1	DREC2C1	2014	0	CON	80	0	20	0	90
Pasture2C1	DREC2C1	2014	0	CON	80	0	20	0	115
Pasture2C1	DREC2C1	2014	0	CON	100	0	0	0	145
Pasture2C1	DREC2C1	2014	0	CON	75	0	10	15	90
Pasture2C1	DREC2C1	2014	0	CON	100	0	0	0	100
Pasture2C1	DREC2C1	2014	0	CON	100	0	0	0	155
Pasture2C1	DREC2C1	2014	0	CON	100	0	0	0	120
Pasture2C1	DREC2C1	2014	0	CON	60	0	40	0	155
Pasture2C1	DREC2C1	2014	0	CON	70	0	20	10	110
Pasture3C1	DREC3C1	2014	0	CON	20	5	35	40	60
Pasture3C1	DREC3C1	2014	0	CON	100	0	0	0	60
Pasture3C1	DREC3C1	2014	0	CON	60	15	15	0	40
Pasture3C1	DREC3C1	2014	0	CON	0	5	20	75	11
Pasture3C1	DREC3C1	2014	0	CON	0	20	15	75	15
Pasture3C1	DREC3C1	2014	0	CON	0	40	10	50	18
Pasture3C1	DREC3C1	2014	0	CON	80	0	20	0	75
Pasture3C1	DREC3C1	2014	0	CON	100	0	0	0	120
Pasture3C1	DREC3C1	2014	0	CON	100	0	0	0	120
Pasture3C1	DREC3C1	2014	0	CON	100	0	0	0	185
Pasture3C1	DREC3C1	2014	0	CON	80	0	20	0	110
Pasture3C1	DREC3C1	2014	0	CON	75	0	20	5	105
Pasture4C1	DREC4C1	2014	0	CON	100	0	0	0	80
Pasture4C1	DREC4C1	2014	0	CON	70	0	0	30	0
Pasture4C1	DREC4C1	2014	0	CON	80	0	20	0	95
Pasture4C1	DREC4C1	2014	0	CON	80	0	10	10	75
Pasture4C1	DREC4C1	2014	0	CON	70	20	10	0	60
Pasture4C1	DREC4C1	2014	0	CON	85	0	10	5	120
Pasture4C1	DREC4C1	2014	0	CON	50	0	50	0	30
Pasture4C1	DREC4C1	2014	0	CON	100	0	0	0	90
Pasture4C1	DREC4C1	2014	0	CON	100	0	0	0	80
Pasture4C1	DREC4C1	2014	0	CON	90	0	10	0	90
Pasture4C1	DREC4C1	2014	0	CON	90	0	10	0	90
Pasture4C1	DREC4C1	2014	0	CON	100	0	0	0	110
Pasture4C1	DREC4C1	2014	0	CON	70	0	30	0	50
Pasture4C1	DREC4C1	2014	0	CON	60	0	40	0	95
Pasture4C1	DREC4C1	2014	0	CON	90	0	10	0	85
Pasture4C1	DREC4C1	2014	0	CON	80	0	20	0	55
Pasture4C1	DREC4C1	2014	0	CON	95	5	0	0	85
Pasture4C1	DREC4C1	2014	0	CON	80	0	20	0	70
Pasture4C1	DREC4C1	2014	0	CON	80	0	15	5	50
Pasture4C1	DREC4C1	2014	0	CON	95	0	5	0	70
Pasture4C1	DREC4C1	2014	0	CON	50	0	50	0	50
Pasture4C1	DREC4C1	2014	0	CON	55	0	40	5	55
Pasture4C1	DREC4C1	2014	0	CON	70	0	10	20	90
Pasture4C1	DREC4C1	2014	0	CON	50	0	50	0	50

## Sheet: FISP2015
ID	Pasture	Year	use	TRT	Grass	Forb	Lit	BG	SubHgt
/*FISP03(2015_BGAD)*/	BGAD5A2	2015	1	PBG	30	48.75	10	0	40
/*FISP04*/	BGAD5A2	2015	1	ROT	56.25	10	33.75	0	10
/*FISP05*/	BGAD2A2	2015	1	ROT	77.5	0	22.5	0	40
/*FISP06*/	BGAD3A2	2015	1	ROT	27.5	62.5	2.5	0	90
/*FISP07*/	BGAD6A2	2015	1	PBG	27.5	45	27.5	0	130
/*FISP08*/	BGAD3A2	2015	1	PBG	32.5	22.5	15	20	80
/*FISP09*/	BGAD5A2	2015	1	ROT	16.25	73.75	2.5	7.5	100
/*FISP10*/	BGAD6B2	2015	1	PBG	57.5	21.25	8.75	3.75	80
/*FISP11*/	BGAD2A2	2015	1	ROT	55	25	20	0	70
/*FISP12*/	BGAD2B2	2015	1	ROT	42.5	37.5	5	7.5	80
/*FISP13*/	BGAD3B2	2015	1	PBG	26.25	23.75	27.5	3.75	80
/*FISP15*/	BGAD6B2	2015	1	PBG	52.5	35	15	0	50
/*FISP18*/	BGAD5B2	2015	1	ROT	20	42.5	0	0	65
/*FISP19*/	BGAD6C2	2015	1	PBG	42.5	10	27.5	0	70
/*FISP20*/	BGAD5B2	2015	1	ROT	42.5	2.5	55	0	70
/*FISP04(2015_DREC)*/	DREC3A2	2015	1	ROT	27.5	0	72.5	0	80
/*FISP05*/	DREC3A2	2015	1	ROT	28.75	0	71.25	0	40
/*FISP06*/	DREC3A2	2015	1	ROT	47.5	0	52.5	0	120
/*FISP07*/	DREC5A2	2015	1	ROT	51.25	0	48.75	0	110
/*FISP08*/	DREC3A2	2015	1	ROT	43.75	0	55	1.25	80
/*FISP09*/	DREC3A2	2015	1	PBG	17.5	0	80	2.5	100
/*FISP10*/	DREC4A2	2015	1	PBG	87.5	5	7.5	0	100
/*FISP11*/	DREC2A2	2015	1	PBG	68.75	0	31.25	0	80
/*FISP12*/	DREC4A2	2015	1	ROT	81.25	0	18.75	0	60
/*FISP13*/	DREC3A2	2015	1	PBG	30	0	70	0	110
/*FISP14*/	DREC3A2	2015	1	PBG	37.5	0	62.5	0	60
/*FISP16*/	DREC3A2	2015	1	PBG	60	40	0	0	100
/*FISP17*/	DREC3A2	2015	1	PBG	53.75	0	43.75	2.5	100
/*FISP18*/	DREC2A2	2015	1	PBG	45	2.5	52.5	0	105
/*FISP19*/	DREC3A2	2015	1	ROT	50	0	50	0	90
/*FISP20*/	DREC1A2	2015	1	PBG	15	0	83.75	1.25	100
/*FISP22*/	DREC3A2	2015	1	PBG	15	0	85	0	55
/*FISP24*/	DREC1A2	2015	1	PBG	17.5	1.25	68.75	12.5	85
/*FISP26*/	DREC3A2	2015	1	ROT	58.75	0	41.25	0	85
/*FISP27*/	DREC3A2	2015	1	ROT	35	0	65	0	110
/*FISP30*/	DREC2A2	2015	1	PBG	35	0	65	0	150
/*FISP37*/	DREC3A2	2015	1	ROT	80	10	10	0	170
/*FISP41*/	DREC1B2	2015	1	ROT	52.5	0	17.5	30	110
/*FISP42*/	DREC4B2	2015	1	ROT	65	1.25	16.25	17.5	60
/*FISP43*/	DREC3B2	2015	1	PBG	5	0	95	0	70
/*FISP44*/	DREC3B2	2015	1	PBG	15	0	81.25	3.75	80
/*FISP45*/	DREC3B2	2015	1	PBG	55	2.5	42.5	0	60
/*FISP46*/	DREC4B2	2015	1	PBG	23.75	13.75	62.5	0	160
/*FISP47*/	DREC3B2	2015	1	ROT	15	0	81.25	3.75	120
/*FISP48*/	DREC3B2	2015	1	PBG	70	0	30	0	90
/*FISP50*/	DREC3B2	2015	1	PBG	47.5	0	50	2.5	95
/*FISP51*/	DREC4B2	2015	1	PBG	51.25	1.25	47.5	0	40
/*FISP54*/	DREC1B2	2015	1	PBG	5	5	85	5	60
/*FISP55*/	DREC3B2	2015	1	ROT	68.75	0	31.25	0	80
/*FISP56*/	DREC4B2	2015	1	PBG	22.5	0	77.5	0	100
/*FISP57*/	DREC3B2	2015	1	PBG	56.875	0	43.125	0	90
/*FISP60*/	DREC3C2	2015	1	PBG	85	0	15	0	115
/*FISP61*/	DREC4C2	2015	1	PBG	37.5	0	0	62.5	55
/*FISP01(2015_QUICK)*/	QUICK2A2	2015	1	ROT	71.25	1.25	27.5	0	75
/*FISP02*/	QUICK1A2	2015	1	PBG	46.25	6.25	46.25	1.25	40
/*FISP03*/	QUICK3A2	2015	1	PBG	62.5	20	16.25	0	80
/*FISP04*/	QUICK4A2	2015	1	ROT	53.75	31.25	6.25	0	130
/*FISP05*/	QUICK2A2	2015	1	ROT	58.75	0	41.25	0	100
/*FISP06*/	QUICK4A2	2015	1	ROT	6.25	53.75	7.5	0	160
/*FISP07*/	QUICK3A2	2015	1	PBG	36.25	43.75	5	3.75	123
/*FISP08*/	QUICK4B2	2015	1	ROT	26.25	42.5	10	0	103
/*FISP09*/	QUICK1B2	2015	1	PBG	91.25	0	2.5	5	130
/*FISP10*/	QUICK4B2	2015	1	ROT	62.5	0	17.5	5	130
/*FISP11*/	QUICK3B2	2015	1	PBG	46.25	0	7.5	7.5	152
/*FISP12*/	QUICK1B2	2015	1	PBG	21.25	11.25	1.25	2.5	245
/*FISP13*/	QUICK3C2	2015	1	PBG	83.75	0	0	0	92
Pasture3A2	BGAD3A2	2015	0	PB	20	5	75	0	0
Pasture3A2	BGAD3A2	2015	0	PB	60	0	40	0	40
Pasture3A2	BGAD3A2	2015	0	PB	60	5	40	0	30
Pasture3A2	BGAD3A2	2015	0	PB	70	5	30	0	40
Pasture3A2	BGAD3A2	2015	0	PB	80	0	40	0	30
Pasture3A2	BGAD3A2	2015	0	PB	50	5	40	5	0
Pasture3A2	BGAD3A2	2015	0	PB	10	40	50	0	10
Pasture3A2	BGAD3A2	2015	0	PB	5	30	65	0	30
Pasture3A2	BGAD3A2	2015	0	PB	70	0	30	0	30
Pasture3A2	BGAD3A2	2015	0	PB	85	0	15	0	30
Pasture3A2	BGAD3A2	2015	0	PB	95	0	5	0	40
Pasture3A2	BGAD3A2	2015	0	PB	85	10	5	0	50
Pasture3A2	BGAD3A2	2015	0	PB	50	0	50	0	5
Pasture3A2	BGAD3A2	2015	0	PB	55	30	15	0	60
Pasture3A2	BGAD3A2	2015	0	PB	15	15	70	0	20
Pasture3A2	BGAD3A2	2015	0	PB	50	10	40	0	40
Pasture3A2	BGAD3A2	2015	0	PB	60	30	10	0	60
Pasture3A2	BGAD3A2	2015	0	PB	100	0	0	0	40
Pasture3A2	BGAD3A2	2015	0	PB	50	30	20	0	40
Pasture3A2	BGAD3A2	2015	0	PB	35	30	35	0	40
Pasture3A2	BGAD3A2	2015	0	PB	60	10	30	0	30
Pasture3A2	BGAD3A2	2015	0	PB	70	20	10	0	60
Pasture3A2	BGAD3A2	2015	0	PB	85	10	5	0	60
Pasture3A2	BGAD3A2	2015	0	PB	25	75	0	0	20
Pasture3A2	BGAD3A2	2015	0	PB	10	20	70	0	40
Pasture3A2	BGAD3A2	2015	0	PB	10	15	75	0	30
Pasture3A2	BGAD3A2	2015	0	PB	5	65	30	0	50
Pasture3A2	BGAD3A2	2015	0	PB	45	40	15	0	50
Pasture3A2	BGAD3A2	2015	0	PB	35	40	25	0	50
Pasture3A2	BGAD3A2	2015	0	PB	50	5	45	0	50
Pasture3A2	BGAD3A2	2015	0	PB	95	5	0	0	80
Pasture3A2	BGAD3A2	2015	0	PB	75	20	5	0	50
Pasture3A2	BGAD3A2	2015	0	PB	5	80	15	0	50
Pasture3A2	BGAD3A2	2015	0	PB	15	45	40	0	70
Pasture3A2	BGAD3A2	2015	0	PB	85	15	0	0	50
Pasture3A2	BGAD3A2	2015	0	PB	80	0	20	0	50
Pasture5A2	BGAD5A2	2015	0	ROT	90	0	10	0	20
Pasture5A2	BGAD5A2	2015	0	ROT	60	10	30	0	20
Pasture5A2	BGAD5A2	2015	0	ROT	30	5	65	0	20
Pasture5A2	BGAD5A2	2015	0	ROT	45	15	40	0	40
Pasture5A2	BGAD5A2	2015	0	ROT	80	0	20	0	40
Pasture5A2	BGAD5A2	2015	0	ROT	100	0	0	0	60
Pasture5A2	BGAD5A2	2015	0	ROT	70	10	20	0	20
Pasture5A2	BGAD5A2	2015	0	ROT	70	20	10	0	40
Pasture5A2	BGAD5A2	2015	0	ROT	5	70	20	0	30
Pasture5A2	BGAD5A2	2015	0	ROT	70	20	10	0	30
Pasture5A2	BGAD5A2	2015	0	ROT	70	20	10	0	30
Pasture5A2	BGAD5A2	2015	0	ROT	5	80	15	0	40
Pasture5A2	BGAD5A2	2015	0	ROT	0	0	0	100	0
Pasture5A2	BGAD5A2	2015	0	ROT	50	40	10	0	30
Pasture5A2	BGAD5A2	2015	0	ROT	20	0	80	0	10
Pasture5A2	BGAD5A2	2015	0	ROT	60	5	35	0	20
Pasture5A2	BGAD5A2	2015	0	ROT	60	20	20	0	20
Pasture5A2	BGAD5A2	2015	0	ROT	50	30	20	0	20
Pasture5A2	BGAD5A2	2015	0	ROT	50	0	50	0	40
Pasture5A2	BGAD5A2	2015	0	ROT	10	20	70	0	20
Pasture5A2	BGAD5A2	2015	0	ROT	35	50	15	0	30
Pasture5A2	BGAD5A2	2015	0	ROT	35	15	50	0	40
Pasture5A2	BGAD5A2	2015	0	ROT	10	60	20	0	0
Pasture5A2	BGAD5A2	2015	0	ROT	10	80	10	0	30
Pasture6A2	BGAD6A2	2015	0	PB	30	0	0	70	40
Pasture6A2	BGAD6A2	2015	0	PB	25	5	0	70	0
Pasture6A2	BGAD6A2	2015	0	PB	20	20	0	60	30
Pasture6A2	BGAD6A2	2015	0	PB	20	20	0	60	30
Pasture6A2	BGAD6A2	2015	0	PB	45	5	0	50	20
Pasture6A2	BGAD6A2	2015	0	PB	50	20	0	30	10
Pasture6A2	BGAD6A2	2015	0	PB	70	15	15	0	20
Pasture6A2	BGAD6A2	2015	0	PB	15	55	10	20	30
Pasture6A2	BGAD6A2	2015	0	PB	20	20	60	0	20
Pasture6A2	BGAD6A2	2015	0	PB	35	15	35	15	40
Pasture6A2	BGAD6A2	2015	0	PB	20	10	70	0	30
Pasture6A2	BGAD6A2	2015	0	PB	5	5	95	0	20
Pasture6A2	BGAD6A2	2015	0	PB	100	0	0	0	50
Pasture6A2	BGAD6A2	2015	0	PB	60	0	40	0	50
Pasture6A2	BGAD6A2	2015	0	PB	80	5	15	0	40
Pasture6A2	BGAD6A2	2015	0	PB	10	15	75	0	40
Pasture6A2	BGAD6A2	2015	0	PB	90	0	10	0	40
Pasture6A2	BGAD6A2	2015	0	PB	25	25	50	0	30
Pasture6A2	BGAD6A2	2015	0	PB	50	0	0	50	20
Pasture6A2	BGAD6A2	2015	0	PB	50	0	0	50	20
Pasture6A2	BGAD6A2	2015	0	PB	50	0	30	20	30
Pasture6A2	BGAD6A2	2015	0	PB	45	5	10	40	40
Pasture6A2	BGAD6A2	2015	0	PB	30	0	70	0	10
Pasture6A2	BGAD6A2	2015	0	PB	60	0	20	20	10
Pasture6A2	BGAD6A2	2015	0	PB	15	5	80	0	20
Pasture6A2	BGAD6A2	2015	0	PB	5	15	80	0	30
Pasture6A2	BGAD6A2	2015	0	PB	0	5	95	0	20
Pasture6A2	BGAD6A2	2015	0	PB	5	5	70	20	5
Pasture6A2	BGAD6A2	2015	0	PB	5	15	80	0	0
Pasture6A2	BGAD6A2	2015	0	PB	40	0	60	0	20
Pasture2A2	BGAD2A2	2015	0	ROT	0	0	100	0	0
Pasture2A2	BGAD2A2	2015	0	ROT	50	0	50	0	30
Pasture2A2	BGAD2A2	2015	0	ROT	60	5	35	0	40
Pasture2A2	BGAD2A2	2015	0	ROT	50	0	50	0	50
Pasture2A2	BGAD2A2	2015	0	ROT	90	0	10	0	50
Pasture2A2	BGAD2A2	2015	0	ROT	85	0	15	0	50
Pasture2A2	BGAD2A2	2015	0	PB	10	0	90	0	10
Pasture2A2	BGAD2A2	2015	0	PB	30	5	60	5	0
Pasture2A2	BGAD2A2	2015	0	PB	15	15	70	0	10
Pasture2A2	BGAD2A2	2015	0	PB	0	10	90	0	40
Pasture2A2	BGAD2A2	2015	0	PB	0	10	90	0	10
Pasture2A2	BGAD2A2	2015	0	PB	50	30	20	0	40
Pasture2A2	BGAD2A2	2015	0	ROT	5	5	70	20	0
Pasture2A2	BGAD2A2	2015	0	ROT	40	15	45	0	30
Pasture2A2	BGAD2A2	2015	0	ROT	60	10	30	0	40
Pasture2A2	BGAD2A2	2015	0	ROT	60	0	40	0	30
Pasture2A2	BGAD2A2	2015	0	ROT	50	0	50	0	50
Pasture2A2	BGAD2A2	2015	0	ROT	20	60	20	0	40
Pasture2A2	BGAD2A2	2015	0	ROT	70	0	30	0	20
Pasture2A2	BGAD2A2	2015	0	ROT	80	0	20	0	30
Pasture2A2	BGAD2A2	2015	0	ROT	75	0	25	0	40
Pasture2A2	BGAD2A2	2015	0	ROT	50	0	50	0	30
Pasture2A2	BGAD2A2	2015	0	ROT	50	0	50	0	30
Pasture2A2	BGAD2A2	2015	0	ROT	80	10	10	0	40
Pasture2A2	BGAD2A2	2015	0	ROT	30	20	50	0	30
Pasture2A2	BGAD2A2	2015	0	ROT	20	50	30	0	30
Pasture2A2	BGAD2A2	2015	0	ROT	60	30	10	0	30
Pasture2A2	BGAD2A2	2015	0	ROT	20	50	30	0	40
Pasture2A2	BGAD2A2	2015	0	ROT	20	80	0	0	40
Pasture2A2	BGAD2A2	2015	0	ROT	30	50	20	0	30
Pasture2A2	BGAD2A2	2015	0	ROT	80	0	20	0	30
Pasture2A2	BGAD2A2	2015	0	ROT	20	0	80	0	0
Pasture2A2	BGAD2A2	2015	0	ROT	80	0	20	0	40
Pasture2A2	BGAD2A2	2015	0	ROT	40	40	20	0	40
Pasture2A2	BGAD2A2	2015	0	ROT	80	0	20	0	40
Pasture2A2	BGAD2A2	2015	0	ROT	90	0	10	0	20
Pasture2B2	BGAD2B2	2015	0	ROT	5	0	95	0	0
Pasture2B2	BGAD2B2	2015	0	ROT	10	0	90	0	0
Pasture2B2	BGAD2B2	2015	0	ROT	5	0	95	0	0
Pasture2B2	BGAD2B2	2015	0	ROT	20	0	80	0	0
Pasture2B2	BGAD2B2	2015	0	ROT	5	0	95	0	0
Pasture2B2	BGAD2B2	2015	0	ROT	10	0	90	0	0
Pasture2B2	BGAD2B2	2015	0	ROT	15	0	85	0	10
Pasture2B2	BGAD2B2	2015	0	ROT	10	0	90	0	10
Pasture2B2	BGAD2B2	2015	0	ROT	30	0	70	0	0
Pasture2B2	BGAD2B2	2015	0	ROT	30	0	70	0	0
Pasture2B2	BGAD2B2	2015	0	ROT	50	0	25	25	20
Pasture2B2	BGAD2B2	2015	0	ROT	75	5	20	0	30
Pasture2B2	BGAD2B2	2015	0	ROT	30	0	70	0	10
Pasture2B2	BGAD2B2	2015	0	ROT	5	0	95	0	0
Pasture2B2	BGAD2B2	2015	0	ROT	5	0	95	0	10
Pasture2B2	BGAD2B2	2015	0	ROT	10	0	90	0	20
Pasture2B2	BGAD2B2	2015	0	ROT	70	5	25	0	50
Pasture2B2	BGAD2B2	2015	0	ROT	0	0	100	0	0
Pasture2B2	BGAD2B2	2015	0	ROT	60	10	30	0	20
Pasture2B2	BGAD2B2	2015	0	ROT	65	20	15	0	30
Pasture2B2	BGAD2B2	2015	0	ROT	20	50	30	0	30
Pasture2B2	BGAD2B2	2015	0	ROT	25	50	25	0	50
Pasture2B2	BGAD2B2	2015	0	ROT	20	0	80	0	30
Pasture2B2	BGAD2B2	2015	0	ROT	50	0	50	0	40
Pasture2B2	BGAD2B2	2015	0	ROT	90	0	10	0	20
Pasture2B2	BGAD2B2	2015	0	ROT	50	0	50	0	30
Pasture2B2	BGAD2B2	2015	0	ROT	75	0	25	0	20
Pasture2B2	BGAD2B2	2015	0	ROT	55	5	30	0	20
Pasture2B2	BGAD2B2	2015	0	ROT	90	10	5	0	70
Pasture2B2	BGAD2B2	2015	0	ROT	85	0	15	0	60
Pasture2B2	BGAD2B2	2015	0	ROT	15	80	5	0	70
Pasture2B2	BGAD2B2	2015	0	ROT	5	50	45	0	40
Pasture2B2	BGAD2B2	2015	0	ROT	85	10	5	0	70
Pasture2B2	BGAD2B2	2015	0	ROT	50	10	40	0	30
Pasture2B2	BGAD2B2	2015	0	ROT	60	40	0	0	50
Pasture2B2	BGAD2B2	2015	0	ROT	10	55	35	0	70
Pasture5B2	BGAD5B2	2015	0	ROT	20	15	65	0	40
Pasture5B2	BGAD5B2	2015	0	ROT	20	20	60	0	40
Pasture5B2	BGAD5B2	2015	0	ROT	50	40	10	0	30
Pasture5B2	BGAD5B2	2015	0	ROT	65	20	15	0	40
Pasture5B2	BGAD5B2	2015	0	ROT	75	5	20	0	40
Pasture5B2	BGAD5B2	2015	0	ROT	50	25	25	0	30
Pasture5B2	BGAD5B2	2015	0	ROT	5	0	95	0	20
Pasture5B2	BGAD5B2	2015	0	ROT	15	0	85	0	10
Pasture5B2	BGAD5B2	2015	0	ROT	20	20	60	0	40
Pasture5B2	BGAD5B2	2015	0	ROT	30	0	50	0	30
Pasture5B2	BGAD5B2	2015	0	ROT	25	25	50	0	40
Pasture5B2	BGAD5B2	2015	0	ROT	25	10	65	0	30
Pasture5B2	BGAD5B2	2015	0	ROT	75	20	15	0	50
Pasture5B2	BGAD5B2	2015	0	ROT	30	30	40	0	20
Pasture5B2	BGAD5B2	2015	0	ROT	55	15	40	0	30
Pasture5B2	BGAD5B2	2015	0	ROT	25	15	60	0	20
Pasture5B2	BGAD5B2	2015	0	ROT	20	0	80	0	10
Pasture5B2	BGAD5B2	2015	0	ROT	25	45	30	0	10
Pasture5B2	BGAD5B2	2015	0	ROT	0	0	100	0	0
Pasture5B2	BGAD5B2	2015	0	ROT	5	5	90	0	10
Pasture5B2	BGAD5B2	2015	0	ROT	60	30	10	0	30
Pasture5B2	BGAD5B2	2015	0	ROT	40	20	40	0	20
Pasture5B2	BGAD5B2	2015	0	ROT	20	30	50	0	30
Pasture5B2	BGAD5B2	2015	0	ROT	40	20	40	0	20
Pasture6B2	BGAD6B2	2015	0	PB	60	10	30	0	30
Pasture6B2	BGAD6B2	2015	0	PB	50	15	35	0	50
Pasture6B2	BGAD6B2	2015	0	PB	50	5	45	0	20
Pasture6B2	BGAD6B2	2015	0	PB	15	5	80	0	0
Pasture6B2	BGAD6B2	2015	0	PB	60	0	40	0	10
Pasture6B2	BGAD6B2	2015	0	PB	25	50	25	0	40
Pasture6B2	BGAD6B2	2015	0	PB	50	0	10	40	0
Pasture6B2	BGAD6B2	2015	0	PB	65	5	0	30	20
Pasture6B2	BGAD6B2	2015	0	PB	60	10	0	30	30
Pasture6B2	BGAD6B2	2015	0	PB	40	0	0	60	10
Pasture6B2	BGAD6B2	2015	0	PB	25	25	0	50	30
Pasture6B2	BGAD6B2	2015	0	PB	20	5	0	75	10
Pasture6B2	BGAD6B2	2015	0	PB	45	50	5	0	40
Pasture6B2	BGAD6B2	2015	0	PB	20	50	30	0	50
Pasture6B2	BGAD6B2	2015	0	PB	50	25	25	0	50
Pasture6B2	BGAD6B2	2015	0	PB	30	30	40	0	40
Pasture6B2	BGAD6B2	2015	0	PB	25	35	40	0	20
Pasture6B2	BGAD6B2	2015	0	PB	30	40	30	0	60
Pasture6B2	BGAD6B2	2015	0	PB	90	0	10	0	40
Pasture6B2	BGAD6B2	2015	0	PB	65	25	10	0	50
Pasture6B2	BGAD6B2	2015	0	PB	50	50	50	0	40
Pasture6B2	BGAD6B2	2015	0	PB	40	30	30	0	40
Pasture6B2	BGAD6B2	2015	0	PB	60	40	0	0	30
Pasture6B2	BGAD6B2	2015	0	PB	40	20	40	0	20
Pasture6B2	BGAD6B2	2015	0	PB	60	30	0	10	30
Pasture6B2	BGAD6B2	2015	0	PB	65	5	0	30	20
Pasture6B2	BGAD6B2	2015	0	PB	0	40	0	60	40
Pasture6B2	BGAD6B2	2015	0	PB	15	50	0	35	50
Pasture6B2	BGAD6B2	2015	0	PB	0	25	75	0	10
Pasture6B2	BGAD6B2	2015	0	PB	5	15	80	0	0
Pasture3B2	BGAD3B2	2015	0	PB	35	0	65	0	10
Pasture3B2	BGAD3B2	2015	0	PB	75	0	25	0	10
Pasture3B2	BGAD3B2	2015	0	PB	75	5	20	0	20
Pasture3B2	BGAD3B2	2015	0	PB	40	0	60	0	20
Pasture3B2	BGAD3B2	2015	0	PB	65	15	20	0	30
Pasture3B2	BGAD3B2	2015	0	PB	80	5	15	0	20
Pasture3B2	BGAD3B2	2015	0	PB	15	0	85	0	0
Pasture3B2	BGAD3B2	2015	0	PB	20	20	60	0	20
Pasture3B2	BGAD3B2	2015	0	PB	80	0	20	0	10
Pasture3B2	BGAD3B2	2015	0	PB	65	15	25	0	10
Pasture3B2	BGAD3B2	2015	0	PB	40	5	50	0	20
Pasture3B2	BGAD3B2	2015	0	PB	70	0	30	0	70
Pasture3B2	BGAD3B2	2015	0	PB	25	5	70	0	0
Pasture3B2	BGAD3B2	2015	0	PB	15	15	70	0	0
Pasture3B2	BGAD3B2	2015	0	PB	60	20	20	0	50
Pasture3B2	BGAD3B2	2015	0	PB	85	5	10	0	30
Pasture3B2	BGAD3B2	2015	0	PB	15	5	80	0	10
Pasture3B2	BGAD3B2	2015	0	PB	10	90	0	0	10
Pasture3B2	BGAD3B2	2015	0	PB	20	20	60	0	10
Pasture3B2	BGAD3B2	2015	0	PB	40	60	10	0	80
Pasture3B2	BGAD3B2	2015	0	PB	30	60	10	0	70
Pasture3B2	BGAD3B2	2015	0	PB	0	0	100	0	40
Pasture3B2	BGAD3B2	2015	0	PB	40	10	50	0	10
Pasture3B2	BGAD3B2	2015	0	PB	50	40	10	0	30
Pasture3B2	BGAD3B2	2015	0	PB	25	5	60	0	20
Pasture3B2	BGAD3B2	2015	0	PB	30	10	60	0	10
Pasture3B2	BGAD3B2	2015	0	PB	50	0	40	0	10
Pasture3B2	BGAD3B2	2015	0	PB	60	0	40	0	30
Pasture3B2	BGAD3B2	2015	0	PB	35	5	60	0	30
Pasture3B2	BGAD3B2	2015	0	PB	60	20	20	0	20
Pasture3B2	BGAD3B2	2015	0	PB	70	30	0	0	60
Pasture3B2	BGAD3B2	2015	0	PB	10	70	15	0	140
Pasture3B2	BGAD3B2	2015	0	PB	35	25	30	0	20
Pasture3B2	BGAD3B2	2015	0	PB	60	40	0	0	50
Pasture3B2	BGAD3B2	2015	0	PB	25	65	10	0	20
Pasture3B2	BGAD3B2	2015	0	PB	85	0	15	0	10
Pasture6C2	BGAD6C2	2015	0	PB	20	0	80	0	10
Pasture6C2	BGAD6C2	2015	0	PB	15	0	75	10	10
Pasture6C2	BGAD6C2	2015	0	PB	25	0	75	0	15
Pasture6C2	BGAD6C2	2015	0	PB	20	0	80	0	20
Pasture6C2	BGAD6C2	2015	0	PB	50	0	50	0	20
Pasture6C2	BGAD6C2	2015	0	PB	20	0	25	5	30
Pasture6C2	BGAD6C2	2015	0	PB	75	15	0	10	20
Pasture6C2	BGAD6C2	2015	0	PB	55	10	10	25	15
Pasture6C2	BGAD6C2	2015	0	PB	75	15	0	10	45
Pasture6C2	BGAD6C2	2015	0	PB	30	60	0	10	55
Pasture6C2	BGAD6C2	2015	0	PB	40	40	20	0	20
Pasture6C2	BGAD6C2	2015	0	PB	60	20	0	20	10
Pasture6C2	BGAD6C2	2015	0	PB	80	20	0	0	45
Pasture6C2	BGAD6C2	2015	0	PB	25	65	10	0	50
Pasture6C2	BGAD6C2	2015	0	PB	15	75	10	0	70
Pasture6C2	BGAD6C2	2015	0	PB	70	15	15	0	20
Pasture6C2	BGAD6C2	2015	0	PB	90	5	5	0	30
Pasture6C2	BGAD6C2	2015	0	PB	75	15	10	0	75
Pasture6C2	BGAD6C2	2015	0	PB	80	20	0	0	40
Pasture6C2	BGAD6C2	2015	0	PB	100	0	0	0	30
Pasture6C2	BGAD6C2	2015	0	PB	95	5	0	0	40
Pasture6C2	BGAD6C2	2015	0	PB	70	20	10	0	35
Pasture6C2	BGAD6C2	2015	0	PB	50	0	0	50	60
Pasture6C2	BGAD6C2	2015	0	PB	60	25	10	5	50
Pasture6C2	BGAD6C2	2015	0	PB	40	5	5	50	35
Pasture6C2	BGAD6C2	2015	0	PB	80	10	0	10	20
Pasture6C2	BGAD6C2	2015	0	PB	70	0	0	30	20
Pasture6C2	BGAD6C2	2015	0	PB	75	0	5	20	10
Pasture6C2	BGAD6C2	2015	0	PB	75	0	5	20	15
Pasture6C2	BGAD6C2	2015	0	PB	70	0	30	0	20
Pasture1A2	DREC1A2	2015	0	RG	10	0	90	0	30
Pasture1A2	DREC1A2	2015	0	RG	90	0	10	0	80
Pasture1A2	DREC1A2	2015	0	RG	55	0	45	0	65
Pasture1A2	DREC1A2	2015	0	RG	15	10	75	0	60
Pasture1A2	DREC1A2	2015	0	RG	90	0	10	0	55
Pasture1A2	DREC1A2	2015	0	RG	10	0	90	0	45
Pasture1A2	DREC1A2	2015	0	RG	5	0	95	0	70
Pasture1A2	DREC1A2	2015	0	RG	25	0	75	0	40
Pasture1A2	DREC1A2	2015	0	RG	15	0	85	0	45
Pasture1A2	DREC1A2	2015	0	RG	15	0	85	0	40
Pasture1A2	DREC1A2	2015	0	RG	20	0	80	0	60
Pasture1A2	DREC1A2	2015	0	RG	10	0	90	0	40
Pasture1A2	DREC1A2	2015	0	RG	95	0	5	0	40
Pasture1A2	DREC1A2	2015	0	RG	60	5	35	0	40
Pasture1A2	DREC1A2	2015	0	RG	0	0	50	50	20
Pasture1A2	DREC1A2	2015	0	RG	5	0	95	0	10
Pasture1A2	DREC1A2	2015	0	RG	90	0	10	0	60
Pasture1A2	DREC1A2	2015	0	RG	60	0	40	0	40
Pasture1A2	DREC1A2	2015	0	RG	75	0	25	0	45
Pasture1A2	DREC1A2	2015	0	RG	5	0	95	0	50
Pasture1A2	DREC1A2	2015	0	RG	75	0	25	0	60
Pasture1A2	DREC1A2	2015	0	RG	0	0	100	0	40
Pasture1A2	DREC1A2	2015	0	RG	10	0	90	0	25
Pasture1A2	DREC1A2	2015	0	RG	5	0	95	0	10
Pasture5A2	DREC5A2	2015	0	RG	5	5	90	0	60
Pasture5A2	DREC5A2	2015	0	RG	60	0	40	0	70
Pasture5A2	DREC5A2	2015	0	RG	70	0	30	0	65
Pasture5A2	DREC5A2	2015	0	RG	45	0	55	0	60
Pasture5A2	DREC5A2	2015	0	RG	60	0	40	0	70
Pasture5A2	DREC5A2	2015	0	RG	50	0	50	0	80
Pasture5A2	DREC5A2	2015	0	RG	20	0	80	0	60
Pasture5A2	DREC5A2	2015	0	RG	25	0	75	0	65
Pasture5A2	DREC5A2	2015	0	RG	25	0	75	0	55
Pasture5A2	DREC5A2	2015	0	RG	45	0	55	0	90
Pasture5A2	DREC5A2	2015	0	RG	15	0	85	0	55
Pasture5A2	DREC5A2	2015	0	RG	45	0	55	0	60
Pasture5A2	DREC5A2	2015	0	RG	40	0	60	0	40
Pasture5A2	DREC5A2	2015	0	RG	20	0	80	0	25
Pasture5A2	DREC5A2	2015	0	RG	70	0	30	0	45
Pasture5A2	DREC5A2	2015	0	RG	50	0	50	0	50
Pasture5A2	DREC5A2	2015	0	RG	35	0	65	0	60
Pasture5A2	DREC5A2	2015	0	RG	45	0	55	0	40
Pasture5A2	DREC5A2	2015	0	RG	5	0	95	0	15
Pasture5A2	DREC5A2	2015	0	RG	45	0	55	0	30
Pasture5A2	DREC5A2	2015	0	RG	30	0	70	0	35
Pasture5A2	DREC5A2	2015	0	RG	15	0	85	0	50
Pasture5A2	DREC5A2	2015	0	RG	20	0	80	0	40
Pasture5A2	DREC5A2	2015	0	RG	20	0	80	0	35
Pasture4A2	DREC4A2	2015	0	PBG	45	5	0	50	40
Pasture4A2	DREC4A2	2015	0	PBG	90	0	0	0	50
Pasture4A2	DREC4A2	2015	0	PBG	50	0	0	50	40
Pasture4A2	DREC4A2	2015	0	PBG	60	0	0	40	30
Pasture4A2	DREC4A2	2015	0	PBG	35	0	0	65	15
Pasture4A2	DREC4A2	2015	0	PBG	30	0	0	70	25
Pasture4A2	DREC4A2	2015	0	PBG	45	0	55	0	50
Pasture4A2	DREC4A2	2015	0	PBG	5	0	95	0	45
Pasture4A2	DREC4A2	2015	0	PBG	65	0	35	0	40
Pasture4A2	DREC4A2	2015	0	PBG	30	0	70	0	50
Pasture4A2	DREC4A2	2015	0	PBG	40	0	60	0	45
Pasture4A2	DREC4A2	2015	0	PBG	45	0	50	0	60
Pasture4A2	DREC4A2	2015	0	PBG	15	0	85	0	20
Pasture4A2	DREC4A2	2015	0	PBG	15	0	85	0	45
Pasture4A2	DREC4A2	2015	0	PBG	60	0	40	0	75
Pasture4A2	DREC4A2	2015	0	PBG	20	0	80	0	60
Pasture4A2	DREC4A2	2015	0	PBG	15	0	85	0	65
Pasture4A2	DREC4A2	2015	0	PBG	75	0	25	0	70
Pasture4A2	DREC4A2	2015	0	PBG	5	0	95	0	35
Pasture4A2	DREC4A2	2015	0	PBG	25	0	75	0	35
Pasture4A2	DREC4A2	2015	0	PBG	5	0	95	0	40
Pasture4A2	DREC4A2	2015	0	PBG	55	0	45	0	70
Pasture4A2	DREC4A2	2015	0	PBG	80	0	20	0	5
Pasture4A2	DREC4A2	2015	0	PBG	15	0	85	0	25
Pasture3A2	DREC3A2	2015	0	PBG	0	20	0	80	0
Pasture3A2	DREC3A2	2015	0	PBG	5	20	0	75	0
Pasture3A2	DREC3A2	2015	0	PBG	20	10	0	70	20
Pasture3A2	DREC3A2	2015	0	PBG	30	0	10	60	20
Pasture3A2	DREC3A2	2015	0	PBG	20	0	0	80	20
Pasture3A2	DREC3A2	2015	0	PBG	20	10	0	70	25
Pasture3A2	DREC3A2	2015	0	PBG	95	0	0	5	40
Pasture3A2	DREC3A2	2015	0	PBG	40	0	0	60	30
Pasture3A2	DREC3A2	2015	0	PBG	45	5	0	50	30
Pasture3A2	DREC3A2	2015	0	PBG	80	0	0	20	45
Pasture3A2	DREC3A2	2015	0	PBG	60	10	0	30	25
Pasture3A2	DREC3A2	2015	0	PBG	90	0	0	10	40
Pasture3A2	DREC3A2	2015	0	PBG	40	0	60	0	40
Pasture3A2	DREC3A2	2015	0	PBG	20	0	80	0	30
Pasture3A2	DREC3A2	2015	0	PBG	10	0	90	0	20
Pasture3A2	DREC3A2	2015	0	PBG	90	0	10	0	55
Pasture3A2	DREC3A2	2015	0	PBG	80	0	40	0	40
Pasture3A2	DREC3A2	2015	0	PBG	60	0	40	0	50
Pasture3A2	DREC3A2	2015	0	PBG	50	0	50	0	40
Pasture3A2	DREC3A2	2015	0	PBG	0	5	95	0	0
Pasture3A2	DREC3A2	2015	0	PBG	60	0	40	0	30
Pasture3A2	DREC3A2	2015	0	PBG	90	0	10	0	60
Pasture3A2	DREC3A2	2015	0	PBG	80	0	20	0	25
Pasture3A2	DREC3A2	2015	0	PBG	5	0	95	0	20
Pasture1B2	DREC1B2	2015	0	RG	70	0	30	0	70
Pasture1B2	DREC1B2	2015	0	RG	70	0	30	0	60
Pasture1B2	DREC1B2	2015	0	RG	80	0	0	20	65
Pasture1B2	DREC1B2	2015	0	RG	20	0	80	0	40
Pasture1B2	DREC1B2	2015	0	RG	60	0	40	0	50
Pasture1B2	DREC1B2	2015	0	RG	50	0	50	0	45
Pasture1B2	DREC1B2	2015	0	RG	60	5	35	0	45
Pasture1B2	DREC1B2	2015	0	RG	70	0	25	5	55
Pasture1B2	DREC1B2	2015	0	RG	70	0	30	0	35
Pasture1B2	DREC1B2	2015	0	RG	20	0	70	10	40
Pasture1B2	DREC1B2	2015	0	RG	10	60	20	10	25
Pasture1B2	DREC1B2	2015	0	RG	95	0	5	0	65
Pasture1B2	DREC1B2	2015	0	RG	80	0	20	0	60
Pasture1B2	DREC1B2	2015	0	RG	60	0	40	0	55
Pasture1B2	DREC1B2	2015	0	RG	50	0	50	0	40
Pasture1B2	DREC1B2	2015	0	RG	40	0	60	0	50
Pasture1B2	DREC1B2	2015	0	RG	70	0	30	0	65
Pasture1B2	DREC1B2	2015	0	RG	80	0	20	0	70
Pasture1B2	DREC1B2	2015	0	RG	60	0	40	0	35
Pasture1B2	DREC1B2	2015	0	RG	90	0	10	0	45
Pasture1B2	DREC1B2	2015	0	RG	80	0	20	0	60
Pasture1B2	DREC1B2	2015	0	RG	80	0	20	0	75
Pasture1B2	DREC1B2	2015	0	RG	20	0	80	0	10
Pasture1B2	DREC1B2	2015	0	RG	40	0	60	0	30
Pasture3B2	DREC3B2	2015	0	PBG	20	0	0	80	35
Pasture3B2	DREC3B2	2015	0	PBG	40	0	40	20	25
Pasture3B2	DREC3B2	2015	0	PBG	85	0	0	15	60
Pasture3B2	DREC3B2	2015	0	PBG	40	10	0	50	30
Pasture3B2	DREC3B2	2015	0	PBG	75	5	0	20	20
Pasture3B2	DREC3B2	2015	0	PBG	85	0	0	15	90
Pasture3B2	DREC3B2	2015	0	PBG	90	0	0	10	60
Pasture3B2	DREC3B2	2015	0	PBG	30	0	0	70	45
Pasture3B2	DREC3B2	2015	0	PBG	25	0	0	75	30
Pasture3B2	DREC3B2	2015	0	PBG	50	0	0	50	65
Pasture3B2	DREC3B2	2015	0	PBG	40	0	0	60	60
Pasture3B2	DREC3B2	2015	0	PBG	30	10	0	60	40
Pasture3B2	DREC3B2	2015	0	PBG	60	0	40	0	55
Pasture3B2	DREC3B2	2015	0	PBG	20	0	80	0	20
Pasture3B2	DREC3B2	2015	0	PBG	35	0	65	0	40
Pasture3B2	DREC3B2	2015	0	PBG	20	0	80	0	25
Pasture3B2	DREC3B2	2015	0	PBG	60	0	40	0	60
Pasture3B2	DREC3B2	2015	0	PBG	50	0	50	0	50
Pasture3B2	DREC3B2	2015	0	PBG	40	0	60	0	15
Pasture3B2	DREC3B2	2015	0	PBG	20	0	60	20	10
Pasture3B2	DREC3B2	2015	0	PBG	90	0	10	0	30
Pasture3B2	DREC3B2	2015	0	PBG	10	10	40	40	10
Pasture3B2	DREC3B2	2015	0	PBG	5	0	95	0	10
Pasture3B2	DREC3B2	2015	0	PBG	20	0	80	0	20
Pasture4B2	DREC4B2	2015	0	PBG	60	5	0	35	15
Pasture4B2	DREC4B2	2015	0	PBG	75	0	25	0	20
Pasture4B2	DREC4B2	2015	0	PBG	70	15	5	10	5
Pasture4B2	DREC4B2	2015	0	PBG	65	5	5	25	10
Pasture4B2	DREC4B2	2015	0	PBG	30	0	0	70	5
Pasture4B2	DREC4B2	2015	0	PBG	45	0	0	55	25
Pasture4B2	DREC4B2	2015	0	PBG	70	0	30	0	50
Pasture4B2	DREC4B2	2015	0	PBG	80	0	20	0	55
Pasture4B2	DREC4B2	2015	0	PBG	0	0	85	15	0
Pasture4B2	DREC4B2	2015	0	PBG	50	0	50	0	40
Pasture4B2	DREC4B2	2015	0	PBG	65	0	35	0	80
Pasture4B2	DREC4B2	2015	0	PBG	35	0	65	0	40
Pasture4B2	DREC4B2	2015	0	PBG	80	0	20	0	40
Pasture4B2	DREC4B2	2015	0	PBG	60	0	40	0	85
Pasture4B2	DREC4B2	2015	0	PBG	40	0	60	0	75
Pasture4B2	DREC4B2	2015	0	PBG	30	0	70	0	20
Pasture4B2	DREC4B2	2015	0	PBG	20	0	80	0	80
Pasture4B2	DREC4B2	2015	0	PBG	80	0	20	0	75
Pasture4B2	DREC4B2	2015	0	PBG	55	0	45	0	40
Pasture4B2	DREC4B2	2015	0	PBG	30	5	65	0	60
Pasture4B2	DREC4B2	2015	0	PBG	30	0	70	0	70
Pasture4B2	DREC4B2	2015	0	PBG	40	0	60	0	20
Pasture4B2	DREC4B2	2015	0	PBG	50	0	50	0	100
Pasture4B2	DREC4B2	2015	0	PBG	70	0	30	0	60
Pasture3C2	DREC3C2	2015	0	PBG	85	0	0	15	70
Pasture3C2	DREC3C2	2015	0	PBG	20	20	0	60	30
Pasture3C2	DREC3C2	2015	0	PBG	75	0	0	25	25
Pasture3C2	DREC3C2	2015	0	PBG	25	0	0	75	20
Pasture3C2	DREC3C2	2015	0	PBG	75	0	0	25	40
Pasture3C2	DREC3C2	2015	0	PBG	60	5	0	35	25
Pasture3C2	DREC3C2	2015	0	PBG	75	0	0	25	75
Pasture3C2	DREC3C2	2015	0	PBG	85	0	0	15	60
Pasture3C2	DREC3C2	2015	0	PBG	50	0	0	50	45
Pasture3C2	DREC3C2	2015	0	PBG	90	0	0	10	40
Pasture3C2	DREC3C2	2015	0	PBG	100	0	0	0	60
Pasture3C2	DREC3C2	2015	0	PBG	100	0	0	0	90
Pasture3C2	DREC3C2	2015	0	PBG	65	0	35	0	80
Pasture3C2	DREC3C2	2015	0	PBG	65	0	35	0	80
Pasture3C2	DREC3C2	2015	0	PBG	90	0	0	10	60
Pasture3C2	DREC3C2	2015	0	PBG	80	0	0	20	10
Pasture3C2	DREC3C2	2015	0	PBG	75	0	25	0	70
Pasture3C2	DREC3C2	2015	0	PBG	95	0	5	0	30
Pasture3C2	DREC3C2	2015	0	PBG	40	0	60	0	10
Pasture3C2	DREC3C2	2015	0	PBG	70	0	30	0	20
Pasture3C2	DREC3C2	2015	0	PBG	15	0	85	0	20
Pasture3C2	DREC3C2	2015	0	PBG	85	0	15	0	20
Pasture3C2	DREC3C2	2015	0	PBG	10	0	90	0	30
Pasture3C2	DREC3C2	2015	0	PBG	0	0	100	0	0
Pasture4C2	DREC4C2	2015	0	PBG	25	0	0	75	20
Pasture4C2	DREC4C2	2015	0	PBG	35	15	0	50	30
Pasture4C2	DREC4C2	2015	0	PBG	50	15	0	35	15
Pasture4C2	DREC4C2	2015	0	PBG	35	5	0	60	10
Pasture4C2	DREC4C2	2015	0	PBG	95	0	0	5	45
Pasture4C2	DREC4C2	2015	0	PBG	35	10	0	55	5
Pasture4C2	DREC4C2	2015	0	PBG	20	0	0	80	10
Pasture4C2	DREC4C2	2015	0	PBG	15	0	85	0	30
Pasture4C2	DREC4C2	2015	0	PBG	85	0	15	0	60
Pasture4C2	DREC4C2	2015	0	PBG	35	0	0	65	15
Pasture4C2	DREC4C2	2015	0	PBG	100	0	0	0	70
Pasture4C2	DREC4C2	2015	0	PBG	50	0	50	0	20
Pasture4C2	DREC4C2	2015	0	PBG	35	0	65	0	10
Pasture4C2	DREC4C2	2015	0	PBG	50	0	50	0	80
Pasture4C2	DREC4C2	2015	0	PBG	5	0	95	0	5
Pasture4C2	DREC4C2	2015	0	PBG	55	0	45	0	70
Pasture4C2	DREC4C2	2015	0	PBG	85	0	15	0	75
Pasture4C2	DREC4C2	2015	0	PBG	15	0	85	0	20
Pasture4C2	DREC4C2	2015	0	PBG	10	10	80	0	25
Pasture4C2	DREC4C2	2015	0	PBG	95	0	5	0	85
Pasture4C2	DREC4C2	2015	0	PBG	35	0	65	0	20
Pasture4C2	DREC4C2	2015	0	PBG	20	0	80	0	30
Pasture4C2	DREC4C2	2015	0	PBG	55	0	45	0	70
Pasture4C2	DREC4C2	2015	0	PBG	75	0	25	0	60
Pasture4A2	QUICK4A2	2015	0	RG	35	40	20	5	12
Pasture4A2	QUICK4A2	2015	0	RG	15	10	75	0	15
Pasture4A2	QUICK4A2	2015	0	RG	10	50	40	0	25
Pasture4A2	QUICK4A2	2015	0	RG	15	15	40	30	15
Pasture4A2	QUICK4A2	2015	0	RG	10	35	5	50	12
Pasture4A2	QUICK4A2	2015	0	RG	40	40	5	15	15
Pasture4A2	QUICK4A2	2015	0	RG	50	0	50	0	6
Pasture4A2	QUICK4A2	2015	0	RG	65	10	20	5	11
Pasture4A2	QUICK4A2	2015	0	RG	10	40	50	0	7
Pasture4A2	QUICK4A2	2015	0	RG	45	50	5	0	5
Pasture4A2	QUICK4A2	2015	0	RG	50	5	45	0	16
Pasture4A2	QUICK4A2	2015	0	RG	70	5	25	0	12
Pasture4A2	QUICK4A2	2015	0	RG	55	30	10	5	25
Pasture4A2	QUICK4A2	2015	0	RG	20	45	35	0	15
Pasture4A2	QUICK4A2	2015	0	RG	65	10	5	20	20
Pasture4A2	QUICK4A2	2015	0	RG	10	20	5	65	10
Pasture4A2	QUICK4A2	2015	0	RG	50	5	5	40	15
Pasture4A2	QUICK4A2	2015	0	RG	15	25	0	60	22
Pasture4A2	QUICK4A2	2015	0	RG	65	5	25	5	20
Pasture4A2	QUICK4A2	2015	0	RG	20	5	0	75	0
Pasture4A2	QUICK4A2	2015	0	RG	70	0	30	0	30
Pasture4A2	QUICK4A2	2015	0	RG	50	35	15	0	23
Pasture4A2	QUICK4A2	2015	0	RG	90	0	10	0	21
Pasture4A2	QUICK4A2	2015	0	RG	25	25	45	5	14
Pasture3A2	QUICK3A2	2015	0	PB	10	5	80	5	10
Pasture3A2	QUICK3A2	2015	0	PB	5	10	85	0	4
Pasture3A2	QUICK3A2	2015	0	PB	50	5	45	0	13
Pasture3A2	QUICK3A2	2015	0	PB	40	0	60	0	15
Pasture3A2	QUICK3A2	2015	0	PB	40	0	60	0	15
Pasture3A2	QUICK3A2	2015	0	PB	25	5	65	5	9
Pasture3A2	QUICK3A2	2015	0	PB	10	10	40	40	11
Pasture3A2	QUICK3A2	2015	0	PB	10	20	65	5	4
Pasture3A2	QUICK3A2	2015	0	PB	40	0	55	5	7
Pasture3A2	QUICK3A2	2015	0	PB	40	5	10	45	7
Pasture3A2	QUICK3A2	2015	0	PB	30	5	25	40	8
Pasture3A2	QUICK3A2	2015	0	PB	50	0	10	40	24
Pasture3A2	QUICK3A2	2015	0	PB	65	0	20	15	6
Pasture3A2	QUICK3A2	2015	0	PB	15	10	5	70	11
Pasture3A2	QUICK3A2	2015	0	PB	70	0	15	15	8
Pasture3A2	QUICK3A2	2015	0	PB	50	0	30	20	14
Pasture3A2	QUICK3A2	2015	0	PB	20	0	40	40	9
Pasture3A2	QUICK3A2	2015	0	PB	30	0	30	40	12
Pasture3A2	QUICK3A2	2015	0	PB	20	10	65	5	4
Pasture3A2	QUICK3A2	2015	0	PB	15	60	20	5	7
Pasture3A2	QUICK3A2	2015	0	PB	45	0	55	0	17
Pasture3A2	QUICK3A2	2015	0	PB	20	5	75	0	11
Pasture3A2	QUICK3A2	2015	0	PB	50	0	50	0	17
Pasture3A2	QUICK3A2	2015	0	PB	60	5	35	0	27
Pasture3A2	QUICK3A2	2015	0	PB	30	30	40	0	22
Pasture3A2	QUICK3A2	2015	0	PB	60	15	25	0	19
Pasture3A2	QUICK3A2	2015	0	PB	25	60	15	0	22
Pasture3A2	QUICK3A2	2015	0	PB	65	25	10	0	22
Pasture3A2	QUICK3A2	2015	0	PB	35	20	40	0	10
Pasture3A2	QUICK3A2	2015	0	PB	20	5	45	0	5
Pasture1A2	QUICK1A2	2015	0	PB	15	0	40	45	3
Pasture1A2	QUICK1A2	2015	0	PB	15	0	40	45	2
Pasture1A2	QUICK1A2	2015	0	PB	40	0	10	50	12
Pasture1A2	QUICK1A2	2015	0	PB	15	0	5	80	3
Pasture1A2	QUICK1A2	2015	0	PB	20	0	60	20	3
Pasture1A2	QUICK1A2	2015	0	PB	20	5	10	65	6
Pasture1A2	QUICK1A2	2015	0	PB	45	5	50	0	21
Pasture1A2	QUICK1A2	2015	0	PB	30	5	65	0	11
Pasture1A2	QUICK1A2	2015	0	PB	40	0	60	0	24
Pasture1A2	QUICK1A2	2015	0	PB	90	0	10	0	5
Pasture1A2	QUICK1A2	2015	0	PB	40	5	55	0	27
Pasture1A2	QUICK1A2	2015	0	PB	25	5	70	0	18
Pasture1A2	QUICK1A2	2015	0	PB	20	5	75	0	8
Pasture1A2	QUICK1A2	2015	0	PB	30	30	10	30	18
Pasture1A2	QUICK1A2	2015	0	PB	70	20	10	0	29
Pasture1A2	QUICK1A2	2015	0	PB	10	5	10	75	0
Pasture1A2	QUICK1A2	2015	0	PB	10	5	5	80	0
Pasture1A2	QUICK1A2	2015	0	PB	50	5	15	30	13
Pasture1A2	QUICK1A2	2015	0	PB	50	25	25	0	13
Pasture1A2	QUICK1A2	2015	0	PB	5	40	55	0	9
Pasture1A2	QUICK1A2	2015	0	PB	10	50	40	0	21
Pasture1A2	QUICK1A2	2015	0	PB	25	25	40	10	20
Pasture1A2	QUICK1A2	2015	0	PB	40	5	55	0	10
Pasture1A2	QUICK1A2	2015	0	PB	20	50	30	0	27
Pasture2A2	QUICK2A2	2015	0	RG	20	0	80	0	18
Pasture2A2	QUICK2A2	2015	0	RG	25	0	65	10	13
Pasture2A2	QUICK2A2	2015	0	RG	15	0	85	0	7
Pasture2A2	QUICK2A2	2015	0	RG	40	5	55	0	9
Pasture2A2	QUICK2A2	2015	0	RG	10	5	85	0	8
Pasture2A2	QUICK2A2	2015	0	RG	10	0	90	0	4
Pasture2A2	QUICK2A2	2015	0	RG	0	0	5	95	0
Pasture2A2	QUICK2A2	2015	0	RG	0	0	0	100	0
Pasture2A2	QUICK2A2	2015	0	RG	5	0	0	95	0
Pasture2A2	QUICK2A2	2015	0	RG	5	0	5	90	0
Pasture2A2	QUICK2A2	2015	0	RG	10	0	55	35	13
Pasture2A2	QUICK2A2	2015	0	RG	15	0	85	0	17
Pasture2A2	QUICK2A2	2015	0	RG	5	5	90	0	0
Pasture2A2	QUICK2A2	2015	0	RG	45	0	20	35	10
Pasture2A2	QUICK2A2	2015	0	RG	20	30	50	0	11
Pasture2A2	QUICK2A2	2015	0	RG	15	25	60	0	19
Pasture2A2	QUICK2A2	2015	0	RG	30	25	45	0	9
Pasture2A2	QUICK2A2	2015	0	RG	15	0	80	5	0
Pasture2A2	QUICK2A2	2015	0	RG	65	5	30	0	9
Pasture2A2	QUICK2A2	2015	0	RG	50	10	40	0	46
Pasture2A2	QUICK2A2	2015	0	RG	45	40	10	5	31
Pasture2A2	QUICK2A2	2015	0	RG	5	0	10	85	34
Pasture2A2	QUICK2A2	2015	0	RG	70	0	30	0	41
Pasture2A2	QUICK2A2	2015	0	RG	45	45	10	0	45
Pasture2A2	QUICK2A2	2015	0	RG	15	5	80	0	18
Pasture2A2	QUICK2A2	2015	0	RG	30	30	10	0	44
Pasture2A2	QUICK2A2	2015	0	RG	45	10	45	0	34
Pasture2A2	QUICK2A2	2015	0	RG	10	45	45	0	19
Pasture2A2	QUICK2A2	2015	0	RG	35	15	50	0	36
Pasture2A2	QUICK2A2	2015	0	RG	55	25	20	0	38
Pasture4B2	QUICK4B2	2015	0	RG	40	20	40	0	12
Pasture4B2	QUICK4B2	2015	0	RG	15	25	60	0	18
Pasture4B2	QUICK4B2	2015	0	RG	25	0	75	0	14
Pasture4B2	QUICK4B2	2015	0	RG	85	0	15	0	42
Pasture4B2	QUICK4B2	2015	0	RG	85	5	10	0	34
Pasture4B2	QUICK4B2	2015	0	RG	55	15	0	30	22
Pasture4B2	QUICK4B2	2015	0	RG	75	0	25	0	63
Pasture4B2	QUICK4B2	2015	0	RG	95	5	0	0	61
Pasture4B2	QUICK4B2	2015	0	RG	75	0	30	0	25
Pasture4B2	QUICK4B2	2015	0	RG	50	0	30	20	37
Pasture4B2	QUICK4B2	2015	0	RG	90	0	10	0	4
Pasture4B2	QUICK4B2	2015	0	RG	70	10	5	15	46
Pasture4B2	QUICK4B2	2015	0	RG	45	0	5	50	30
Pasture4B2	QUICK4B2	2015	0	RG	70	0	30	0	12
Pasture4B2	QUICK4B2	2015	0	RG	70	25	5	0	45
Pasture4B2	QUICK4B2	2015	0	RG	70	0	25	5	43
Pasture4B2	QUICK4B2	2015	0	RG	80	10	10	0	55
Pasture4B2	QUICK4B2	2015	0	RG	90	0	5	5	27
Pasture4B2	QUICK4B2	2015	0	RG	55	25	20	0	14
Pasture4B2	QUICK4B2	2015	0	RG	30	70	0	0	67
Pasture4B2	QUICK4B2	2015	0	RG	90	0	10	0	52
Pasture4B2	QUICK4B2	2015	0	RG	80	0	20	0	45
Pasture4B2	QUICK4B2	2015	0	RG	65	0	20	15	34
Pasture4B2	QUICK4B2	2015	0	RG	25	0	0	75	6
Pasture1B2	QUICK1B2	2015	0	PB	85	5	10	0	27
Pasture1B2	QUICK1B2	2015	0	PB	90	0	10	0	41
Pasture1B2	QUICK1B2	2015	0	PB	80	0	20	0	24
Pasture1B2	QUICK1B2	2015	0	PB	70	0	30	0	45
Pasture1B2	QUICK1B2	2015	0	PB	80	0	20	0	65
Pasture1B2	QUICK1B2	2015	0	PB	95	0	5	0	38
Pasture1B2	QUICK1B2	2015	0	PB	80	0	20	0	44
Pasture1B2	QUICK1B2	2015	0	PB	90	0	10	0	44
Pasture1B2	QUICK1B2	2015	0	PB	80	0	20	0	59
Pasture1B2	QUICK1B2	2015	0	PB	90	0	10	0	42
Pasture1B2	QUICK1B2	2015	0	PB	90	0	10	0	53
Pasture1B2	QUICK1B2	2015	0	PB	95	0	5	0	30
Pasture1B2	QUICK1B2	2015	0	PB	80	0	20	0	23
Pasture1B2	QUICK1B2	2015	0	PB	90	5	5	0	43
Pasture1B2	QUICK1B2	2015	0	PB	85	0	15	0	47
Pasture1B2	QUICK1B2	2015	0	PB	70	0	30	0	32
Pasture1B2	QUICK1B2	2015	0	PB	70	0	30	0	20
Pasture1B2	QUICK1B2	2015	0	PB	60	0	0	40	9
Pasture1B2	QUICK1B2	2015	0	PB	30	0	0	70	15
Pasture1B2	QUICK1B2	2015	0	PB	50	0	40	10	8
Pasture1B2	QUICK1B2	2015	0	PB	30	0	0	70	25
Pasture1B2	QUICK1B2	2015	0	PB	40	0	10	50	11
Pasture1B2	QUICK1B2	2015	0	PB	40	0	0	60	8
Pasture1B2	QUICK1B2	2015	0	PB	40	10	40	10	8
Pasture 2B2	QUICK2B2	2015	0	RG	45	0	55	0	12
Pasture 2B2	QUICK2B2	2015	0	RG	5	0	95	0	15
Pasture 2B2	QUICK2B2	2015	0	RG	45	5	50	0	10
Pasture 2B2	QUICK2B2	2015	0	RG	25	0	75	0	17
Pasture 2B2	QUICK2B2	2015	0	RG	65	0	35	0	9
Pasture 2B2	QUICK2B2	2015	0	RG	40	0	60	0	19
Pasture 2B2	QUICK2B2	2015	0	RG	20	0	80	0	11
Pasture 2B2	QUICK2B2	2015	0	RG	30	0	70	0	0
Pasture 2B2	QUICK2B2	2015	0	RG	15	0	85	0	10
Pasture 2B2	QUICK2B2	2015	0	RG	45	0	55	0	12
Pasture 2B2	QUICK2B2	2015	0	RG	40	0	60	0	0
Pasture 2B2	QUICK2B2	2015	0	RG	10	0	85	5	8
Pasture 2B2	QUICK2B2	2015	0	RG	45	0	55	0	4
Pasture 2B2	QUICK2B2	2015	0	RG	30	0	50	20	16
Pasture 2B2	QUICK2B2	2015	0	RG	50	0	50	0	20
Pasture 2B2	QUICK2B2	2015	0	RG	65	0	35	0	9
Pasture 2B2	QUICK2B2	2015	0	RG	90	0	10	0	21
Pasture 2B2	QUICK2B2	2015	0	RG	90	0	10	0	31
Pasture 2B2	QUICK2B2	2015	0	RG	65	0	35	0	15
Pasture 2B2	QUICK2B2	2015	0	RG	60	0	40	0	28
Pasture 2B2	QUICK2B2	2015	0	RG	60	0	30	10	28
Pasture 2B2	QUICK2B2	2015	0	RG	30	0	70	0	17
Pasture 2B2	QUICK2B2	2015	0	RG	40	5	55	0	28
Pasture 2B2	QUICK2B2	2015	0	RG	45	0	50	5	8
Pasture 2B2	QUICK2B2	2015	0	RG	90	0	10	0	20
Pasture 2B2	QUICK2B2	2015	0	RG	5	0	95	0	0
Pasture 2B2	QUICK2B2	2015	0	RG	40	10	50	0	15
Pasture 2B2	QUICK2B2	2015	0	RG	80	10	10	0	35
Pasture 2B2	QUICK2B2	2015	0	RG	60	0	40	0	22
Pasture 2B2	QUICK2B2	2015	0	RG	50	0	50	0	10
Pasture3B2	QUICK3B2	2015	0	PB	85	0	15	0	29
Pasture3B2	QUICK3B2	2015	0	PB	75	10	5	0	24
Pasture3B2	QUICK3B2	2015	0	PB	60	0	0	0	41
Pasture3B2	QUICK3B2	2015	0	PB	90	5	5	0	43
Pasture3B2	QUICK3B2	2015	0	PB	65	0	35	0	44
Pasture3B2	QUICK3B2	2015	0	PB	60	20	5	0	26
Pasture3B2	QUICK3B2	2015	0	PB	65	0	35	0	0
Pasture3B2	QUICK3B2	2015	0	PB	15	0	85	0	5
Pasture3B2	QUICK3B2	2015	0	PB	85	0	0	15	16
Pasture3B2	QUICK3B2	2015	0	PB	30	0	10	60	19
Pasture3B2	QUICK3B2	2015	0	PB	90	0	0	10	26
Pasture3B2	QUICK3B2	2015	0	PB	90	0	5	5	20
Pasture3B2	QUICK3B2	2015	0	PB	30	0	0	70	14
Pasture3B2	QUICK3B2	2015	0	PB	55	0	5	40	49
Pasture3B2	QUICK3B2	2015	0	PB	15	0	5	80	29
Pasture3B2	QUICK3B2	2015	0	PB	55	0	5	40	13
Pasture3B2	QUICK3B2	2015	0	PB	80	0	0	20	19
Pasture3B2	QUICK3B2	2015	0	PB	25	5	0	70	24
Pasture3B2	QUICK3B2	2015	0	PB	75	15	10	0	1
Pasture3B2	QUICK3B2	2015	0	PB	75	0	10	15	27
Pasture3B2	QUICK3B2	2015	0	PB	90	0	0	0	66
Pasture3B2	QUICK3B2	2015	0	PB	35	0	0	65	0
Pasture3B2	QUICK3B2	2015	0	PB	30	10	5	55	23
Pasture3B2	QUICK3B2	2015	0	PB	60	0	40	0	27
Pasture3B2	QUICK3B2	2015	0	PB	60	0	35	0	23
Pasture3B2	QUICK3B2	2015	0	PB	10	45	25	0	7
Pasture3B2	QUICK3B2	2015	0	PB	65	30	5	0	38
Pasture3B2	QUICK3B2	2015	0	PB	10	5	0	0	65
Pasture3B2	QUICK3B2	2015	0	PB	55	30	5	0	61
Pasture3B2	QUICK3B2	2015	0	PB	95	5	0	0	41
Pasture3C2	QUICK3C2	2015	0	PB	75	0	25	0	12
Pasture3C2	QUICK3C2	2015	0	PB	60	0	40	0	41
Pasture3C2	QUICK3C2	2015	0	PB	80	0	5	15	68
Pasture3C2	QUICK3C2	2015	0	PB	65	0	20	15	66
Pasture3C2	QUICK3C2	2015	0	PB	85	0	15	0	51
Pasture3C2	QUICK3C2	2015	0	PB	80	0	20	0	53
Pasture3C2	QUICK3C2	2015	0	PB	95	0	0	5	85
Pasture3C2	QUICK3C2	2015	0	PB	90	0	0	10	68
Pasture3C2	QUICK3C2	2015	0	PB	95	0	5	0	36
Pasture3C2	QUICK3C2	2015	0	PB	85	0	0	15	50
Pasture3C2	QUICK3C2	2015	0	PB	90	0	0	10	59
Pasture3C2	QUICK3C2	2015	0	PB	40	0	0	60	49
Pasture3C2	QUICK3C2	2015	0	PB	50	0	5	45	38
Pasture3C2	QUICK3C2	2015	0	PB	85	0	0	15	46
Pasture3C2	QUICK3C2	2015	0	PB	55	0	5	40	47
Pasture3C2	QUICK3C2	2015	0	PB	55	0	0	45	31
Pasture3C2	QUICK3C2	2015	0	PB	50	0	5	45	29
Pasture3C2	QUICK3C2	2015	0	PB	40	0	10	50	25
Pasture3C2	QUICK3C2	2015	0	PB	85	0	15	0	28
Pasture3C2	QUICK3C2	2015	0	PB	75	0	25	0	42
Pasture3C2	QUICK3C2	2015	0	PB	75	0	25	0	33
Pasture3C2	QUICK3C2	2015	0	PB	85	5	10	0	43
Pasture3C2	QUICK3C2	2015	0	PB	35	0	5	60	23
Pasture3C2	QUICK3C2	2015	0	PB	95	0	5	0	27
Pasture3C2	QUICK3C2	2015	0	PB	40	0	60	0	44
Pasture3C2	QUICK3C2	2015	0	PB	95	0	5	0	104
Pasture3C2	QUICK3C2	2015	0	PB	60	0	20	20	78
Pasture3C2	QUICK3C2	2015	0	PB	70	0	30	0	36
Pasture3C2	QUICK3C2	2015	0	PB	70	5	25	0	91
Pasture3C2	QUICK3C2	2015	0	PB	20	0	10	70	35

## Sheet: FISP2016
ID	Pasture	Year	use	TRT	Grass	Forb	Lit	BG	SubHgt
/*FISP01(2016_BGAD)*/	BGAD3A3	2016	1	PBG	81.25	5	2.5	11.25	50
/*FISP02*/	BGAD3A3	2016	1	PBG	45	37.5	17.5	0	80
/*FISP03*/	BGAD4A3	2016	1	ROT	86.25	1.25	0	12.5	50
/*FISP04*/	BGAD3A3	2016	1	PBG	23.75	76.25	0	0	100
/*FISP05*/	BGAD6A3	2016	1	PBG	66.25	12.5	20	1.25	40
/*FISP06*/	BGAD4B3	2016	1	ROT	30	65	5	0	70
/*FISP07*/	BGAD2B3	2016	1	ROT	18.75	81.25	0	0	130
/*FISP09*/	BGAD6B3	2016	1	PBG	23.75	68.75	5	2.5	140
/*FISP01(2016_DREC)*/	DREC3A3	2016	1	PBG	0.425	0.0625	0.475	0.0375	70
/*FISP02*/	DREC3A3	2016	1	PBG	0.25	0.275	0.475	0	15
/*FISP03*/	DREC3A3	2016	1	PBG	0.65	0.1	0.25	0	60
/*FISP04*/	DREC3A3	2016	1	PBG	0.525	0	0.2375	0.2375	55
/*FISP05*/	DREC4A3	2016	1	PBG	0.9125	0	0.0875	0	75
/*FISP06*/	DREC5A3	2016	1	ROT	0.875	0	0.125	0	80
/*FISP07*/	DREC3A3	2016	1	PBG	0.9	0.0125	0.05	0.0375	80
/*FISP08*/	DREC3A3	2016	1	PBG	0.8125	0.0625	0.1125	0.0125	80
/*FISP09*/	DREC4A3	2016	1	PBG	0.7875	0.0125	0.1875	0.0125	60
/*FISP10*/	DREC4A3	2016	1	PBG	0.5125	0.0375	0.4125	0.0375	80
/*FISP11*/	DREC5A3	2016	1	ROT	0.8	0	0.2	0	80
/*FISP12*/	DREC3A3	2016	1	PBG	0.6875	0.0125	0.275	0.025	50
/*FISP13*/	DREC3A3	2016	1	PBG	0.725	0.025	0.225	0.025	60
/*FISP14*/	DREC1A3	2016	1	ROT	0.825	0.0125	0.1625	0	90
/*FISP15*/	DREC1A3	2016	1	ROT	0.65	0.0125	0.3375	0	70
/*FISP16*/	DREC3B3	2016	1	PBG	0.6	0	0.3375	0.0625	40
/*FISP17*/	DREC3A3	2016	1	PBG	0.7	0	0.2	0.1	80
/*FISP18*/	DREC4A3	2016	1	PBG	0.6625	0	0.3375	0	40
/*FISP19*/	DREC1A3	2016	1	ROT	0.725	0	0.275	0	70
/*FISP20*/	DREC5A3	2016	1	ROT	0.65	0	0.35	0	80
/*FISP21*/	DREC4A3	2016	1	PBG	0.75	0	0.25	0	80
/*FISP22*/	DREC4A3	2016	1	PBG	0.85	0.0125	0.125	0.0125	80
/*FISP23*/	DREC1B3	2016	1	ROT	0.8625	0	0.1375	0	80
/*FISP24*/	DREC3B3	2016	1	PBG	0.85	0	0.15	0	60
/*FISP26*/	DREC4B3	2016	1	PBG	0.8	0	0.2	0	50
/*FISP27*/	DREC3B3	2016	1	PBG	0.85	0	0.15	0	70
/*FISP29*/	DREC4B3	2016	1	PBG	0.65	0	0.35	0	90
/*FISP30*/	DREC5B3	2016	1	ROT	0.825	0	0.175	0	80
/*FISP31*/	DREC3B3	2016	1	PBG	0.8125	0	0.1875	0	70
/*FISP32*/	DREC3B3	2016	1	PBG	0.7375	0	0.2625	0	70
/*FISP33*/	DREC3B3	2016	1	PBG	0.875	0	0.125	0	60
/*FISP34*/	DREC3B3	2016	1	PBG	0.8625	0	0.1375	0	90
/*FISP35*/	DREC1B3	2016	1	ROT	0.85	0	0.15	0	120
/*FISP36*/	DREC3B3	2016	1	PBG	0.8625	0	0.1375	0	80
/*FISP37*/	DREC3B3	2016	1	PBG	0.8375	0	0.1625	0	100
/*FISP39*/	DREC4C3	2016	1	PBG	0.8375	0	0.1625	0	90
/*FISP40*/	DREC5C3	2016	1	ROT	0.8375	0	0.1625	0	70
/*FISP41*/	DREC4C3	2016	1	PBG	0	0.1625	0.7375	0	230
/*FISP01(2016_QUICK)*/	QUICK1B3	2016	1	PBG	5	7.5	0	62.5	36
Pasture3A3	BGAD3A3	2016	0	PBG	55	10	20	5	10
Pasture3A3	BGAD3A3	2016	0	PBG	20	0	25	15	40
Pasture3A3	BGAD3A3	2016	0	PBG	50	0	30	20	40
Pasture3A3	BGAD3A3	2016	0	PBG	30	5	10	35	20
Pasture3A3	BGAD3A3	2016	0	PBG	25	0	5	50	20
Pasture3A3	BGAD3A3	2016	0	PBG	70	0	0	30	40
Pasture3A3	BGAD3A3	2016	0	PBG	80	0	15	5	40
Pasture3A3	BGAD3A3	2016	0	PBG	85	0	10	5	20
Pasture3A3	BGAD3A3	2016	0	PBG	60	25	10	5	10
Pasture3A3	BGAD3A3	2016	0	PBG	20	50	5	25	30
Pasture3A3	BGAD3A3	2016	0	PBG	20	5	0	75	30
Pasture3A3	BGAD3A3	2016	0	PBG	55	0	35	10	30
Pasture3A3	BGAD3A3	2016	0	PBG	70	15	10	5	40
Pasture3A3	BGAD3A3	2016	0	PBG	75	5	20	0	30
Pasture3A3	BGAD3A3	2016	0	PBG	80	0	20	0	50
Pasture3A3	BGAD3A3	2016	0	PBG	95	0	5	0	30
Pasture3A3	BGAD3A3	2016	0	PBG	85	0	15	0	40
Pasture3A3	BGAD3A3	2016	0	PBG	95	5	0	0	40
Pasture3A3	BGAD3A3	2016	0	PBG	100	0	0	0	50
Pasture3A3	BGAD3A3	2016	0	PBG	100	0	0	0	60
Pasture3A3	BGAD3A3	2016	0	PBG	75	10	15	0	40
Pasture3A3	BGAD3A3	2016	0	PBG	100	0	0	0	60
Pasture3A3	BGAD3A3	2016	0	PBG	80	0	20	0	60
Pasture3A3	BGAD3A3	2016	0	PBG	100	0	0	0	50
Pasture3A3	BGAD3A3	2016	0	PBG	20	0	80	0	30
Pasture3A3	BGAD3A3	2016	0	PBG	5	5	70	25	40
Pasture3A3	BGAD3A3	2016	0	PBG	15	5	80	0	50
Pasture3A3	BGAD3A3	2016	0	PBG	25	0	75	0	40
Pasture3A3	BGAD3A3	2016	0	PBG	20	0	80	0	50
Pasture3A3	BGAD3A3	2016	0	PBG	80	0	15	5	30
Pasture3A3	BGAD3A3	2016	0	PBG	100	0	0	0	110
Pasture3A3	BGAD3A3	2016	0	PBG	90	0	10	0	90
Pasture3A3	BGAD3A3	2016	0	PBG	90	0	10	0	100
Pasture3A3	BGAD3A3	2016	0	PBG	90	0	10	0	90
Pasture3A3	BGAD3A3	2016	0	PBG	95	5	0	0	80
Pasture3A3	BGAD3A3	2016	0	PBG	90	0	10	0	70
Pasture4A3	BGAD4A3	2016	0	ROT	70	5	15	10	30
Pasture4A3	BGAD4A3	2016	0	ROT	95	5	0	0	50
Pasture4A3	BGAD4A3	2016	0	ROT	100	0	0	0	20
Pasture4A3	BGAD4A3	2016	0	ROT	100	0	0	0	30
Pasture4A3	BGAD4A3	2016	0	ROT	100	0	0	0	30
Pasture4A3	BGAD4A3	2016	0	ROT	90	0	10	0	30
Pasture4A3	BGAD4A3	2016	0	ROT	95	5	0	0	30
Pasture4A3	BGAD4A3	2016	0	ROT	85	5	10	0	40
Pasture4A3	BGAD4A3	2016	0	ROT	55	40	5	0	30
Pasture4A3	BGAD4A3	2016	0	ROT	70	20	10	0	30
Pasture4A3	BGAD4A3	2016	0	ROT	45	10	40	5	40
Pasture4A3	BGAD4A3	2016	0	ROT	95	5	0	0	40
Pasture4A3	BGAD4A3	2016	0	ROT	95	5	0	0	40
Pasture4A3	BGAD4A3	2016	0	ROT	90	0	10	0	40
Pasture4A3	BGAD4A3	2016	0	ROT	100	0	0	0	40
Pasture4A3	BGAD4A3	2016	0	ROT	100	0	0	0	40
Pasture4A3	BGAD4A3	2016	0	ROT	95	0	5	0	30
Pasture4A3	BGAD4A3	2016	0	ROT	70	0	30	0	40
Pasture4A3	BGAD4A3	2016	0	ROT	95	0	5	0	40
Pasture4A3	BGAD4A3	2016	0	ROT	5	80	10	5	30
Pasture4A3	BGAD4A3	2016	0	ROT	5	95	0	0	0
Pasture4A3	BGAD4A3	2016	0	ROT	0	20	0	80	0
Pasture4A3	BGAD4A3	2016	0	ROT	80	5	0	15	40
Pasture4A3	BGAD4A3	2016	0	ROT	50	0	0	50	90
Pasture4A3	BGAD4A3	2016	0	ROT	80	10	10	0	30
Pasture4A3	BGAD4A3	2016	0	ROT	75	15	10	0	40
Pasture4A3	BGAD4A3	2016	0	ROT	80	5	10	5	30
Pasture4A3	BGAD4A3	2016	0	ROT	80	10	10	0	30
Pasture4A3	BGAD4A3	2016	0	ROT	70	0	30	0	40
Pasture4A3	BGAD4A3	2016	0	ROT	90	0	10	0	30
Pasture4A3	BGAD4A3	2016	0	ROT	50	0	0	50	70
Pasture4A3	BGAD4A3	2016	0	ROT	65	0	20	15	90
Pasture4A3	BGAD4A3	2016	0	ROT	65	5	30	0	50
Pasture4A3	BGAD4A3	2016	0	ROT	40	0	60	0	40
Pasture4A3	BGAD4A3	2016	0	ROT	50	0	20	30	30
Pasture4A3	BGAD4A3	2016	0	ROT	60	0	40	0	30
Pasture6A3	BGAD6A3	2016	0	PBG	70	0	20	10	20
Pasture6A3	BGAD6A3	2016	0	PBG	10	0	75	15	20
Pasture6A3	BGAD6A3	2016	0	PBG	15	0	75	10	20
Pasture6A3	BGAD6A3	2016	0	PBG	60	0	40	0	30
Pasture6A3	BGAD6A3	2016	0	PBG	25	5	70	0	40
Pasture6A3	BGAD6A3	2016	0	PBG	10	0	80	10	30
Pasture6A3	BGAD6A3	2016	0	PBG	85	0	10	5	50
Pasture6A3	BGAD6A3	2016	0	PBG	70	0	15	15	60
Pasture6A3	BGAD6A3	2016	0	PBG	70	0	30	0	40
Pasture6A3	BGAD6A3	2016	0	PBG	50	20	20	10	40
Pasture6A3	BGAD6A3	2016	0	PBG	60	20	20	0	20
Pasture6A3	BGAD6A3	2016	0	PBG	70	15	0	5	20
Pasture6A3	BGAD6A3	2016	0	PBG	45	5	50	0	30
Pasture6A3	BGAD6A3	2016	0	PBG	80	10	10	0	20
Pasture6A3	BGAD6A3	2016	0	PBG	10	80	10	0	30
Pasture6A3	BGAD6A3	2016	0	PBG	20	70	10	0	50
Pasture6A3	BGAD6A3	2016	0	PBG	60	25	15	0	50
Pasture6A3	BGAD6A3	2016	0	PBG	45	40	15	0	40
Pasture6A3	BGAD6A3	2016	0	PBG	65	0	30	5	20
Pasture6A3	BGAD6A3	2016	0	PBG	10	0	80	5	30
Pasture6A3	BGAD6A3	2016	0	PBG	90	0	10	0	20
Pasture6A3	BGAD6A3	2016	0	PBG	80	0	20	0	30
Pasture6A3	BGAD6A3	2016	0	PBG	40	0	50	10	40
Pasture6A3	BGAD6A3	2016	0	PBG	60	0	40	0	30
Pasture6A3	BGAD6A3	2016	0	PBG	85	0	15	0	60
Pasture6A3	BGAD6A3	2016	0	PBG	60	0	40	0	60
Pasture6A3	BGAD6A3	2016	0	PBG	90	0	10	0	40
Pasture6A3	BGAD6A3	2016	0	PBG	80	0	15	5	40
Pasture6A3	BGAD6A3	2016	0	PBG	70	0	30	0	30
Pasture6A3	BGAD6A3	2016	0	PBG	90	0	10	0	30
Pasture4B3	BGAD4B3	2016	0	ROT	80	0	20	0	40
Pasture4B3	BGAD4B3	2016	0	ROT	55	5	40	0	40
Pasture4B3	BGAD4B3	2016	0	ROT	55	0	30	15	30
Pasture4B3	BGAD4B3	2016	0	ROT	70	0	30	0	30
Pasture4B3	BGAD4B3	2016	0	ROT	70	0	30	0	50
Pasture4B3	BGAD4B3	2016	0	ROT	65	5	30	0	50
Pasture4B3	BGAD4B3	2016	0	ROT	100	0	0	0	70
Pasture4B3	BGAD4B3	2016	0	ROT	60	30	10	0	70
Pasture4B3	BGAD4B3	2016	0	ROT	90	0	10	0	70
Pasture4B3	BGAD4B3	2016	0	ROT	70	0	30	0	60
Pasture4B3	BGAD4B3	2016	0	ROT	65	15	20	0	50
Pasture4B3	BGAD4B3	2016	0	ROT	100	0	0	0	60
Pasture4B3	BGAD4B3	2016	0	ROT	85	0	10	5	40
Pasture4B3	BGAD4B3	2016	0	ROT	85	0	5	10	50
Pasture4B3	BGAD4B3	2016	0	ROT	75	5	20	0	60
Pasture4B3	BGAD4B3	2016	0	ROT	100	0	0	0	50
Pasture4B3	BGAD4B3	2016	0	ROT	60	0	20	20	40
Pasture4B3	BGAD4B3	2016	0	ROT	25	0	75	0	30
Pasture4B3	BGAD4B3	2016	0	ROT	50	30	10	20	20
Pasture4B3	BGAD4B3	2016	0	ROT	30	50	20	0	30
Pasture4B3	BGAD4B3	2016	0	ROT	50	50	0	0	60
Pasture4B3	BGAD4B3	2016	0	ROT	30	30	10	30	40
Pasture4B3	BGAD4B3	2016	0	ROT	70	10	0	20	60
Pasture4B3	BGAD4B3	2016	0	ROT	40	60	0	0	30
Pasture4B3	BGAD4B3	2016	0	ROT	80	10	10	0	60
Pasture4B3	BGAD4B3	2016	0	ROT	60	0	40	0	50
Pasture4B3	BGAD4B3	2016	0	ROT	70	0	30	0	40
Pasture4B3	BGAD4B3	2016	0	ROT	70	0	30	0	50
Pasture4B3	BGAD4B3	2016	0	ROT	80	0	20	0	50
Pasture4B3	BGAD4B3	2016	0	ROT	80	0	10	10	50
Pasture4B3	BGAD4B3	2016	0	ROT	70	20	10	0	50
Pasture4B3	BGAD4B3	2016	0	ROT	20	20	80	0	60
Pasture4B3	BGAD4B3	2016	0	ROT	50	0	30	20	50
Pasture4B3	BGAD4B3	2016	0	ROT	100	0	0	0	80
Pasture4B3	BGAD4B3	2016	0	ROT	15	5	80	0	40
Pasture4B3	BGAD4B3	2016	0	ROT	60	10	30	0	50
Pasture2B3	BGAD2B3	2016	0	ROT	70	5	25	0	40
Pasture2B3	BGAD2B3	2016	0	ROT	70	0	20	10	40
Pasture2B3	BGAD2B3	2016	0	ROT	60	0	40	0	70
Pasture2B3	BGAD2B3	2016	0	ROT	70	0	30	0	50
Pasture2B3	BGAD2B3	2016	0	ROT	50	10	40	0	70
Pasture2B3	BGAD2B3	2016	0	ROT	5	80	5	10	50
Pasture2B3	BGAD2B3	2016	0	ROT	90	5	0	5	30
Pasture2B3	BGAD2B3	2016	0	ROT	80	0	0	20	20
Pasture2B3	BGAD2B3	2016	0	ROT	65	0	10	25	30
Pasture2B3	BGAD2B3	2016	0	ROT	70	0	30	0	60
Pasture2B3	BGAD2B3	2016	0	ROT	90	0	5	5	50
Pasture2B3	BGAD2B3	2016	0	ROT	75	0	25	0	40
Pasture2B3	BGAD2B3	2016	0	ROT	50	15	15	20	60
Pasture2B3	BGAD2B3	2016	0	ROT	55	0	40	5	70
Pasture2B3	BGAD2B3	2016	0	ROT	90	0	10	0	60
Pasture2B3	BGAD2B3	2016	0	ROT	25	5	65	5	50
Pasture2B3	BGAD2B3	2016	0	ROT	70	0	30	0	60
Pasture2B3	BGAD2B3	2016	0	ROT	70	0	25	5	30
Pasture2B3	BGAD2B3	2016	0	ROT	60	0	10	30	40
Pasture2B3	BGAD2B3	2016	0	ROT	55	5	40	0	30
Pasture2B3	BGAD2B3	2016	0	ROT	15	5	0	80	40
Pasture2B3	BGAD2B3	2016	0	ROT	40	15	25	10	70
Pasture2B3	BGAD2B3	2016	0	ROT	55	5	40	0	40
Pasture2B3	BGAD2B3	2016	0	ROT	75	0	25	0	50
Pasture2B3	BGAD2B3	2016	0	ROT	65	0	10	25	40
Pasture2B3	BGAD2B3	2016	0	ROT	5	5	90	0	30
Pasture2B3	BGAD2B3	2016	0	ROT	100	0	0	0	40
Pasture2B3	BGAD2B3	2016	0	ROT	85	5	10	0	30
Pasture2B3	BGAD2B3	2016	0	ROT	30	30	40	0	30
Pasture2B3	BGAD2B3	2016	0	ROT	100	0	0	0	60
Pasture2B3	BGAD2B3	2016	0	ROT	100	0	0	0	70
Pasture2B3	BGAD2B3	2016	0	ROT	50	0	50	0	40
Pasture2B3	BGAD2B3	2016	0	ROT	30	0	0	70	40
Pasture2B3	BGAD2B3	2016	0	ROT	60	0	40	0	70
Pasture2B3	BGAD2B3	2016	0	ROT	45	5	40	10	40
Pasture2B3	BGAD2B3	2016	0	ROT	100	0	0	0	60
Pasture6B3	BGAD6B3	2016	0	PBG	5	55	40	0	40
Pasture6B3	BGAD6B3	2016	0	PBG	10	10	80	0	10
Pasture6B3	BGAD6B3	2016	0	PBG	80	10	0	10	30
Pasture6B3	BGAD6B3	2016	0	PBG	0	80	20	0	60
Pasture6B3	BGAD6B3	2016	0	PBG	30	60	10	0	40
Pasture6B3	BGAD6B3	2016	0	PBG	30	40	30	0	50
Pasture6B3	BGAD6B3	2016	0	PBG	70	0	30	0	40
Pasture6B3	BGAD6B3	2016	0	PBG	80	0	20	0	30
Pasture6B3	BGAD6B3	2016	0	PBG	65	15	20	0	30
Pasture6B3	BGAD6B3	2016	0	PBG	40	50	10	0	60
Pasture6B3	BGAD6B3	2016	0	PBG	0	70	30	0	40
Pasture6B3	BGAD6B3	2016	0	PBG	20	80	0	0	60
Pasture6B3	BGAD6B3	2016	0	PBG	80	0	10	10	60
Pasture6B3	BGAD6B3	2016	0	PBG	40	0	10	50	70
Pasture6B3	BGAD6B3	2016	0	PBG	80	0	10	10	60
Pasture6B3	BGAD6B3	2016	0	PBG	80	0	20	0	50
Pasture6B3	BGAD6B3	2016	0	PBG	70	10	10	10	20
Pasture6B3	BGAD6B3	2016	0	PBG	25	5	30	40	30
Pasture6B3	BGAD6B3	2016	0	PBG	55	0	30	15	50
Pasture6B3	BGAD6B3	2016	0	PBG	75	0	0	25	50
Pasture6B3	BGAD6B3	2016	0	PBG	90	0	10	0	40
Pasture6B3	BGAD6B3	2016	0	PBG	90	0	0	10	10
Pasture6B3	BGAD6B3	2016	0	PBG	65	5	10	20	50
Pasture6B3	BGAD6B3	2016	0	PBG	80	0	20	0	40
Pasture6B3	BGAD6B3	2016	0	PBG	50	0	0	50	20
Pasture6B3	BGAD6B3	2016	0	PBG	40	10	50	0	30
Pasture6B3	BGAD6B3	2016	0	PBG	25	5	70	0	30
Pasture6B3	BGAD6B3	2016	0	PBG	20	0	60	20	20
Pasture6B3	BGAD6B3	2016	0	PBG	25	0	75	0	30
Pasture6B3	BGAD6B3	2016	0	PBG	70	0	20	10	30
Pasture1A3	DREC1A3	2016	0	RG	55	10	35	0	60
Pasture1A3	DREC1A3	2016	0	RG	40	0	60	0	50
Pasture1A3	DREC1A3	2016	0	RG	60	0	40	0	60
Pasture1A3	DREC1A3	2016	0	RG	50	0	45	5	50
Pasture1A3	DREC1A3	2016	0	RG	80	0	20	0	70
Pasture1A3	DREC1A3	2016	0	RG	60	10	20	10	60
Pasture1A3	DREC1A3	2016	0	RG	50	0	50	0	70
Pasture1A3	DREC1A3	2016	0	RG	80	0	20	0	70
Pasture1A3	DREC1A3	2016	0	RG	80	0	20	0	60
Pasture1A3	DREC1A3	2016	0	RG	70	0	30	0	60
Pasture1A3	DREC1A3	2016	0	RG	70	0	30	0	40
Pasture1A3	DREC1A3	2016	0	RG	75	0	25	0	70
Pasture1A3	DREC1A3	2016	0	RG	90	0	10	0	50
Pasture1A3	DREC1A3	2016	0	RG	15	10	75	0	40
Pasture1A3	DREC1A3	2016	0	RG	90	0	10	0	60
Pasture1A3	DREC1A3	2016	0	RG	90	0	10	0	60
Pasture1A3	DREC1A3	2016	0	RG	40	0	60	0	50
Pasture1A3	DREC1A3	2016	0	RG	60	0	40	0	70
Pasture1A3	DREC1A3	2016	0	RG	80	0	20	0	50
Pasture1A3	DREC1A3	2016	0	RG	70	0	30	0	50
Pasture1A3	DREC1A3	2016	0	RG	40	5	55	0	60
Pasture1A3	DREC1A3	2016	0	RG	40	0	60	0	60
Pasture1A3	DREC1A3	2016	0	RG	50	0	40	10	50
Pasture1A3	DREC1A3	2016	0	RG	25	0	75	0	60
Pasture3A3	DREC3A3	2016	0	PBG	70	5	20	5	70
Pasture3A3	DREC3A3	2016	0	PBG	95	0	5	0	80
Pasture3A3	DREC3A3	2016	0	PBG	35	10	55	0	70
Pasture3A3	DREC3A3	2016	0	PBG	95	0	5	0	60
Pasture3A3	DREC3A3	2016	0	PBG	20	40	40	0	60
Pasture3A3	DREC3A3	2016	0	PBG	80	0	20	0	70
Pasture3A3	DREC3A3	2016	0	PBG	85	0	15	0	70
Pasture3A3	DREC3A3	2016	0	PBG	60	5	30	5	80
Pasture3A3	DREC3A3	2016	0	PBG	75	5	10	10	60
Pasture3A3	DREC3A3	2016	0	PBG	45	5	50	0	70
Pasture3A3	DREC3A3	2016	0	PBG	85	0	15	0	70
Pasture3A3	DREC3A3	2016	0	PBG	80	0	20	0	70
Pasture3A3	DREC3A3	2016	0	PBG	90	0	10	0	60
Pasture3A3	DREC3A3	2016	0	PBG	65	0	10	25	50
Pasture3A3	DREC3A3	2016	0	PBG	70	0	0	30	40
Pasture3A3	DREC3A3	2016	0	PBG	60	5	10	25	40
Pasture3A3	DREC3A3	2016	0	PBG	55	5	25	15	30
Pasture3A3	DREC3A3	2016	0	PBG	55	5	30	20	40
Pasture3A3	DREC3A3	2016	0	PBG	70	5	20	5	80
Pasture3A3	DREC3A3	2016	0	PBG	70	0	30	0	70
Pasture3A3	DREC3A3	2016	0	PBG	50	0	40	10	70
Pasture3A3	DREC3A3	2016	0	PBG	60	5	10	25	70
Pasture3A3	DREC3A3	2016	0	PBG	10	5	10	75	50
Pasture3A3	DREC3A3	2016	0	PBG	60	0	35	5	40
Pasture4A3	DREC4A3	2016	0	PBG	90	0	10	0	70
Pasture4A3	DREC4A3	2016	0	PBG	95	0	5	0	70
Pasture4A3	DREC4A3	2016	0	PBG	90	0	10	0	70
Pasture4A3	DREC4A3	2016	0	PBG	80	5	15	0	60
Pasture4A3	DREC4A3	2016	0	PBG	85	0	15	0	80
Pasture4A3	DREC4A3	2016	0	PBG	30	15	55	0	60
Pasture4A3	DREC4A3	2016	0	PBG	85	0	15	0	50
Pasture4A3	DREC4A3	2016	0	PBG	75	0	25	0	50
Pasture4A3	DREC4A3	2016	0	PBG	40	0	60	0	60
Pasture4A3	DREC4A3	2016	0	PBG	55	0	45	0	40
Pasture4A3	DREC4A3	2016	0	PBG	80	0	20	0	40
Pasture4A3	DREC4A3	2016	0	PBG	80	5	15	0	40
Pasture4A3	DREC4A3	2016	0	PBG	90	0	10	0	40
Pasture4A3	DREC4A3	2016	0	PBG	75	5	20	0	50
Pasture4A3	DREC4A3	2016	0	PBG	50	0	50	0	50
Pasture4A3	DREC4A3	2016	0	PBG	45	0	50	5	40
Pasture4A3	DREC4A3	2016	0	PBG	85	0	15	0	50
Pasture4A3	DREC4A3	2016	0	PBG	70	5	25	0	40
Pasture4A3	DREC4A3	2016	0	PBG	90	0	10	0	70
Pasture4A3	DREC4A3	2016	0	PBG	35	0	60	5	70
Pasture4A3	DREC4A3	2016	0	PBG	85	0	15	0	70
Pasture4A3	DREC4A3	2016	0	PBG	65	5	30	0	60
Pasture4A3	DREC4A3	2016	0	PBG	80	0	20	0	50
Pasture4A3	DREC4A3	2016	0	PBG	65	0	30	5	70
Pasture5A3	DREC5A3	2016	0	RG	95	0	5	0	50
Pasture5A3	DREC5A3	2016	0	RG	95	0	5	0	40
Pasture5A3	DREC5A3	2016	0	RG	95	0	5	0	40
Pasture5A3	DREC5A3	2016	0	RG	90	0	10	0	40
Pasture5A3	DREC5A3	2016	0	RG	95	0	5	0	50
Pasture5A3	DREC5A3	2016	0	RG	90	0	10	0	40
Pasture5A3	DREC5A3	2016	0	RG	70	0	30	0	60
Pasture5A3	DREC5A3	2016	0	RG	60	0	40	0	50
Pasture5A3	DREC5A3	2016	0	RG	90	0	10	0	60
Pasture5A3	DREC5A3	2016	0	RG	85	0	15	0	60
Pasture5A3	DREC5A3	2016	0	RG	55	0	45	0	60
Pasture5A3	DREC5A3	2016	0	RG	60	0	40	0	50
Pasture5A3	DREC5A3	2016	0	RG	90	0	10	0	70
Pasture5A3	DREC5A3	2016	0	RG	90	0	10	0	60
Pasture5A3	DREC5A3	2016	0	RG	70	0	30	0	60
Pasture5A3	DREC5A3	2016	0	RG	95	0	5	0	60
Pasture5A3	DREC5A3	2016	0	RG	65	0	35	0	70
Pasture5A3	DREC5A3	2016	0	RG	80	0	20	0	70
Pasture5A3	DREC5A3	2016	0	RG	80	0	20	0	60
Pasture5A3	DREC5A3	2016	0	RG	40	0	60	0	80
Pasture5A3	DREC5A3	2016	0	RG	85	0	15	0	60
Pasture5A3	DREC5A3	2016	0	RG	85	0	15	0	70
Pasture5A3	DREC5A3	2016	0	RG	90	0	10	0	60
Pasture5A3	DREC5A3	2016	0	RG	90	0	10	0	60
Pasture5A3	DREC5A3	2016	0	RG	90	0	10	0	60
Pasture5A3	DREC5A3	2016	0	RG	85	0	15	0	70
Pasture5A3	DREC5A3	2016	0	RG	95	0	5	0	50
Pasture5A3	DREC5A3	2016	0	RG	90	5	5	0	50
Pasture5A3	DREC5A3	2016	0	RG	95	0	5	0	50
Pasture5A3	DREC5A3	2016	0	RG	85	5	10	0	50
Pasture1B3	DREC1B3	2016	0	RG	60	0	40	0	60
Pasture1B3	DREC1B3	2016	0	RG	40	0	60	0	50
Pasture1B3	DREC1B3	2016	0	RG	85	10	5	0	60
Pasture1B3	DREC1B3	2016	0	RG	70	10	10	10	60
Pasture1B3	DREC1B3	2016	0	RG	85	10	5	0	60
Pasture1B3	DREC1B3	2016	0	RG	90	0	10	0	70
Pasture1B3	DREC1B3	2016	0	RG	60	0	40	0	50
Pasture1B3	DREC1B3	2016	0	RG	70	0	30	0	30
Pasture1B3	DREC1B3	2016	0	RG	85	0	15	0	60
Pasture1B3	DREC1B3	2016	0	RG	90	0	10	0	60
Pasture1B3	DREC1B3	2016	0	RG	75	0	25	0	60
Pasture1B3	DREC1B3	2016	0	RG	95	0	5	0	50
Pasture1B3	DREC1B3	2016	0	RG	80	0	20	0	50
Pasture1B3	DREC1B3	2016	0	RG	90	0	10	0	40
Pasture1B3	DREC1B3	2016	0	RG	85	0	15	0	50
Pasture1B3	DREC1B3	2016	0	RG	90	0	10	0	40
Pasture1B3	DREC1B3	2016	0	RG	20	0	75	5	50
Pasture1B3	DREC1B3	2016	0	RG	70	0	30	0	70
Pasture1B3	DREC1B3	2016	0	RG	85	0	15	0	40
Pasture1B3	DREC1B3	2016	0	RG	85	0	15	0	30
Pasture1B3	DREC1B3	2016	0	RG	90	0	10	0	50
Pasture1B3	DREC1B3	2016	0	RG	75	5	15	5	40
Pasture1B3	DREC1B3	2016	0	RG	95	0	5	0	50
Pasture1B3	DREC1B3	2016	0	RG	50	0	50	0	80
Pasture3B3	DREC3B3	2016	0	PBG	90	0	10	0	60
Pasture3B3	DREC3B3	2016	0	PBG	40	0	60	0	50
Pasture3B3	DREC3B3	2016	0	PBG	90	0	10	0	40
Pasture3B3	DREC3B3	2016	0	PBG	60	0	40	0	40
Pasture3B3	DREC3B3	2016	0	PBG	95	0	5	0	40
Pasture3B3	DREC3B3	2016	0	PBG	85	0	15	0	50
Pasture3B3	DREC3B3	2016	0	PBG	90	0	10	0	60
Pasture3B3	DREC3B3	2016	0	PBG	60	0	40	0	50
Pasture3B3	DREC3B3	2016	0	PBG	90	0	10	0	60
Pasture3B3	DREC3B3	2016	0	PBG	85	0	10	5	40
Pasture3B3	DREC3B3	2016	0	PBG	90	0	10	0	50
Pasture3B3	DREC3B3	2016	0	PBG	85	0	15	0	40
Pasture3B3	DREC3B3	2016	0	PBG	95	0	5	0	40
Pasture3B3	DREC3B3	2016	0	PBG	85	0	15	0	30
Pasture3B3	DREC3B3	2016	0	PBG	65	5	30	0	30
Pasture3B3	DREC3B3	2016	0	PBG	80	0	20	0	20
Pasture3B3	DREC3B3	2016	0	PBG	70	0	30	0	40
Pasture3B3	DREC3B3	2016	0	PBG	90	0	10	0	30
Pasture3B3	DREC3B3	2016	0	PBG	90	0	10	0	60
Pasture3B3	DREC3B3	2016	0	PBG	85	0	15	0	40
Pasture3B3	DREC3B3	2016	0	PBG	90	0	10	0	40
Pasture3B3	DREC3B3	2016	0	PBG	95	0	5	0	50
Pasture3B3	DREC3B3	2016	0	PBG	95	0	5	0	50
Pasture3B3	DREC3B3	2016	0	PBG	85	5	10	0	60
Pasture4B3	DREC4B3	2016	0	PBG	95	0	5	0	60
Pasture4B3	DREC4B3	2016	0	PBG	85	0	15	0	50
Pasture4B3	DREC4B3	2016	0	PBG	90	0	5	5	50
Pasture4B3	DREC4B3	2016	0	PBG	90	0	10	0	40
Pasture4B3	DREC4B3	2016	0	PBG	75	0	25	0	50
Pasture4B3	DREC4B3	2016	0	PBG	80	0	15	5	40
Pasture4B3	DREC4B3	2016	0	PBG	80	0	20	0	50
Pasture4B3	DREC4B3	2016	0	PBG	90	0	10	0	60
Pasture4B3	DREC4B3	2016	0	PBG	85	0	10	5	40
Pasture4B3	DREC4B3	2016	0	PBG	60	0	40	0	30
Pasture4B3	DREC4B3	2016	0	PBG	90	0	10	0	30
Pasture4B3	DREC4B3	2016	0	PBG	60	0	40	0	30
Pasture4B3	DREC4B3	2016	0	PBG	90	0	10	0	50
Pasture4B3	DREC4B3	2016	0	PBG	95	0	5	0	40
Pasture4B3	DREC4B3	2016	0	PBG	75	0	25	0	40
Pasture4B3	DREC4B3	2016	0	PBG	55	0	5	40	40
Pasture4B3	DREC4B3	2016	0	PBG	90	0	10	0	40
Pasture4B3	DREC4B3	2016	0	PBG	55	0	45	0	30
Pasture4B3	DREC4B3	2016	0	PBG	80	0	20	0	80
Pasture4B3	DREC4B3	2016	0	PBG	60	0	40	0	50
Pasture4B3	DREC4B3	2016	0	PBG	95	0	5	0	40
Pasture4B3	DREC4B3	2016	0	PBG	80	5	15	0	50
Pasture4B3	DREC4B3	2016	0	PBG	90	0	10	0	40
Pasture4B3	DREC4B3	2016	0	PBG	80	0	20	0	50
Pasture5B3	DREC5B3	2016	0	RG	95	0	5	0	50
Pasture5B3	DREC5B3	2016	0	RG	75	5	20	0	40
Pasture5B3	DREC5B3	2016	0	RG	80	0	20	0	40
Pasture5B3	DREC5B3	2016	0	RG	85	0	15	0	40
Pasture5B3	DREC5B3	2016	0	RG	60	0	40	0	50
Pasture5B3	DREC5B3	2016	0	RG	25	0	75	0	40
Pasture5B3	DREC5B3	2016	0	RG	85	0	5	0	50
Pasture5B3	DREC5B3	2016	0	RG	90	0	10	0	40
Pasture5B3	DREC5B3	2016	0	RG	75	0	25	0	40
Pasture5B3	DREC5B3	2016	0	RG	100	0	0	0	40
Pasture5B3	DREC5B3	2016	0	RG	85	0	15	0	40
Pasture5B3	DREC5B3	2016	0	RG	80	10	10	0	60
Pasture5B3	DREC5B3	2016	0	RG	80	0	20	0	60
Pasture5B3	DREC5B3	2016	0	RG	75	0	25	0	60
Pasture5B3	DREC5B3	2016	0	RG	100	0	0	0	70
Pasture5B3	DREC5B3	2016	0	RG	90	0	10	0	50
Pasture5B3	DREC5B3	2016	0	RG	70	0	30	0	50
Pasture5B3	DREC5B3	2016	0	RG	85	0	15	0	50
Pasture5B3	DREC5B3	2016	0	RG	95	0	5	0	80
Pasture5B3	DREC5B3	2016	0	RG	80	0	10	10	60
Pasture5B3	DREC5B3	2016	0	RG	85	0	5	10	50
Pasture5B3	DREC5B3	2016	0	RG	75	0	25	0	60
Pasture5B3	DREC5B3	2016	0	RG	75	0	15	10	60
Pasture5B3	DREC5B3	2016	0	RG	90	0	10	0	50
Pasture5B3	DREC5B3	2016	0	RG	95	0	5	0	80
Pasture5B3	DREC5B3	2016	0	RG	90	0	10	0	40
Pasture5B3	DREC5B3	2016	0	RG	80	0	20	0	30
Pasture5B3	DREC5B3	2016	0	RG	90	0	10	0	50
Pasture5B3	DREC5B3	2016	0	RG	75	0	25	0	50
Pasture5B3	DREC5B3	2016	0	RG	100	0	0	0	70
Pasture5C3	DREC5C3	2016	0	RG	90	0	10	0	80
Pasture5C3	DREC5C3	2016	0	RG	90	0	10	0	70
Pasture5C3	DREC5C3	2016	0	RG	90	0	10	0	70
Pasture5C3	DREC5C3	2016	0	RG	85	0	15	0	60
Pasture5C3	DREC5C3	2016	0	RG	80	5	15	0	40
Pasture5C3	DREC5C3	2016	0	RG	95	0	5	0	60
Pasture5C3	DREC5C3	2016	0	RG	95	0	5	0	70
Pasture5C3	DREC5C3	2016	0	RG	85	0	15	0	60
Pasture5C3	DREC5C3	2016	0	RG	65	0	30	5	50
Pasture5C3	DREC5C3	2016	0	RG	80	0	20	0	40
Pasture5C3	DREC5C3	2016	0	RG	80	0	10	10	60
Pasture5C3	DREC5C3	2016	0	RG	95	0	5	0	60
Pasture5C3	DREC5C3	2016	0	RG	95	0	5	0	110
Pasture5C3	DREC5C3	2016	0	RG	75	0	10	15	80
Pasture5C3	DREC5C3	2016	0	RG	90	0	10	0	60
Pasture5C3	DREC5C3	2016	0	RG	80	0	20	0	60
Pasture5C3	DREC5C3	2016	0	RG	90	0	10	0	60
Pasture5C3	DREC5C3	2016	0	RG	75	0	25	0	40
Pasture5C3	DREC5C3	2016	0	RG	85	0	15	0	80
Pasture5C3	DREC5C3	2016	0	RG	75	0	25	0	60
Pasture5C3	DREC5C3	2016	0	RG	85	0	15	0	80
Pasture5C3	DREC5C3	2016	0	RG	40	0	60	0	30
Pasture5C3	DREC5C3	2016	0	RG	95	0	5	0	80
Pasture5C3	DREC5C3	2016	0	RG	85	0	15	0	50
Pasture5C3	DREC5C3	2016	0	RG	90	0	10	0	50
Pasture5C3	DREC5C3	2016	0	RG	90	0	10	0	40
Pasture5C3	DREC5C3	2016	0	RG	80	0	20	0	50
Pasture5C3	DREC5C3	2016	0	RG	75	0	25	0	30
Pasture5C3	DREC5C3	2016	0	RG	70	0	30	0	40
Pasture5C3	DREC5C3	2016	0	RG	90	0	10	0	80
Pasture4C3	DREC4C3	2016	0	PBG	90	0	10	0	60
Pasture4C3	DREC4C3	2016	0	PBG	95	0	5	0	70
Pasture4C3	DREC4C3	2016	0	PBG	95	0	5	0	50
Pasture4C3	DREC4C3	2016	0	PBG	55	15	20	10	40
Pasture4C3	DREC4C3	2016	0	PBG	80	5	15	0	30
Pasture4C3	DREC4C3	2016	0	PBG	75	5	20	0	40
Pasture4C3	DREC4C3	2016	0	PBG	90	0	10	0	50
Pasture4C3	DREC4C3	2016	0	PBG	25	5	70	0	40
Pasture4C3	DREC4C3	2016	0	PBG	90	0	10	0	50
Pasture4C3	DREC4C3	2016	0	PBG	95	0	5	0	40
Pasture4C3	DREC4C3	2016	0	PBG	90	0	10	0	40
Pasture4C3	DREC4C3	2016	0	PBG	85	0	15	0	50
Pasture4C3	DREC4C3	2016	0	PBG	90	0	10	0	50
Pasture4C3	DREC4C3	2016	0	PBG	85	0	15	0	40
Pasture4C3	DREC4C3	2016	0	PBG	95	0	5	0	40
Pasture4C3	DREC4C3	2016	0	PBG	20	0	75	5	50
Pasture4C3	DREC4C3	2016	0	PBG	80	0	20	0	40
Pasture4C3	DREC4C3	2016	0	PBG	95	0	5	0	30
Pasture4C3	DREC4C3	2016	0	PBG	80	5	15	0	60
Pasture4C3	DREC4C3	2016	0	PBG	85	5	10	0	70
Pasture4C3	DREC4C3	2016	0	PBG	90	5	5	0	60
Pasture4C3	DREC4C3	2016	0	PBG	70	0	30	0	30
Pasture4C3	DREC4C3	2016	0	PBG	85	0	15	0	50
Pasture4C3	DREC4C3	2016	0	PBG	100	0	0	0	60
Pasture1B3	QUICK1B3	2016	0	PBG	15	0	85	0	6
Pasture1B3	QUICK1B3	2016	0	PBG	20	5	70	5	8
Pasture1B3	QUICK1B3	2016	0	PBG	5	15	75	5	8
Pasture1B3	QUICK1B3	2016	0	PBG	50	5	40	5	18
Pasture1B3	QUICK1B3	2016	0	PBG	15	5	60	20	6
Pasture1B3	QUICK1B3	2016	0	PBG	20	5	70	5	3
Pasture1B3	QUICK1B3	2016	0	PBG	20	0	5	75	11
Pasture1B3	QUICK1B3	2016	0	PBG	20	0	10	70	11
Pasture1B3	QUICK1B3	2016	0	PBG	15	0	0	85	8
Pasture1B3	QUICK1B3	2016	0	PBG	10	5	0	85	5
Pasture1B3	QUICK1B3	2016	0	PBG	15	5	5	75	0
Pasture1B3	QUICK1B3	2016	0	PBG	15	5	5	75	9
Pasture1B3	QUICK1B3	2016	0	PBG	15	5	50	30	2
Pasture1B3	QUICK1B3	2016	0	PBG	15	5	50	30	2
Pasture1B3	QUICK1B3	2016	0	PBG	25	5	50	20	6
Pasture1B3	QUICK1B3	2016	0	PBG	5	5	5	85	0
Pasture1B3	QUICK1B3	2016	0	PBG	20	5	35	40	8
Pasture1B3	QUICK1B3	2016	0	PBG	30	0	20	50	6
Pasture1B3	QUICK1B3	2016	0	PBG	5	5	0	90	0
Pasture1B3	QUICK1B3	2016	0	PBG	75	5	15	5	12
Pasture1B3	QUICK1B3	2016	0	PBG	15	10	15	60	3
Pasture1B3	QUICK1B3	2016	0	PBG	10	15	10	65	1
Pasture1B3	QUICK1B3	2016	0	PBG	25	5	55	15	5
Pasture1B3	QUICK1B3	2016	0	PBG	15	0	20	65	5

## Sheet: Column ID
ID	Pasture	Year	TRT	Grass	Forb	Lit	BG	SubHgt	use
Nest or sample point	Pasture ID	year of research	PBG (Patch burn grazing) or ROT (rotational grazing)	% grass cover	% forb cover	% litter	% bare ground	nesting substrate height	Used (1) unused (0)
